# Supplementary material
Source: PubMed Central journal article supplement (PMC2742710)

**Supporting Information for**  
**Synthesis of Neoglycoconjugates by the Desulfurative**  
**Rearrangement of Allylic Disulfides**

*David Crich\* and Fan Yang*

Department of Chemistry, Wayne State University, 5101 Cass Avenue, Detroit, MI 48202

**Table of Contents**

| Compound                                                                                                                                                                            | Spectra  |
|-------------------------------------------------------------------------------------------------------------------------------------------------------------------------------------|----------|
| (Z)-4-Hydroxybut-2-enyl Tetra- <i>O</i> -acetyl- $\beta$ -D-glucopyranoside ( <b>2a</b> )                                                                                           | S-3, 4   |
| (Z)-4-Hydroxybut-2-enyl Tetra- <i>O</i> -acetyl- $\beta$ -D-galactopyranoside ( <b>2b</b> )                                                                                         | S-5, 6   |
| (Z)-4-Hydroxybut-2-enyl Hepta- <i>O</i> -acetyl- $\beta$ -D-cellobioside ( <b>2c</b> )                                                                                              | S-7, 8   |
| (Z)-4-Hydroxybut-2-enyl (Methyl 4,7,8,9-tetra- <i>O</i> -acetyl-5-acetylamino-3,5-dideoxy-D-glycero- $\alpha$ -D-galacto-non-2-ulopyranosylonate) ( <b>7</b> )                      | S-9, 10  |
| (Z)-4-(Phenyloxythionocarbonyloxy)-2-butenyl Tetra- <i>O</i> -acetyl- $\beta$ -D-glucopyranoside ( <b>3a</b> )                                                                      | S-11, 12 |
| (Z)-4-(Phenyloxythionocarbonyloxy)-2-butenyl Tetra- <i>O</i> -acetyl- $\beta$ -D-galactopyranoside ( <b>3b</b> )                                                                    | S-13, 14 |
| (Z)-4-(Phenyloxythionocarbonyloxy)-2-butenyl Hepta- <i>O</i> -acetyl- $\beta$ -D-cellobioside ( <b>3c</b> )                                                                         | S-15, 16 |
| (Z)-4-(Phenyloxythionocarbonyloxy)-2-butenyl (Methyl 4,7,8,9-tetra- <i>O</i> -acetyl-5-acetylamino-3,5-dideoxy-D-glycero- $\alpha$ -D-galacto-non-2-ulopyranosylonate) ( <b>8</b> ) | S-17, 18 |
| 2-(Phenyloxycarbonylthioxy)-3-butenyl Tetra- <i>O</i> -acetyl- $\beta$ -D-glucopyranoside ( <b>4a</b> )                                                                             | S-19, 20 |
| 2-(Phenyloxycarbonylthioxy)-3-butenyl Tetra- <i>O</i> -acetyl- $\beta$ -D-galactopyranoside ( <b>4b</b> )                                                                           | S-21, 22 |
| 2-(Phenyloxycarbonylthioxy)-3-butenyl Hepta- <i>O</i> -acetyl- $\beta$ -D-cellobioside ( <b>4c</b> )                                                                                | S-23, 24 |
| 2-(Phenyloxycarbonylthioxy)-3-butenyl (Methyl 4,7,8,9-tetra- <i>O</i> -acetyl-5-acetylamino-3,5-dideoxy-D-glycero- $\alpha$ -D-galacto-non-2-ulopyranosylonate) ( <b>9</b> )        | S-25, 26 |
| 2-(Benzothiazol-2-ylidisulfanyl)-3-enyl Tetra- <i>O</i> -acetyl- $\beta$ -D-glucopyranoside ( <b>5a</b> )                                                                           | S-27, 28 |
| 2-(Benzothiazol-2-ylidisulfanyl)-3-enyl Tetra- <i>O</i> -acetyl- $\beta$ -D-galactopyranoside ( <b>5b</b> )                                                                         | S-29, 30 |
| 2-(Benzothiazol-2-ylidisulfanyl)-3-enyl Hepta- <i>O</i> -acetyl- $\beta$ -D-cellobioside ( <b>5c</b> )                                                                              | S-31, 32 |

|                                                                                                                                                                                                         |                 |          |
|---------------------------------------------------------------------------------------------------------------------------------------------------------------------------------------------------------|-----------------|----------|
| 2-(Benzothiazol-2-ylidisulfanyl)-3-enyl<br>4,7,8,9-tetra- <i>O</i> -acetyl-5-acetylamino-3,5-dideoxy-D-glycero- $\alpha$ -D-galacto-non-2-ulopyranosylonate) ( <b>10</b> )                              | (Methyl         | S-33, 34 |
| 2-(Phenoxy-carbonylthioxy)-3-butenol ( <b>12</b> )                                                                                                                                                      |                 | S-35, 26 |
| <i>S</i> -[4-(Tetra- <i>O</i> -acetyl- $\beta$ -D-glucopyranosyloxy)-2 <i>E</i> -butenyl]<br><i>N</i> -( <i>t</i> -Butyloxycarbonyl)- $\gamma$ -L-Glu ( $\alpha$ -OMe)-L-Cys-Gly-OMe ( <b>16</b> )      |                 | S-37, 38 |
| <i>S</i> -[4-(Tetra- <i>O</i> -acetyl- $\beta$ -D-glucopyranosyloxy)-2 <i>E</i> -butenyl]<br><i>N</i> -( <i>t</i> -Butyloxycarbonyl)- $\gamma$ -L-Glu ( $\alpha$ -OMe)-L-Cys-Gly-OMe ( <b>17</b> )      |                 | S-39, 40 |
| <i>S</i> -[4-(Hepta- <i>O</i> -acetyl- $\beta$ -D-cellobiosyloxy)-2 <i>E</i> -butenyl]<br><i>N</i> -( <i>t</i> -Butyloxycarbonyl)- $\gamma$ -L-Glu ( $\alpha$ -OMe)-L-Cys-Gly-OMe ( <b>18</b> )         |                 | S-41, 42 |
| <i>S</i> -[4-(Tetra- <i>O</i> -acetyl- $\beta$ -D-glucopyranosyloxy)-2 <i>E</i> -butenyl]<br><i>N</i> -( <i>t</i> -Butyloxycarbonyl)-L-Cys-L-Ala-L-Trp-OMe ( <b>20</b> )                                |                 | S-43, 44 |
| <i>S</i> -[4-(Tetra- <i>O</i> -acetyl- $\beta$ -D-glucopyranosyloxy)-2 <i>E</i> -butenyl]<br><i>N</i> -( <i>t</i> -Butyloxycarbonyl)-L-Cys-L-Ala-L-Trp-OMe ( <b>21</b> )                                |                 | S-45, 46 |
| <i>S</i> -[4-(Tetra- <i>O</i> -acetyl- $\beta$ -D-glucopyranosyloxy)-2 <i>E</i> -butenyl]<br>-L-Cys-Gly ( <b>23</b> )                                                                                   | $\gamma$ -L-Glu | S-47, 48 |
| <i>S</i> -[4-(Methyl<br>4,7,8,9-tetra- <i>O</i> -acetyl-5-acetylamino-3,5-dideoxy-D-glycero- $\alpha$ -D-galacto-non-2-ulopyranosylonate)-2 <i>E</i> -butenyl] $\gamma$ -L-Glu -L-Cys-Gly ( <b>24</b> ) |                 | S-49, 50 |
| 2-(2-Pyridyldisulfanyl)-3-enyl $\beta$ -D-Galactopyranoside ( <b>25b</b> )                                                                                                                              |                 | S-51, 52 |
| 2-(2-Pyridyldisulfanyl)-3-enyl $\beta$ -D- Cellobioside ( <b>25c</b> )                                                                                                                                  |                 | S-53, 54 |
| 2-(2-Pyridyldisulfanyl)-3-enyl (Methyl 5-acetylamino<br>-3,5-dideoxy-D-glycero- $\alpha$ -D-galacto-non-2-ulopyranosylonate) ( <b>26</b> )                                                              |                 | S-55, 56 |
| <i>S</i> -[4-( $\beta$ -D-Galactopyranosyloxy)-2 <i>E</i> -butenyl] $\gamma$ -L-Glu-L-Cys-Gly ( <b>27</b> )                                                                                             |                 | S-57, 58 |
| <i>S</i> -[4-( $\beta$ -D-Cellobiosyloxy)-2 <i>E</i> -butenyl] $\gamma$ -L-Glu-L-Cys-Gly ( <b>28</b> )                                                                                                  |                 | S-59, 60 |
| <i>S</i> -[4-(Methyl (5-acetamido-3,5-dideoxy-D-glycero- $\alpha$ -<br>D-galacto-non-2-ulopyranoside)onate)-2 <i>E</i> -butenyl] $\gamma$ -L-Glu -L-Cys-Gly ( <b>29</b> )                               |                 | S-61, 62 |
| <i>t</i> -Butyl 3-Acetylthio-4-pentenoate ( <b>32</b> )                                                                                                                                                 |                 | S-63, 64 |
| <i>t</i> -Butyl 3-[(2-Pyridinyl)disulfanyl]-4-pentenoate ( <b>33</b> )                                                                                                                                  |                 | S-65, 66 |
| 3-[(2-Pyridinyl)disulfanyl]-4-pentenoic Acid ( <b>34</b> )                                                                                                                                              |                 | S-67, 68 |
| N-( $\beta$ -D-Glucopyranosyl) 3-[(2-Pyridinyl)disulfanyl]-4-pentenamide ( <b>36a</b> )                                                                                                                 |                 | S-69, 70 |
| N-(2-Acetamido-2-deoxy- $\beta$ -D-Glucopyranosyl)<br>3-[(2-Pyridinyl)disulfanyl]-4-pentenamide ( <b>36b</b> )                                                                                          |                 | S-71, 72 |
| <i>S</i> -[N-( $\beta$ -D-Glucopyranosyl)-5-carboxamido-2 <i>E</i> -butenyl] $\gamma$ -L-Glu-L-Cys-Gly ( <b>37</b> )                                                                                    |                 | S-73, 74 |
| <i>S</i> -[N-(2-Acetamido-2-deoxy- $\beta$ -D-Glucopyranosyl)-5-carboxamido-2 <i>E</i> -buteny<br>l] $\gamma$ -L-Glu-L-Cys-Gly ( <b>38</b> )                                                            |                 | S-75, 76 |
| <i>S</i> -[N-(2-Acetamido-2-deoxy- $\beta$ -D-Glucopyranosyl)-5-carboxamido-2 <i>E</i> -buteny<br>l] L-Val-L-Thr-L-Cys-Gly ( <b>40</b> )                                                                |                 | S-77, 78 |

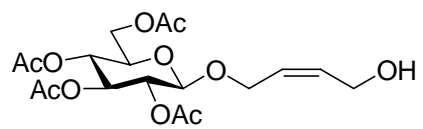

2a <sup>1</sup>H NMR (500 MHz, CDCl<sub>3</sub>)

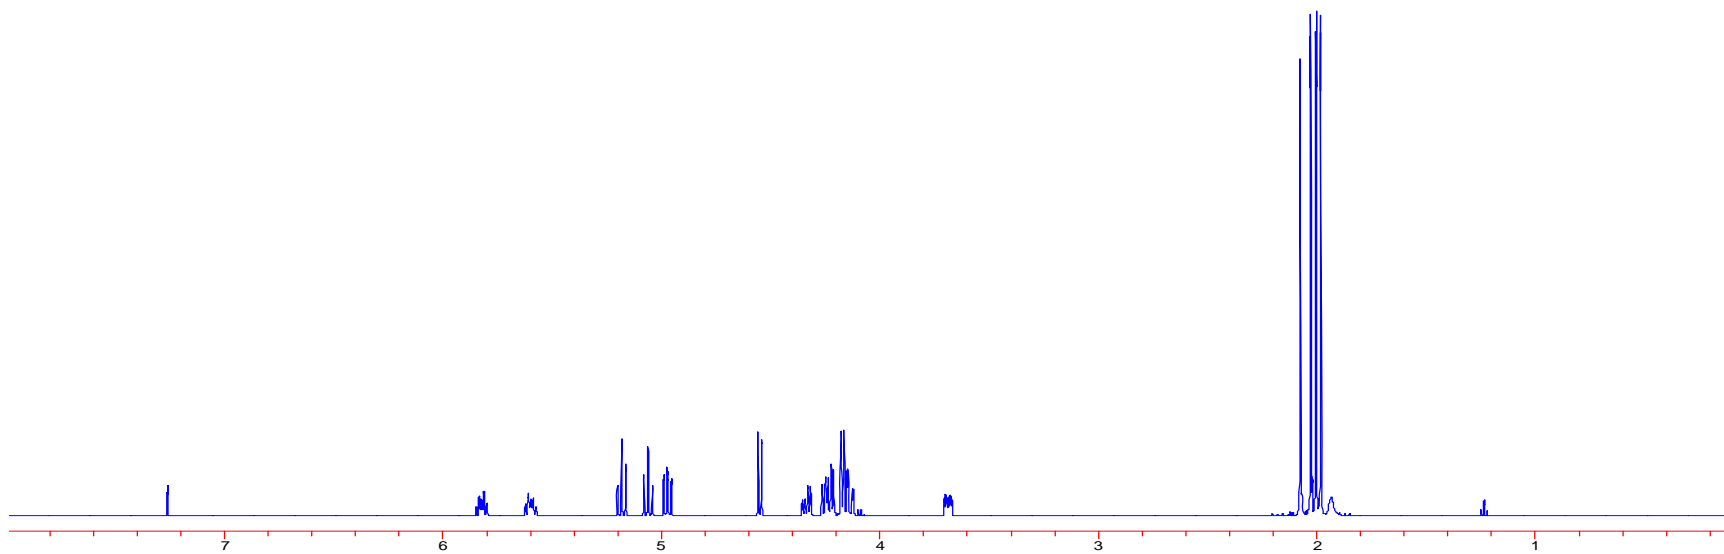

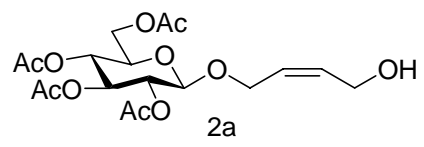

2a  $^{13}\text{C}$  NMR (125 MHz,  $\text{CDCl}_3$ )

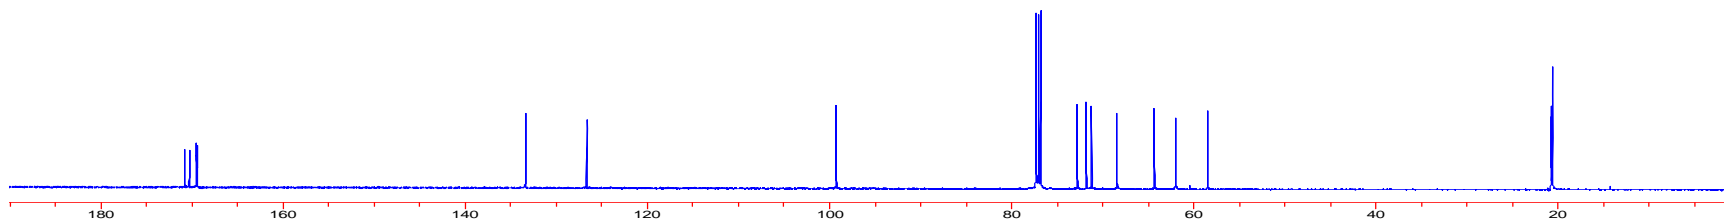

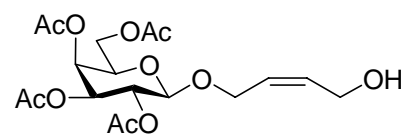

2b  $^1\text{H}$  NMR (500 MHz,  $\text{CDCl}_3$ )

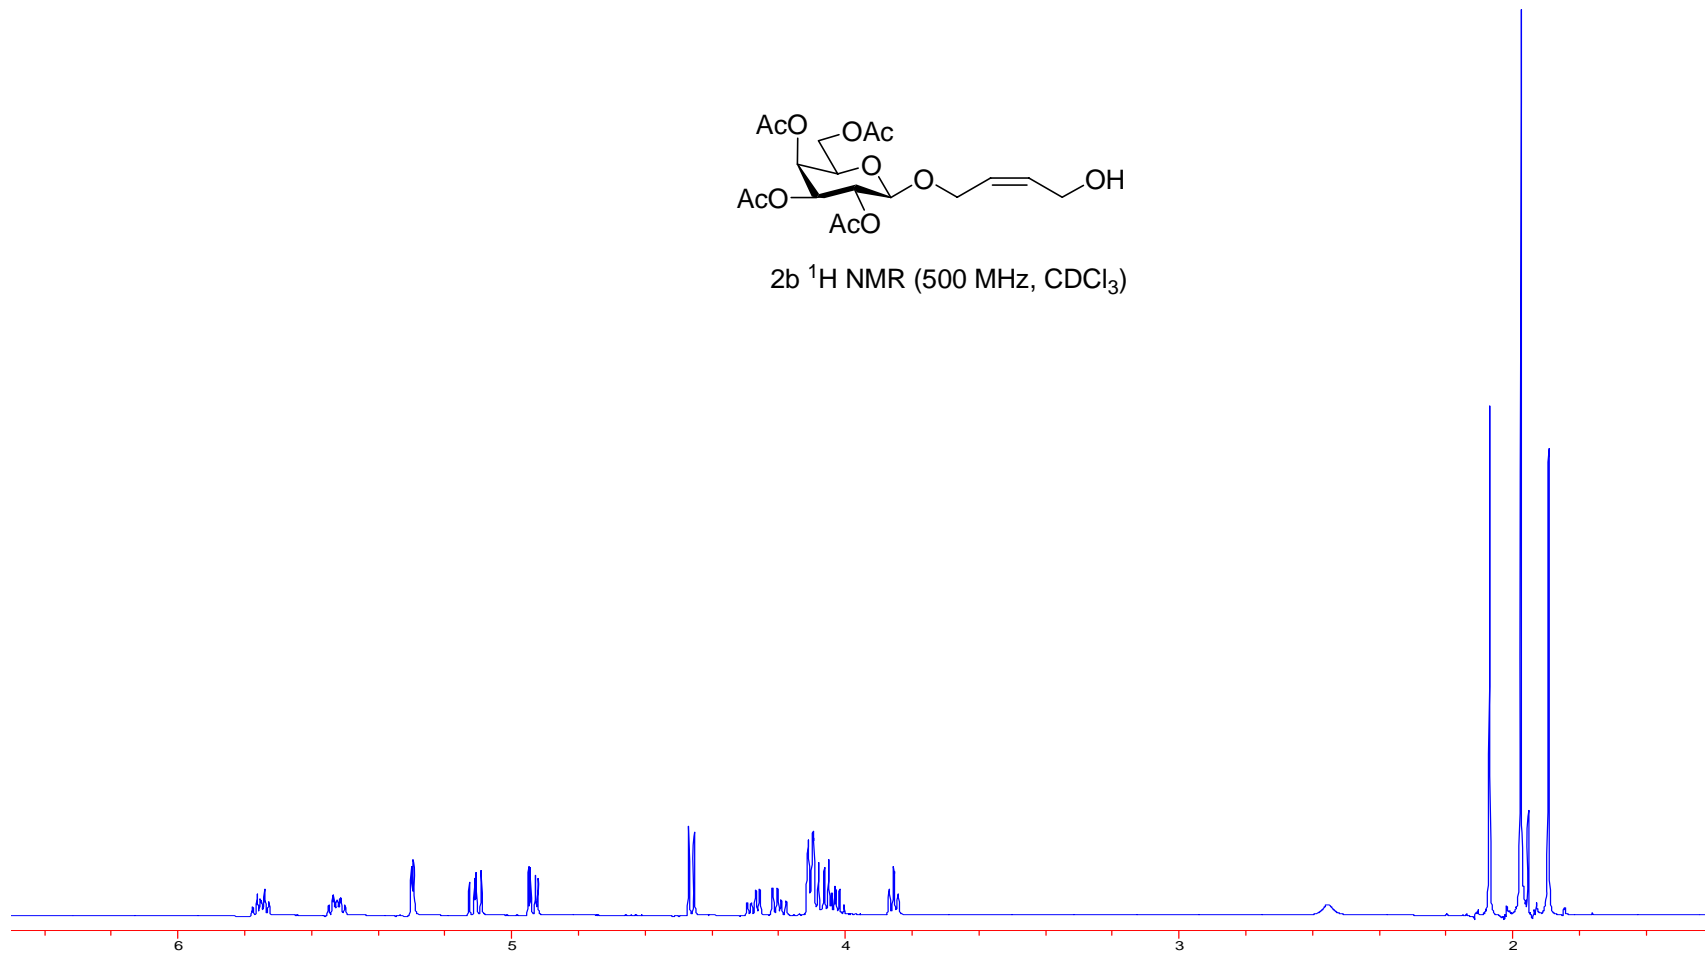

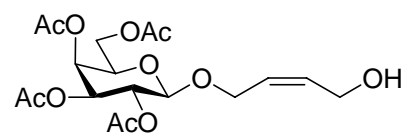

2b  $^{13}\text{C}$  NMR (125 MHz,  $\text{CDCl}_3$ )

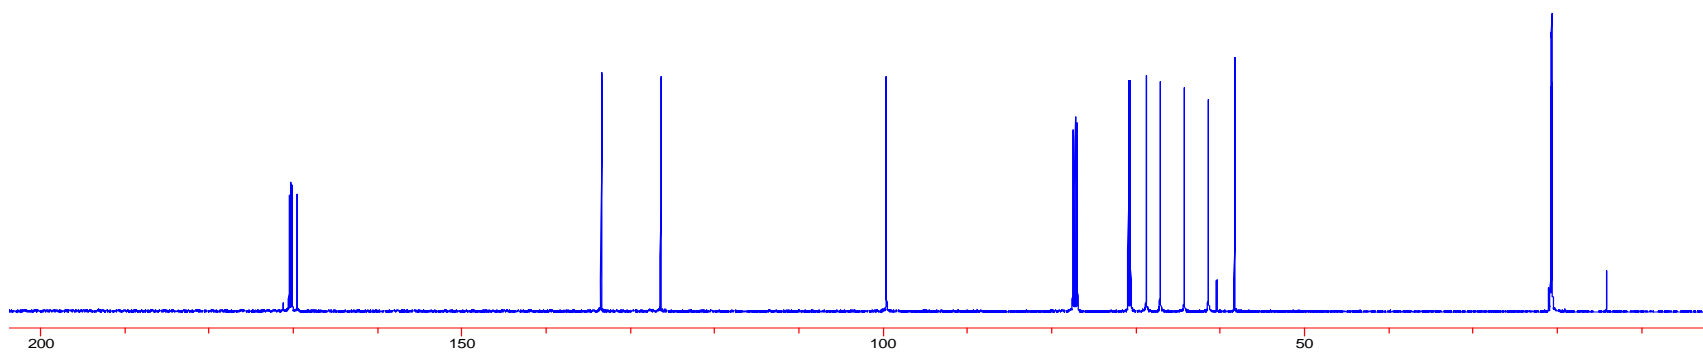

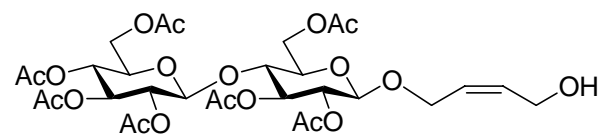

2c  $^{13}\text{C}$  NMR (125 MHz,  $\text{CDCl}_3$ )

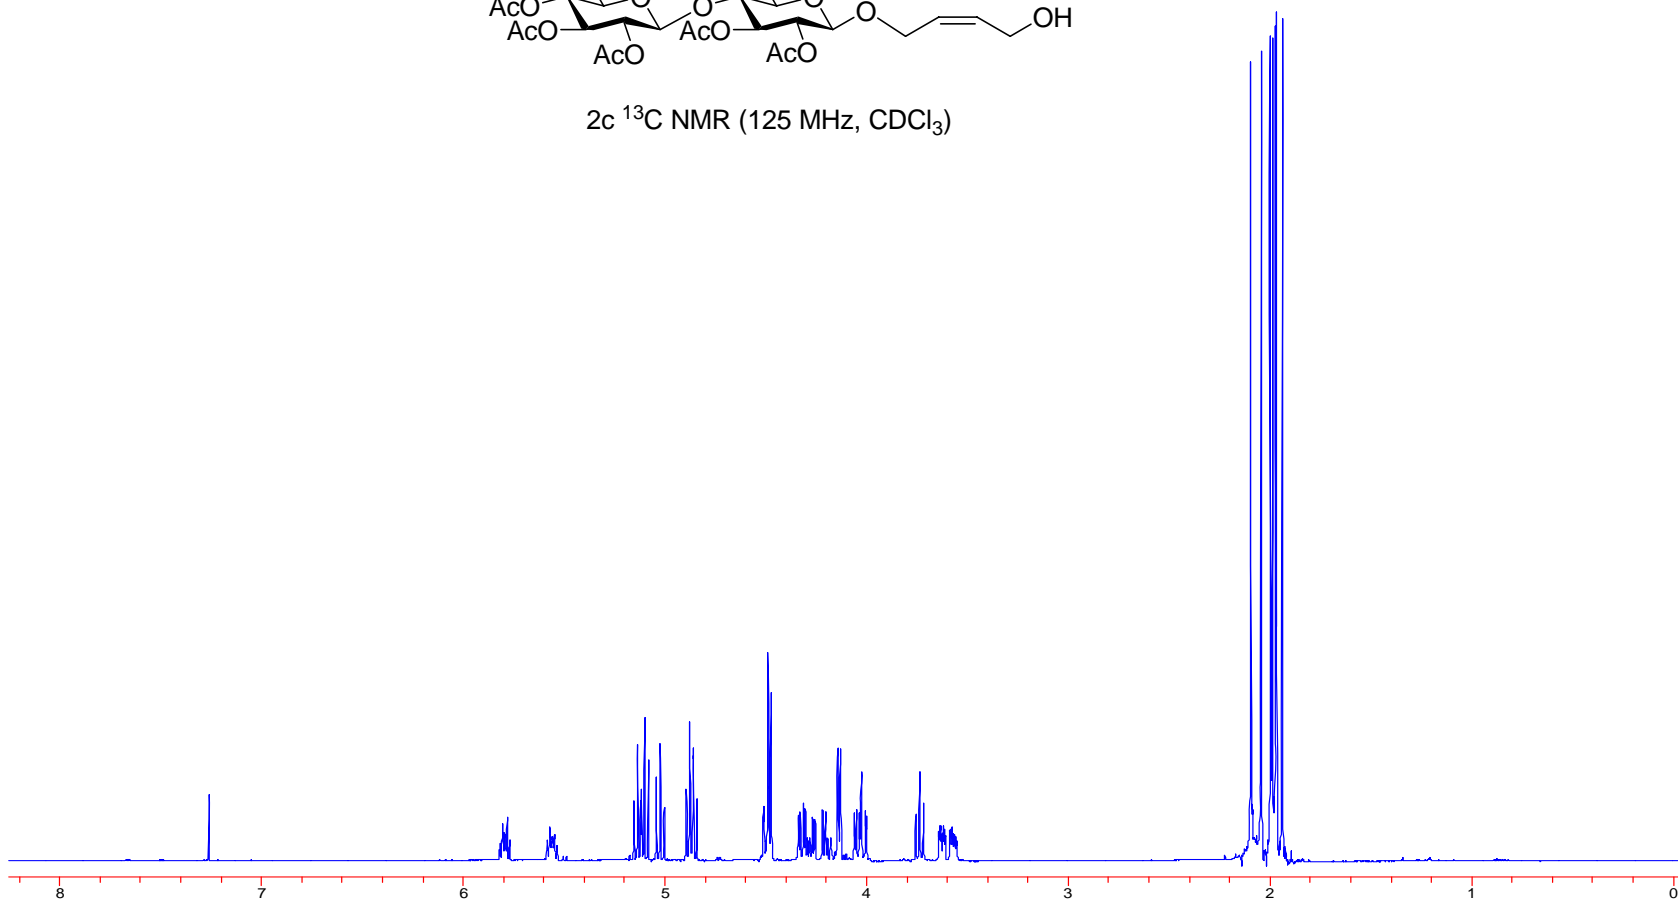

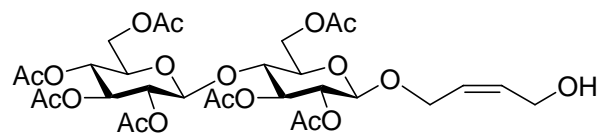

2c  $^1\text{H}$  NMR (500 MHz,  $\text{CDCl}_3$ )

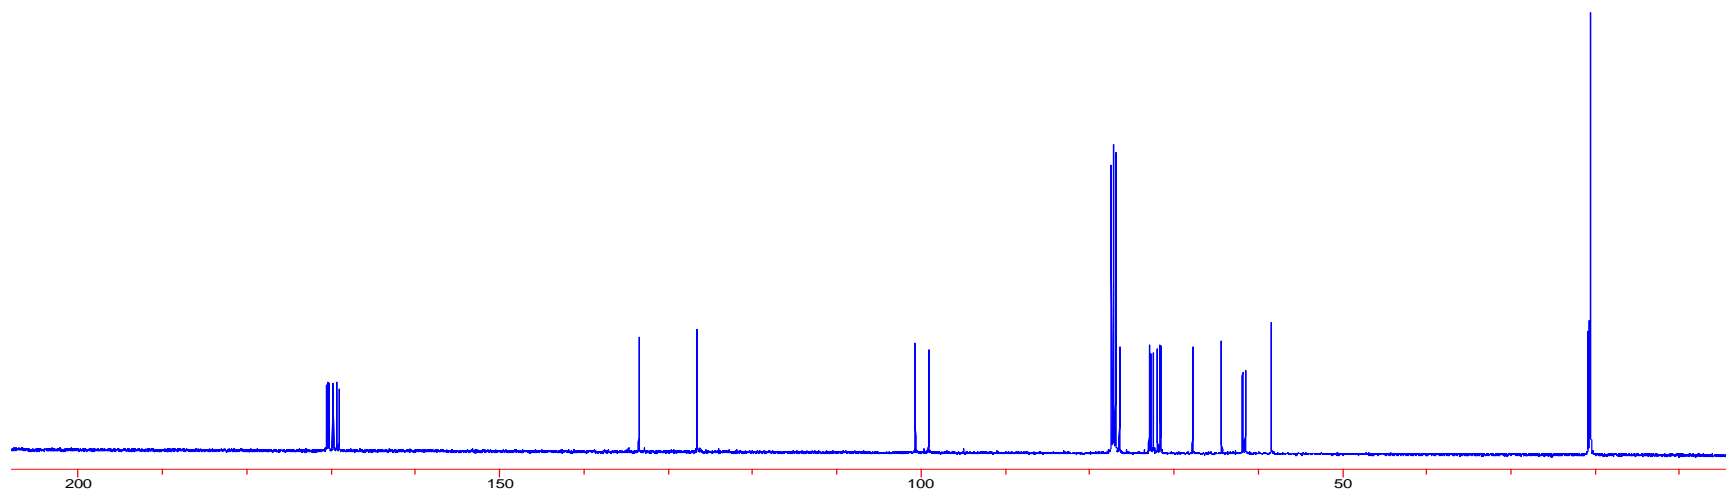



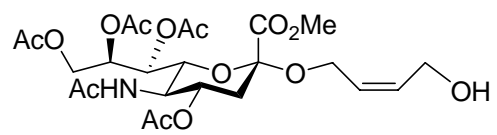

7  $^1\text{H}$  NMR (500 MHz,  $\text{CDCl}_3$ )

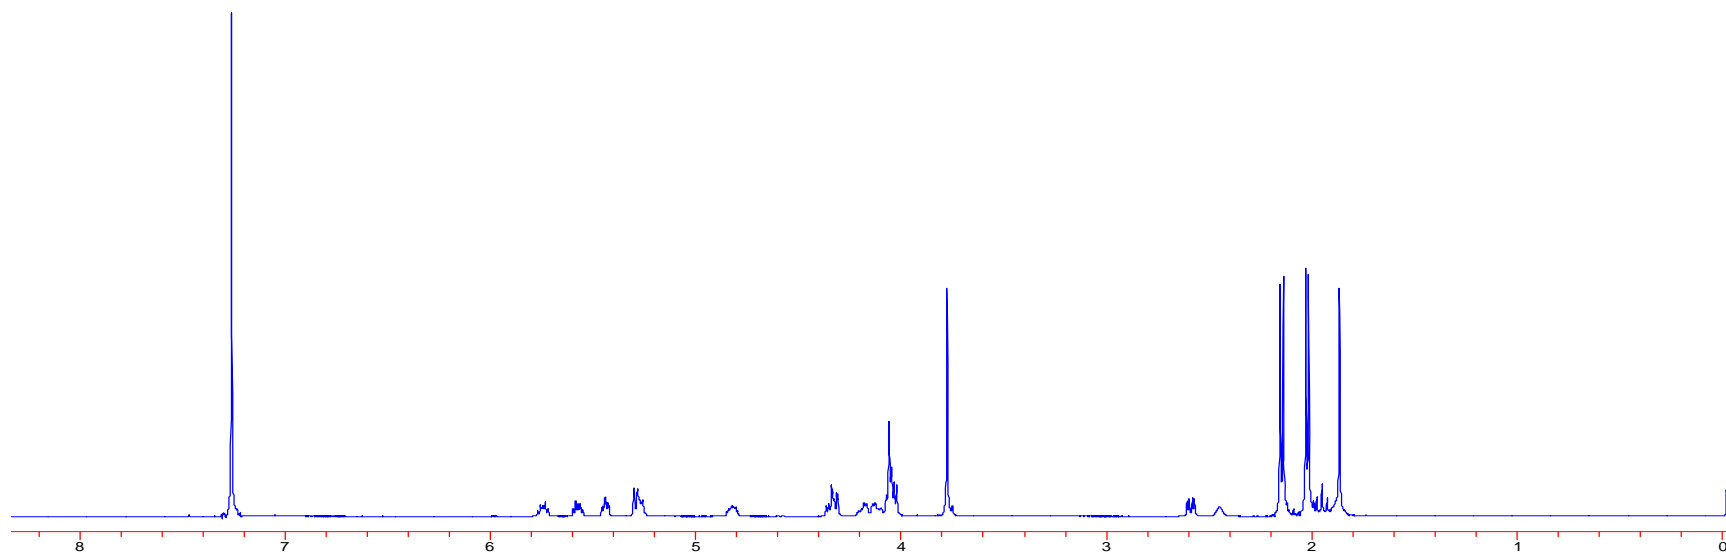

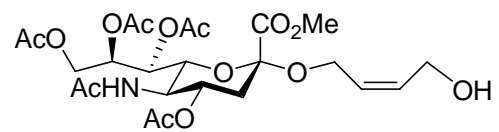

7  $^{13}\text{C}$  NMR (125 MHz,  $\text{CDCl}_3$ )

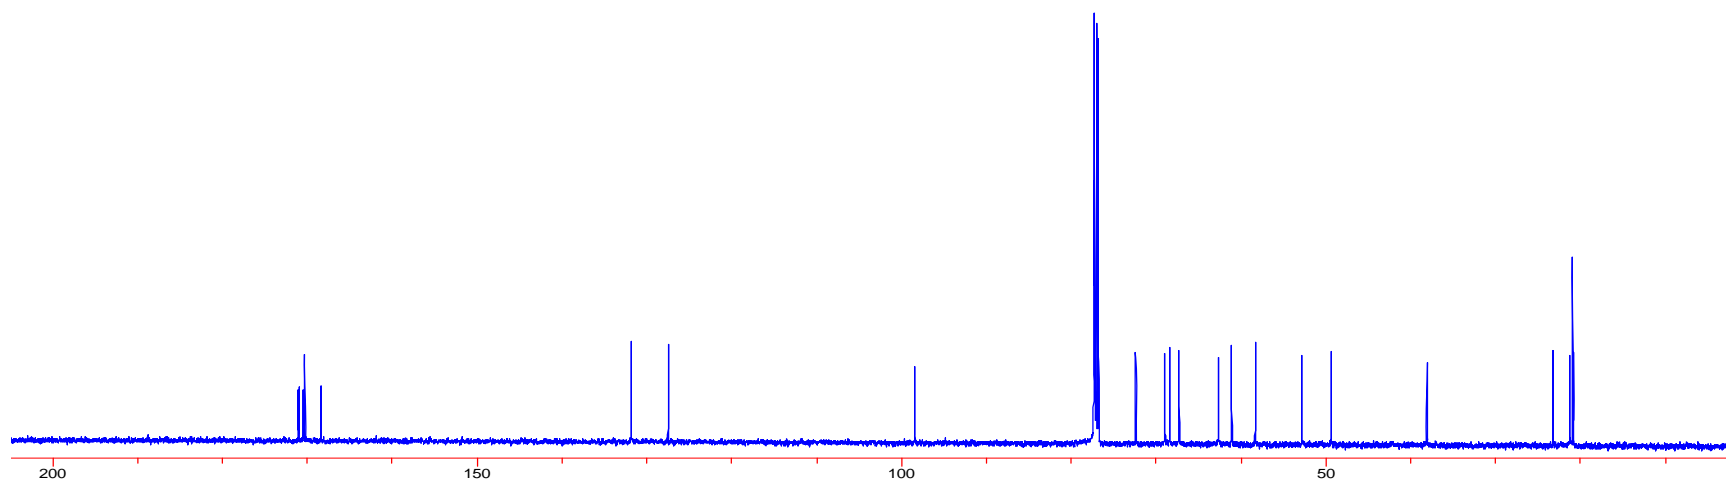

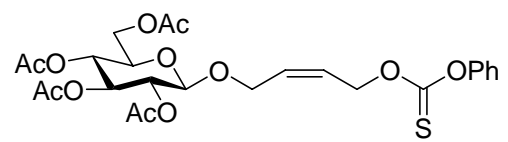

3a <sup>1</sup>H NMR (500 MHz, CDCl<sub>3</sub>)

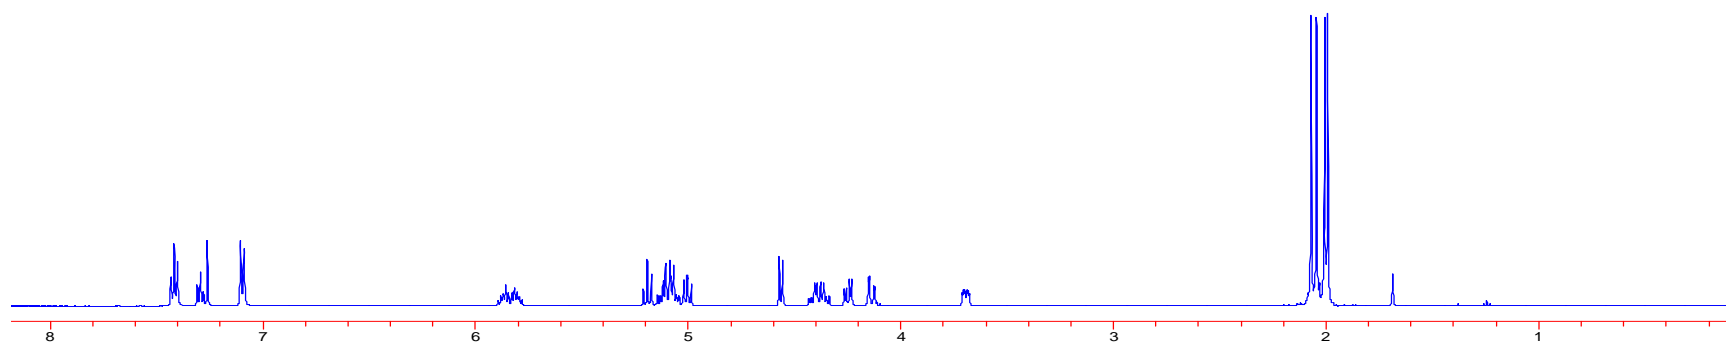

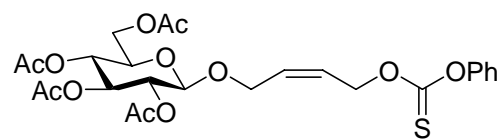

3a  $^{13}\text{C}$  NMR (125 MHz,  $\text{CDCl}_3$ )

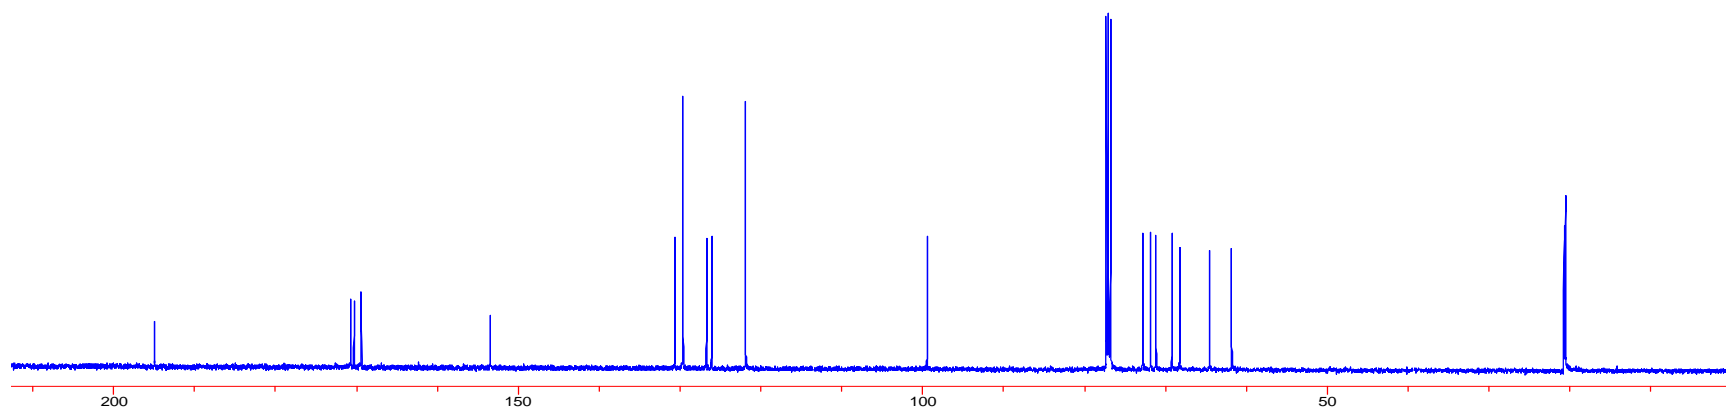

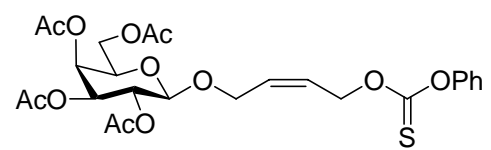

3b  $^1\text{H}$  NMR (500 MHz,  $\text{CDCl}_3$ )

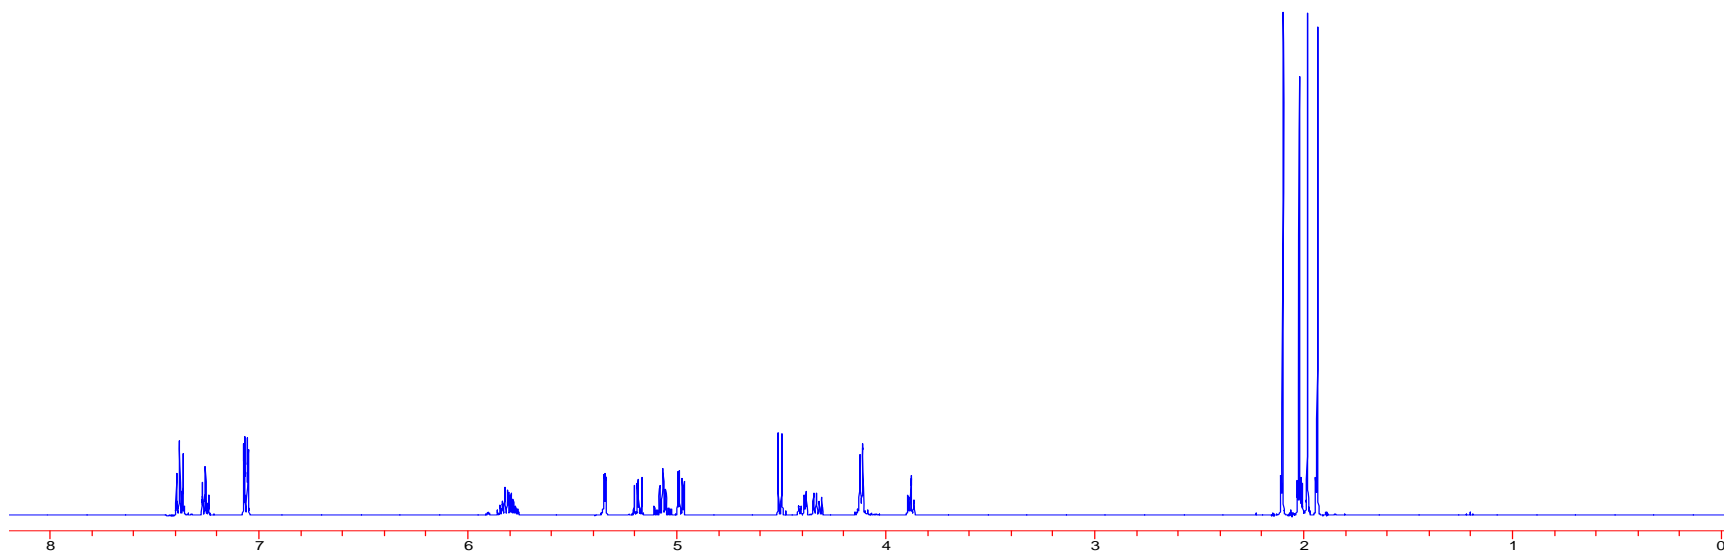

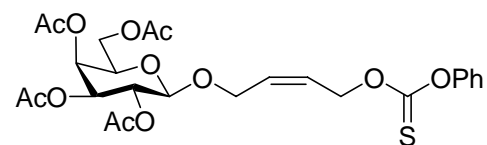

3b  $^{13}\text{C}$  NMR (125 MHz,  $\text{CDCl}_3$ )

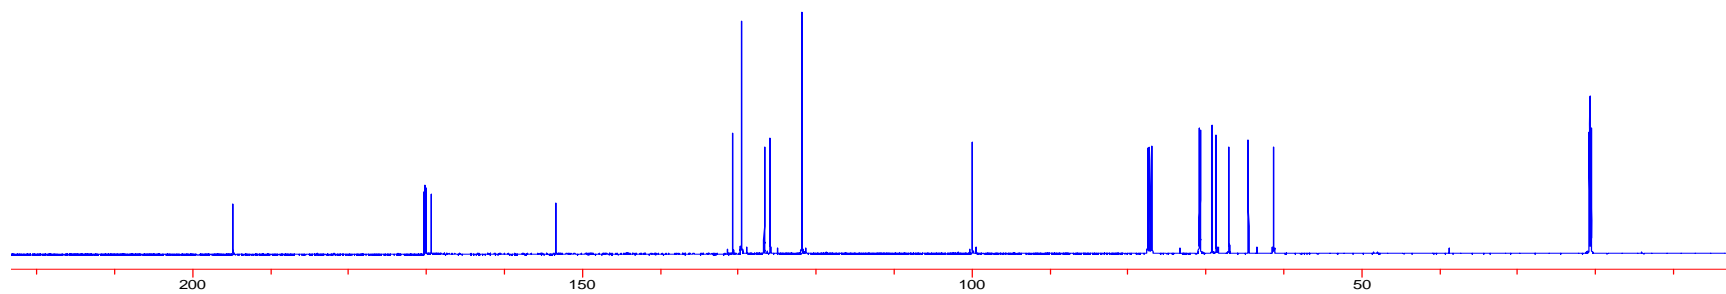

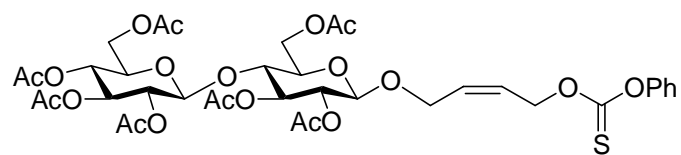

3c  $^1\text{H}$  NMR (500 MHz,  $\text{CDCl}_3$ )

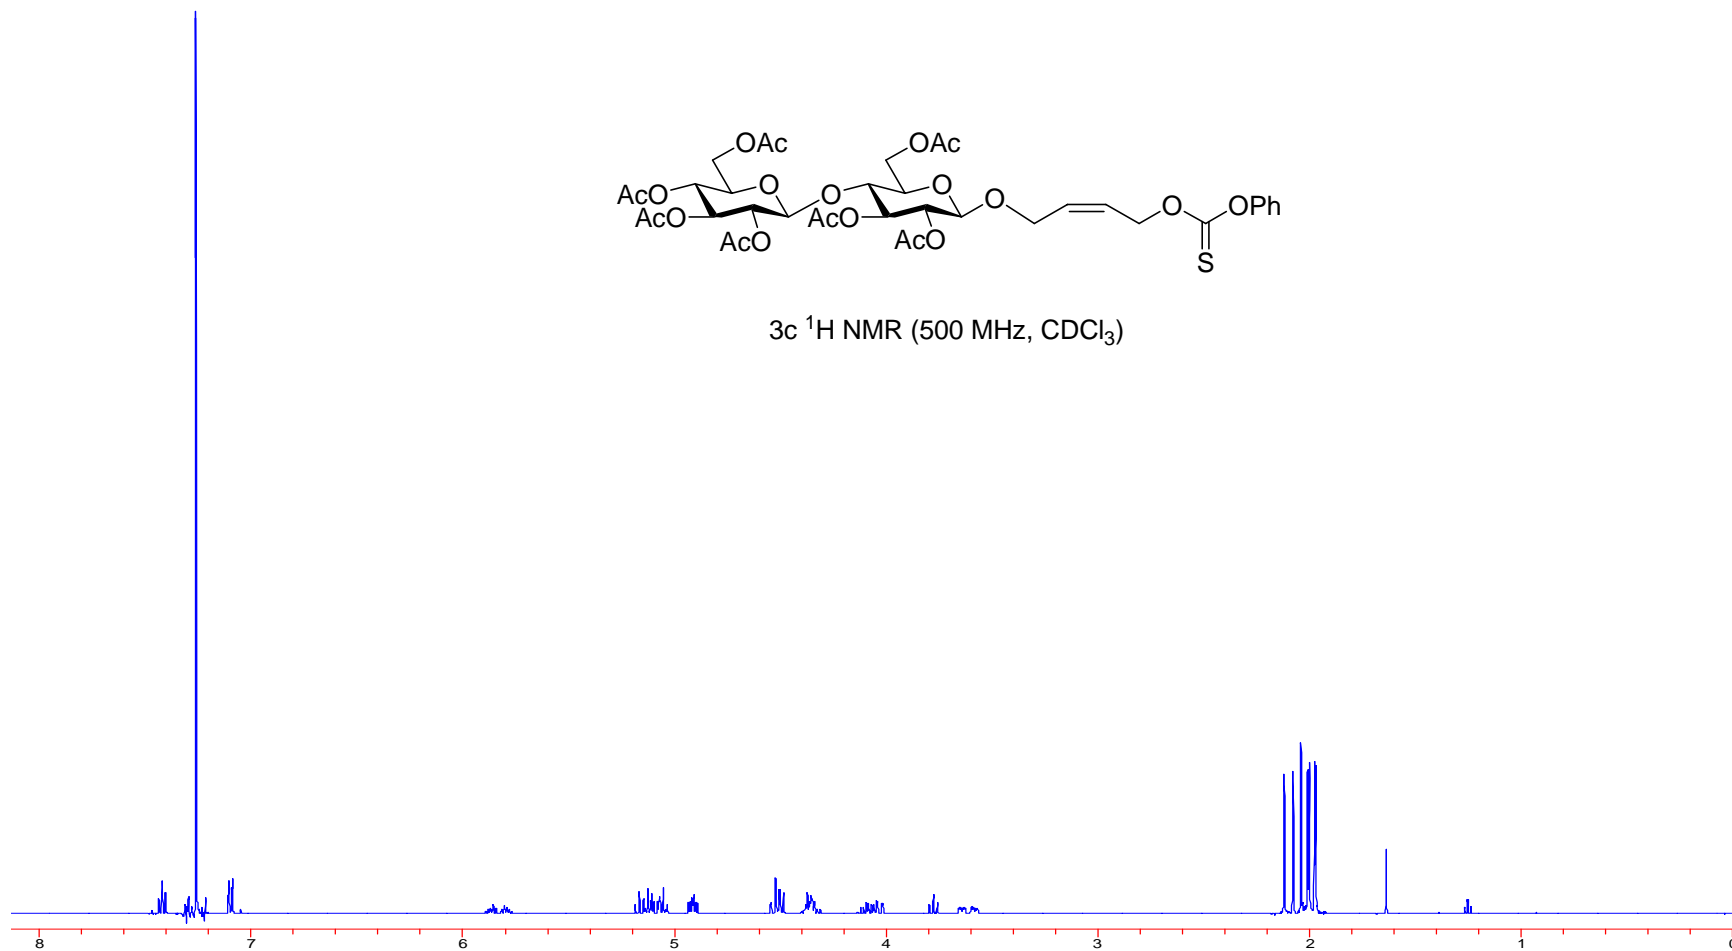

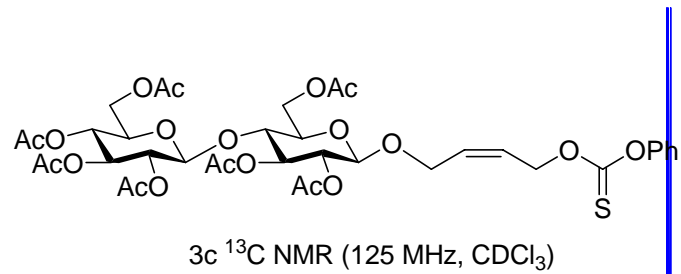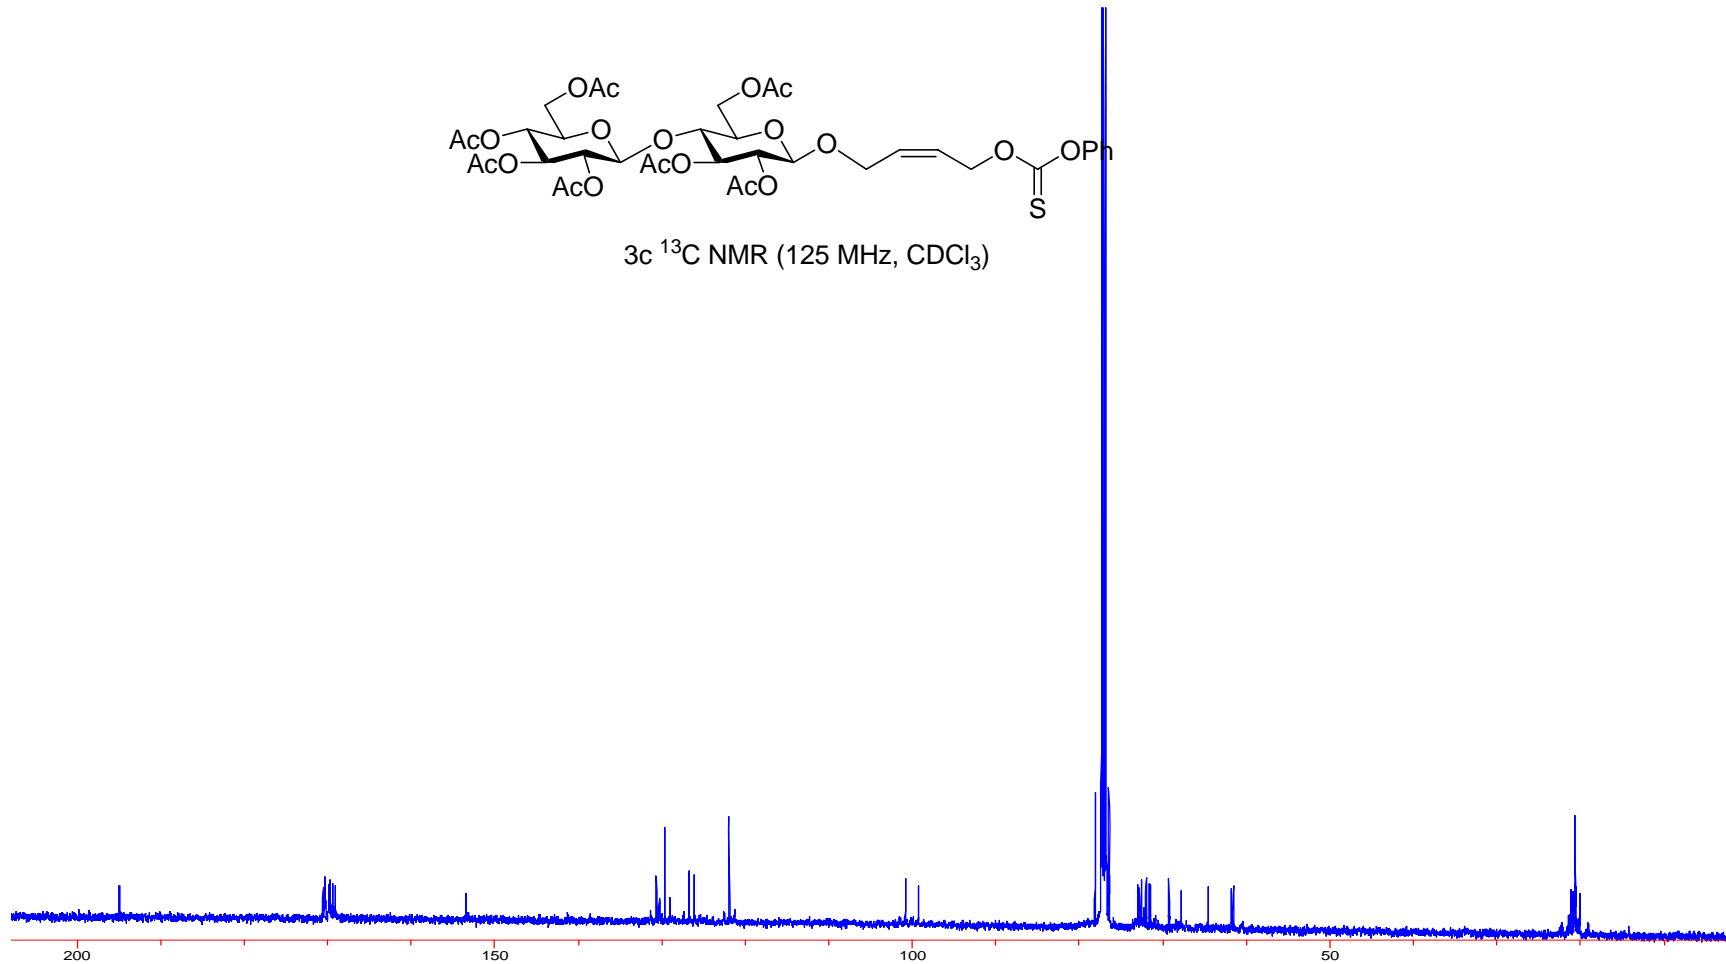



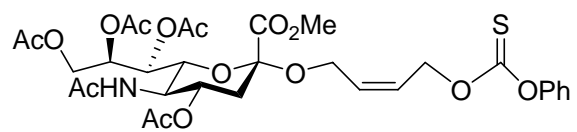

8  $^1\text{H}$  NMR (500 MHz,  $\text{CDCl}_3$ )

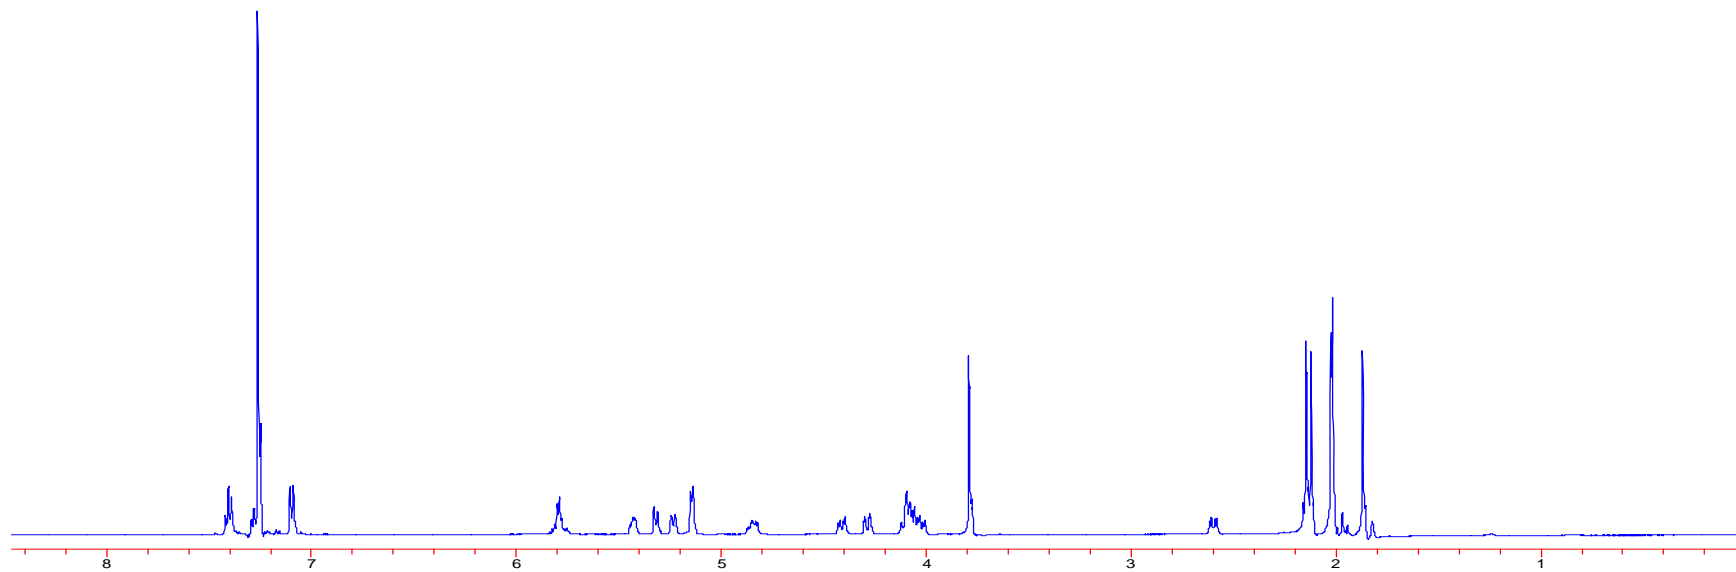

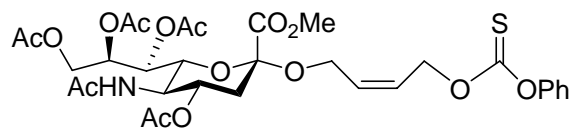

8  $^1\text{H}$  NMR (500 MHz,  $\text{CDCl}_3$ )

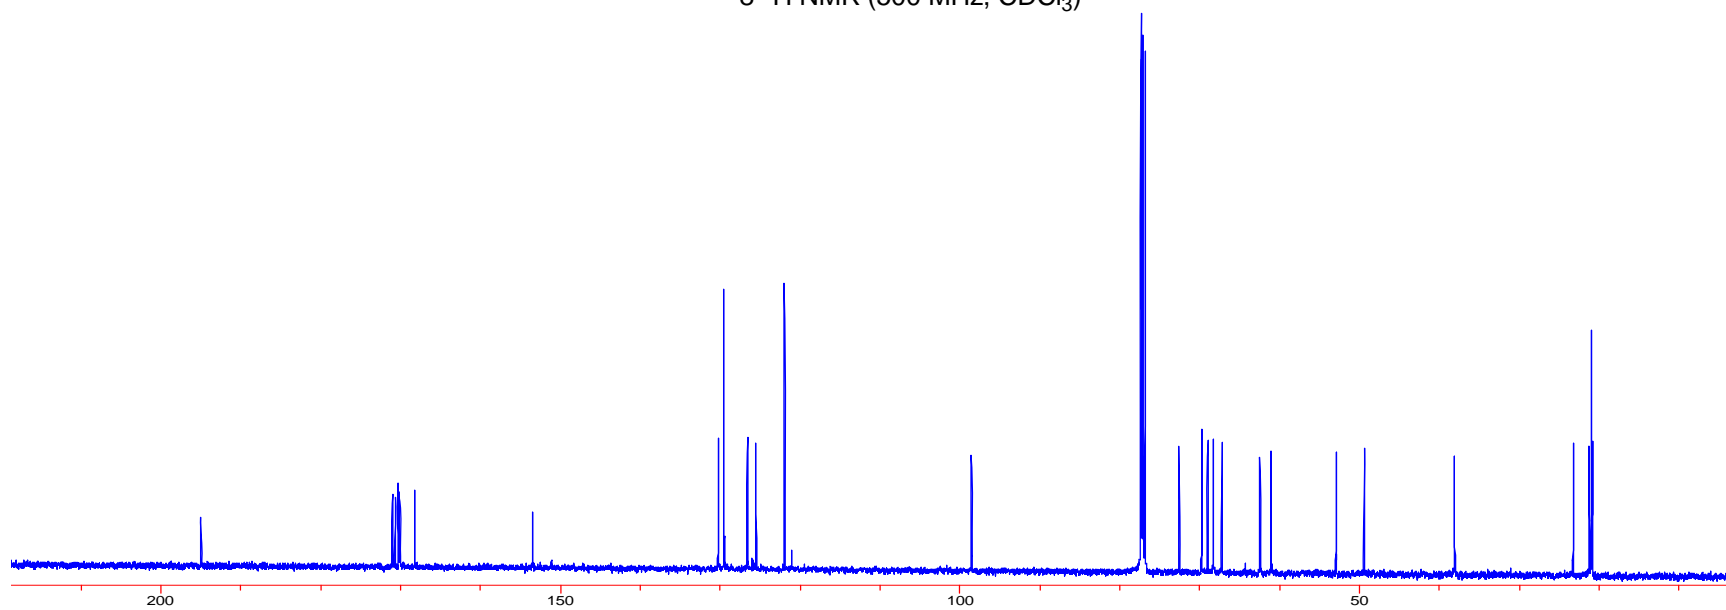

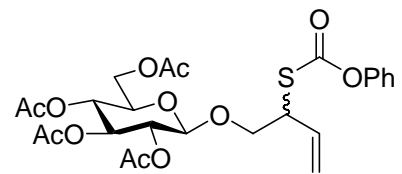

4a  $^1\text{H}$  NMR (500 MHz,  $\text{CDCl}_3$ )

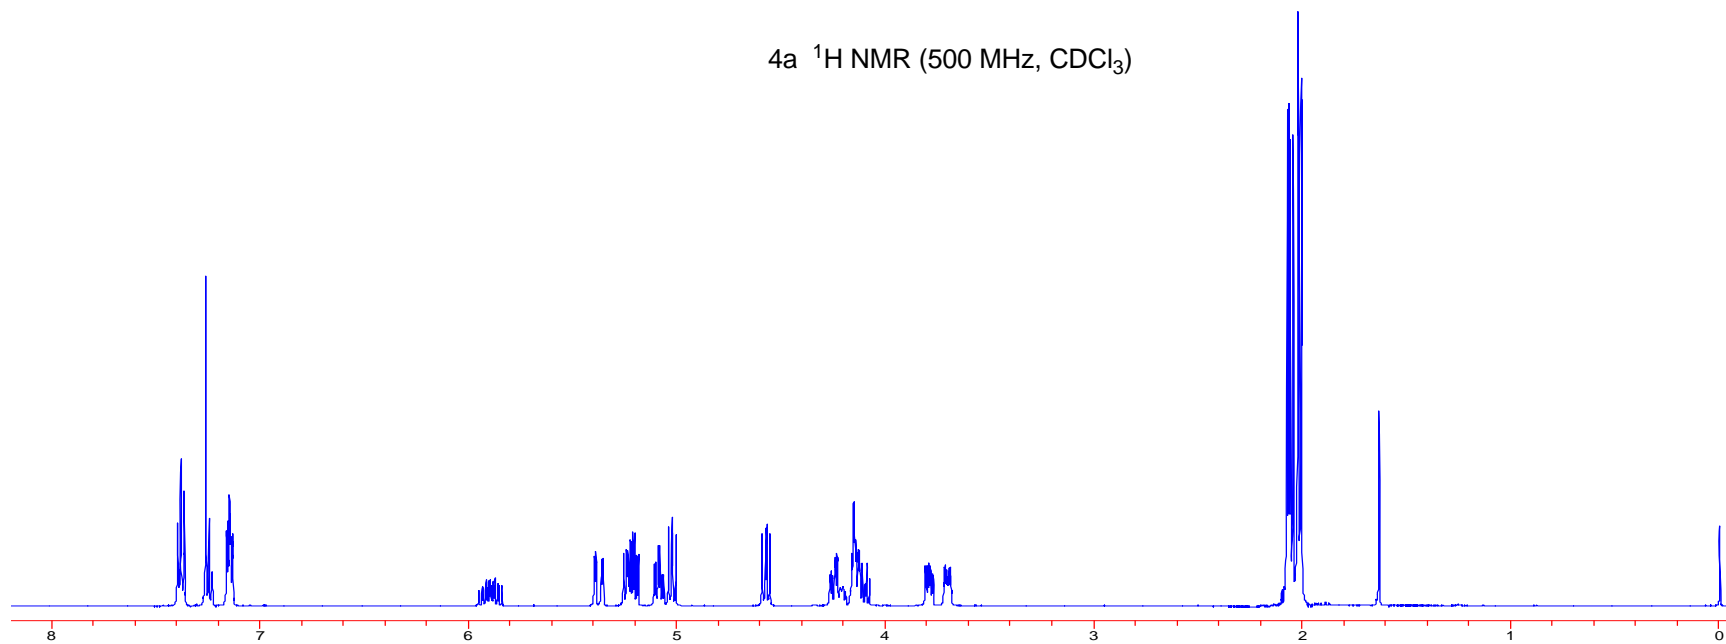

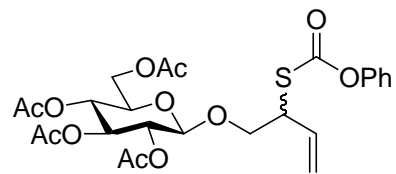

4a  $^{13}\text{C}$  NMR (125 MHz,  $\text{CDCl}_3$ )

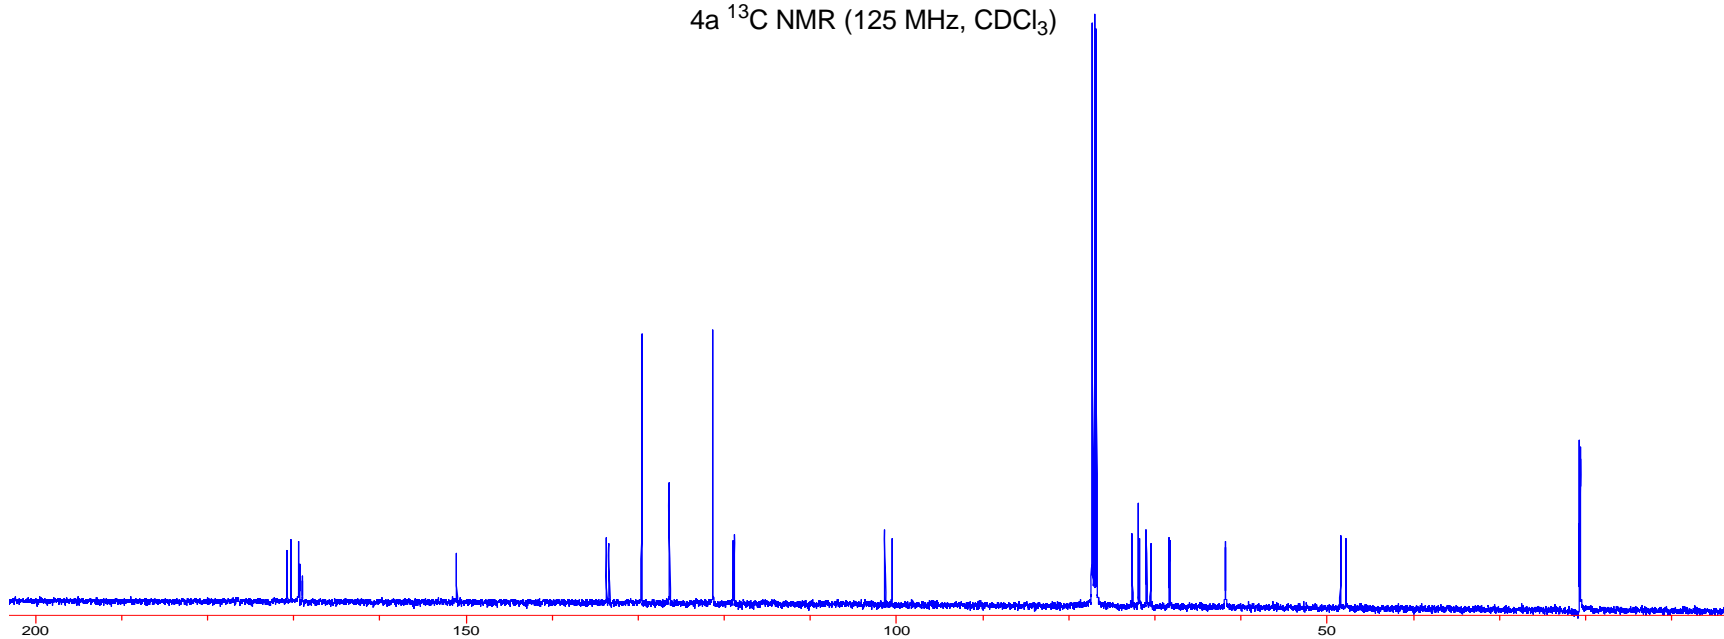

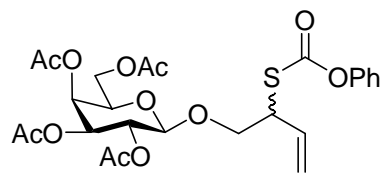

4b  $^1\text{H}$  NMR (500 MHz,  $\text{CDCl}_3$ )

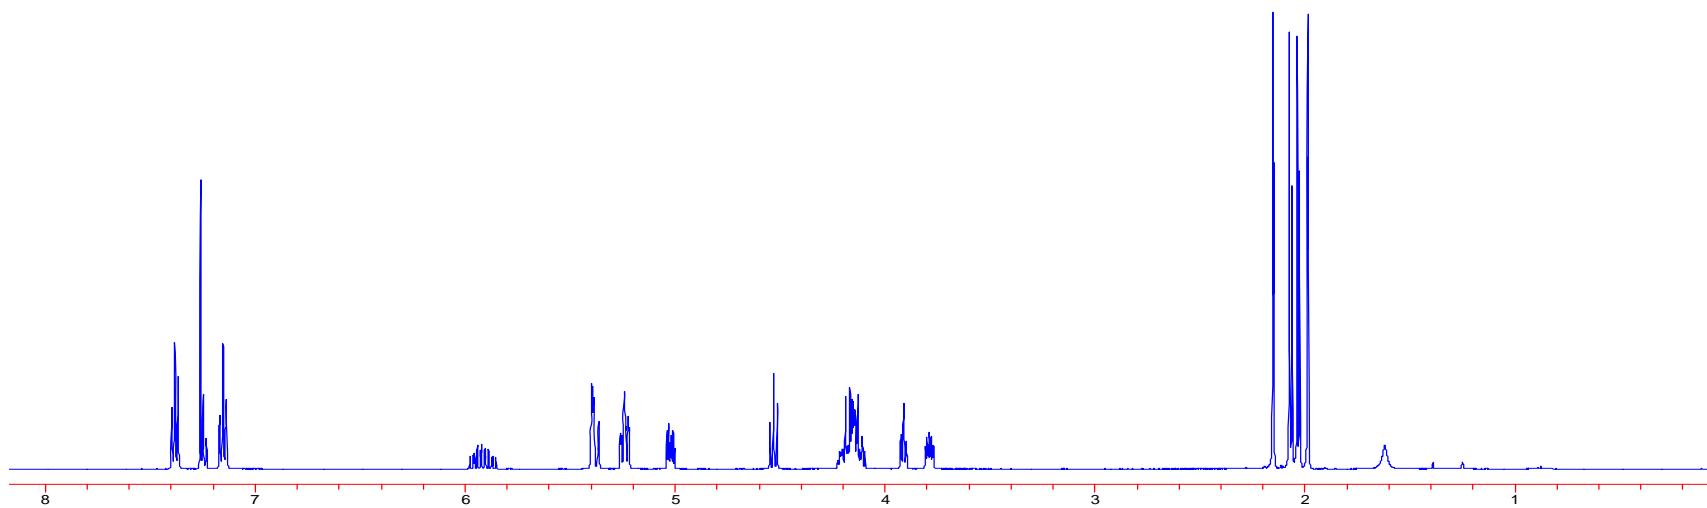

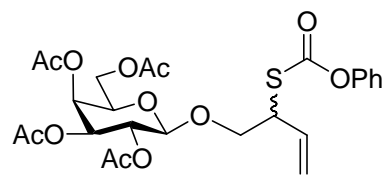

4b  $^{13}\text{C}$  NMR (125 MHz,  $\text{CDCl}_3$ )

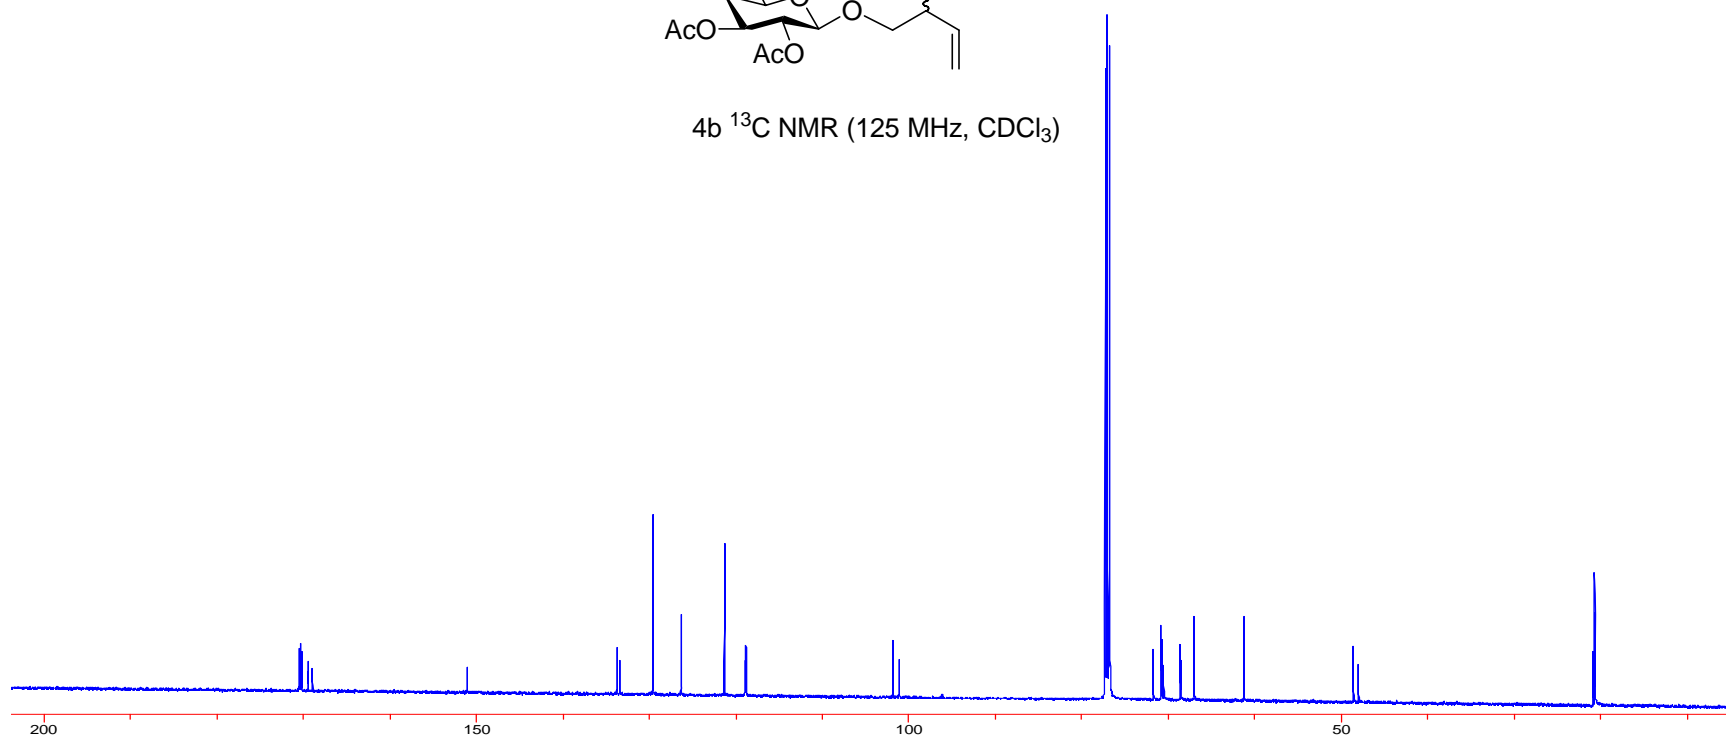

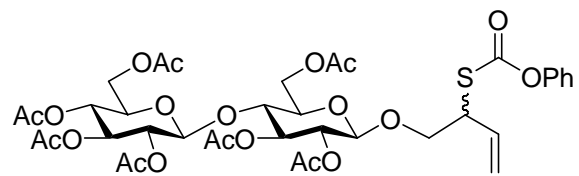

4c <sup>1</sup>H NMR (500 MHz, CDCl<sub>3</sub>)

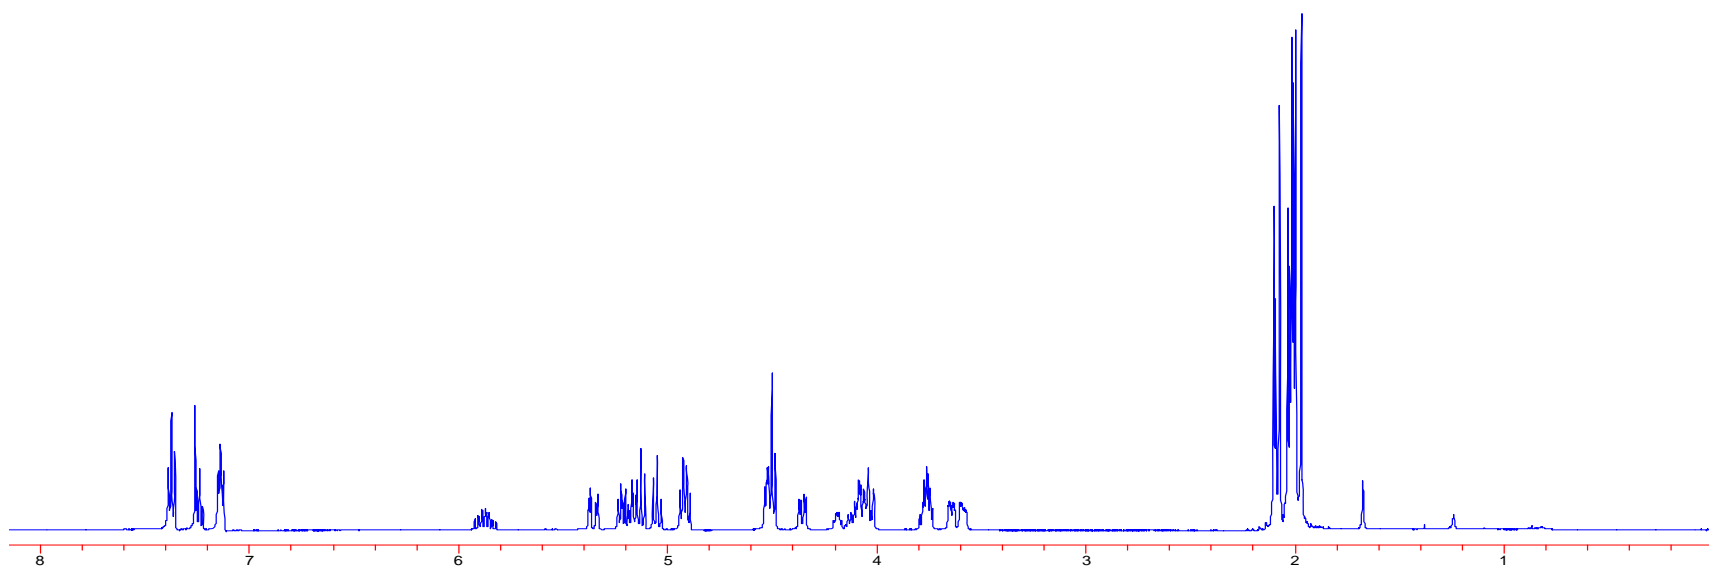

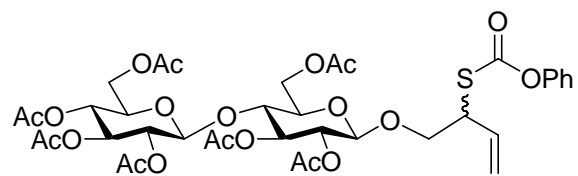

4c  $^{13}\text{C}$  NMR (125 MHz,  $\text{CDCl}_3$ )

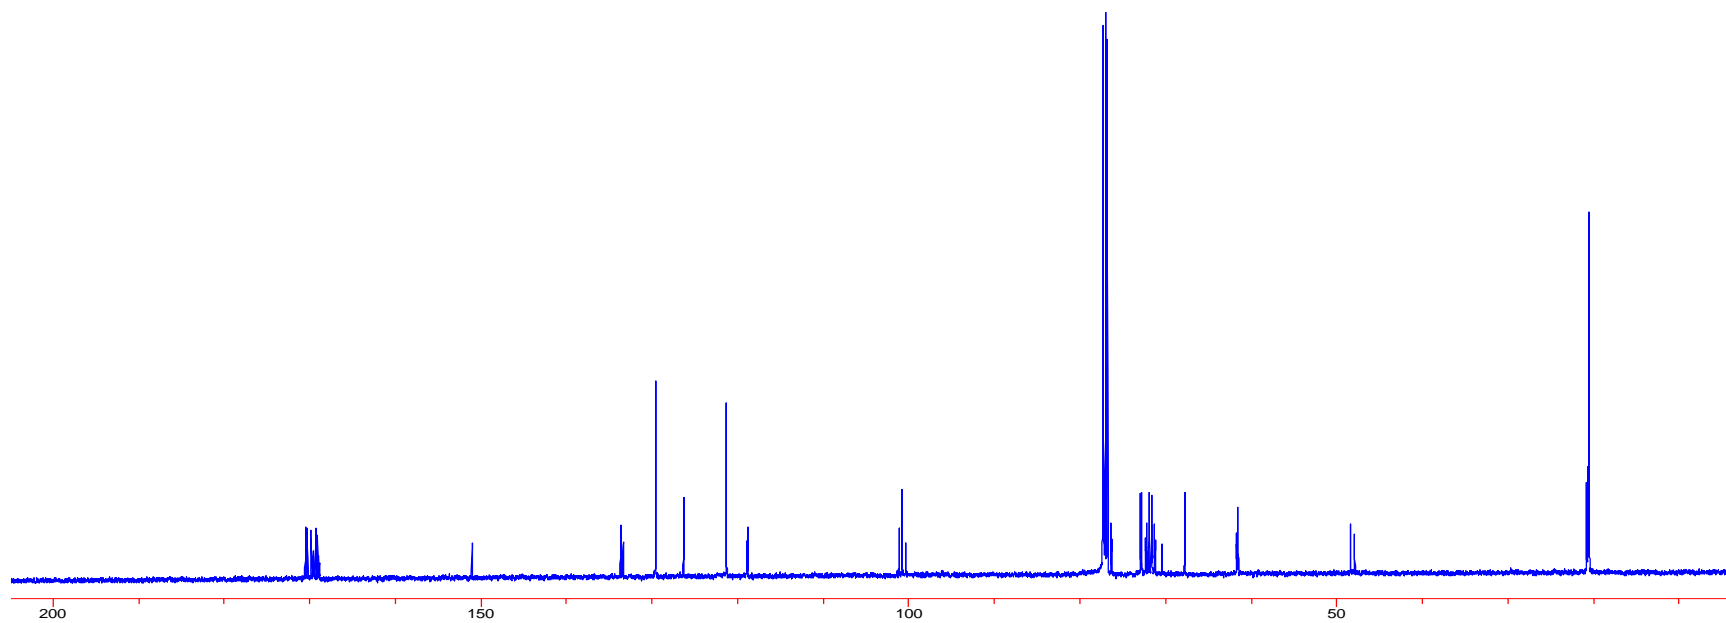



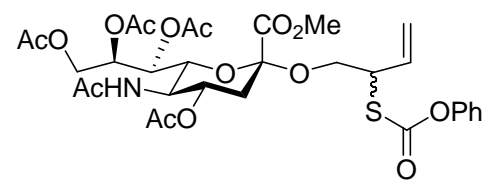

9 <sup>1</sup>H NMR (500 MHz, CDCl<sub>3</sub>)

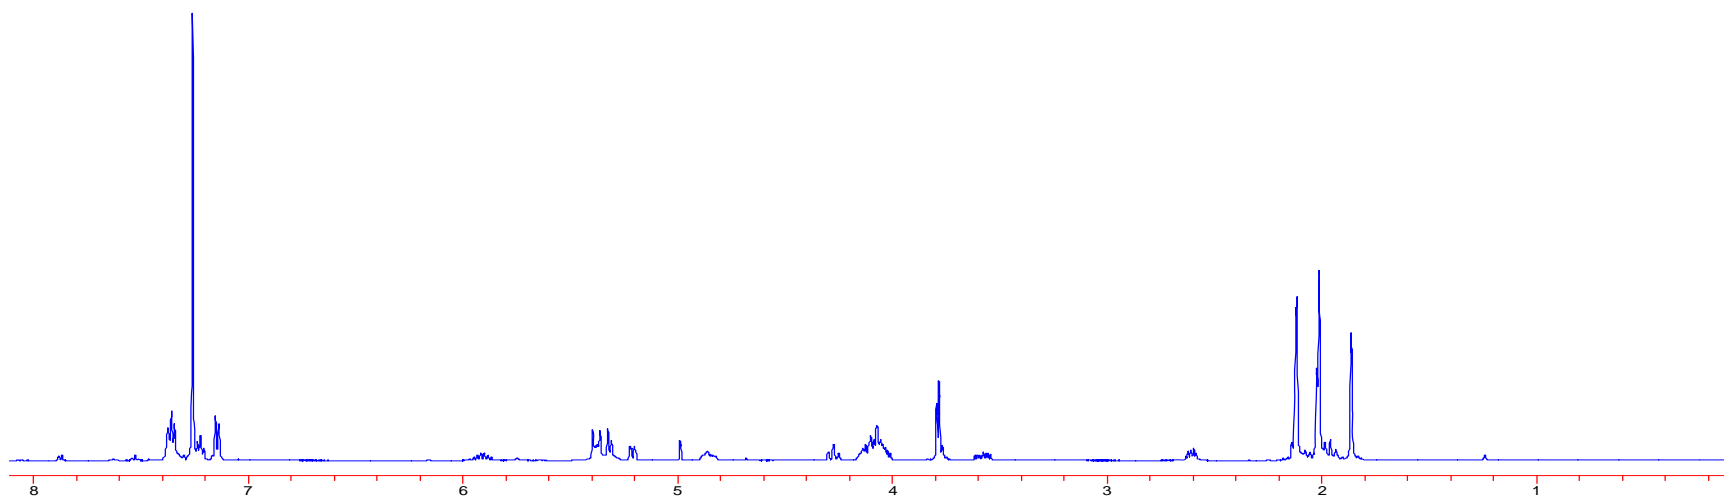

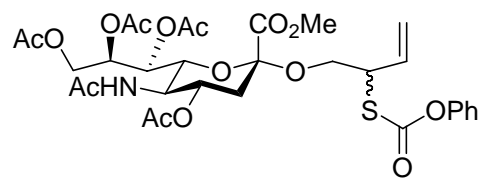

9 <sup>13</sup>C NMR (125 MHz, CDCl<sub>3</sub>)

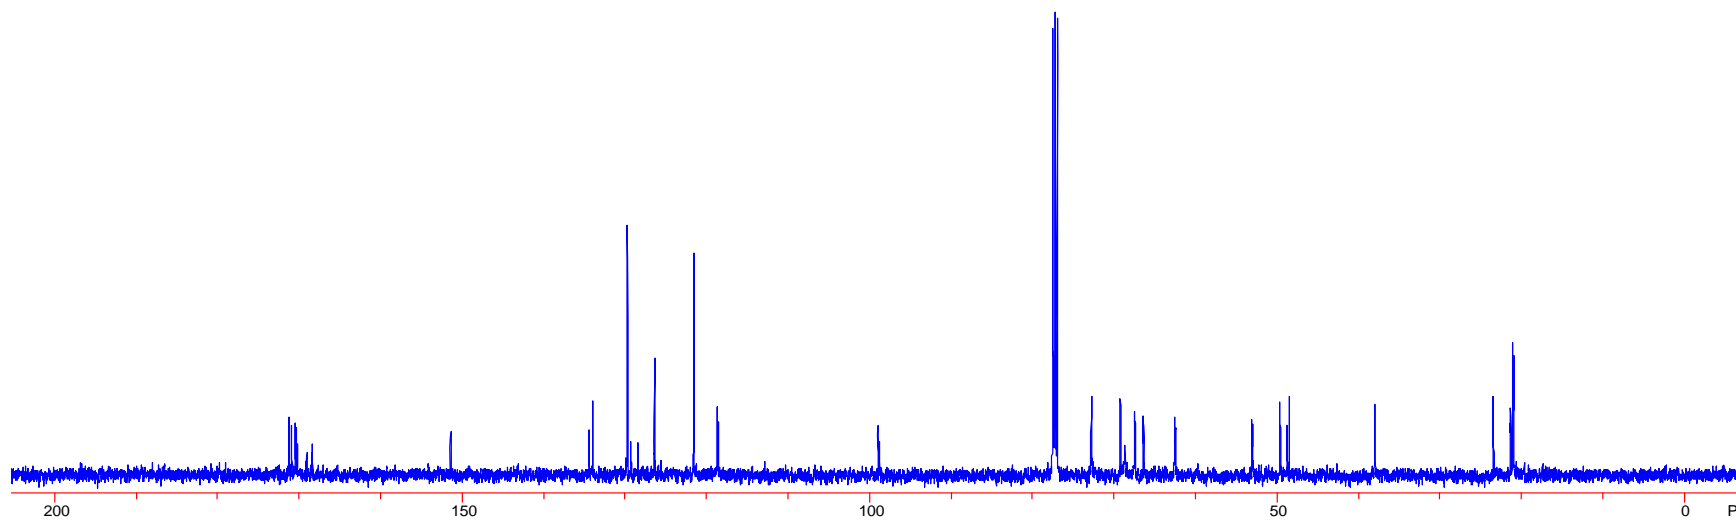

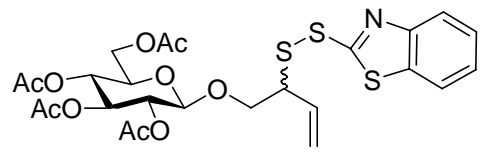

5a  $^1\text{H}$  NMR (500 MHz,  $\text{CDCl}_3$ )

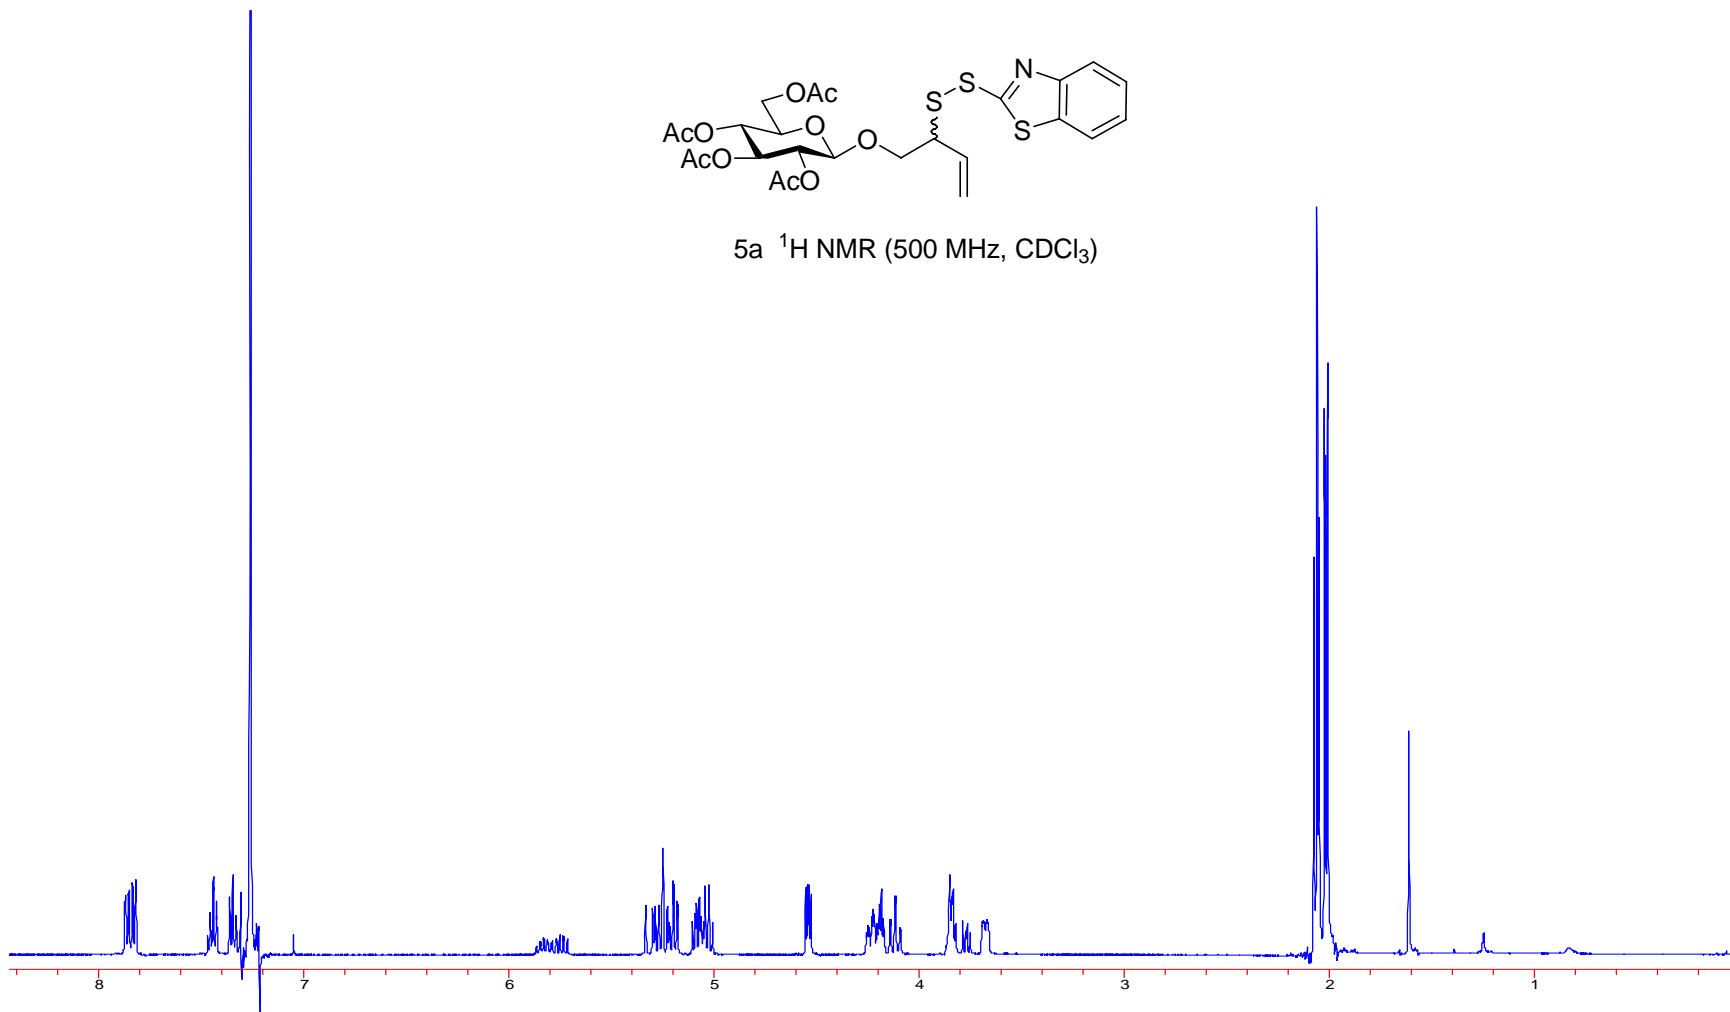

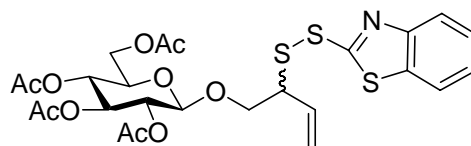

5a  $^{13}\text{C}$  NMR (125 MHz,  $\text{CDCl}_3$ )

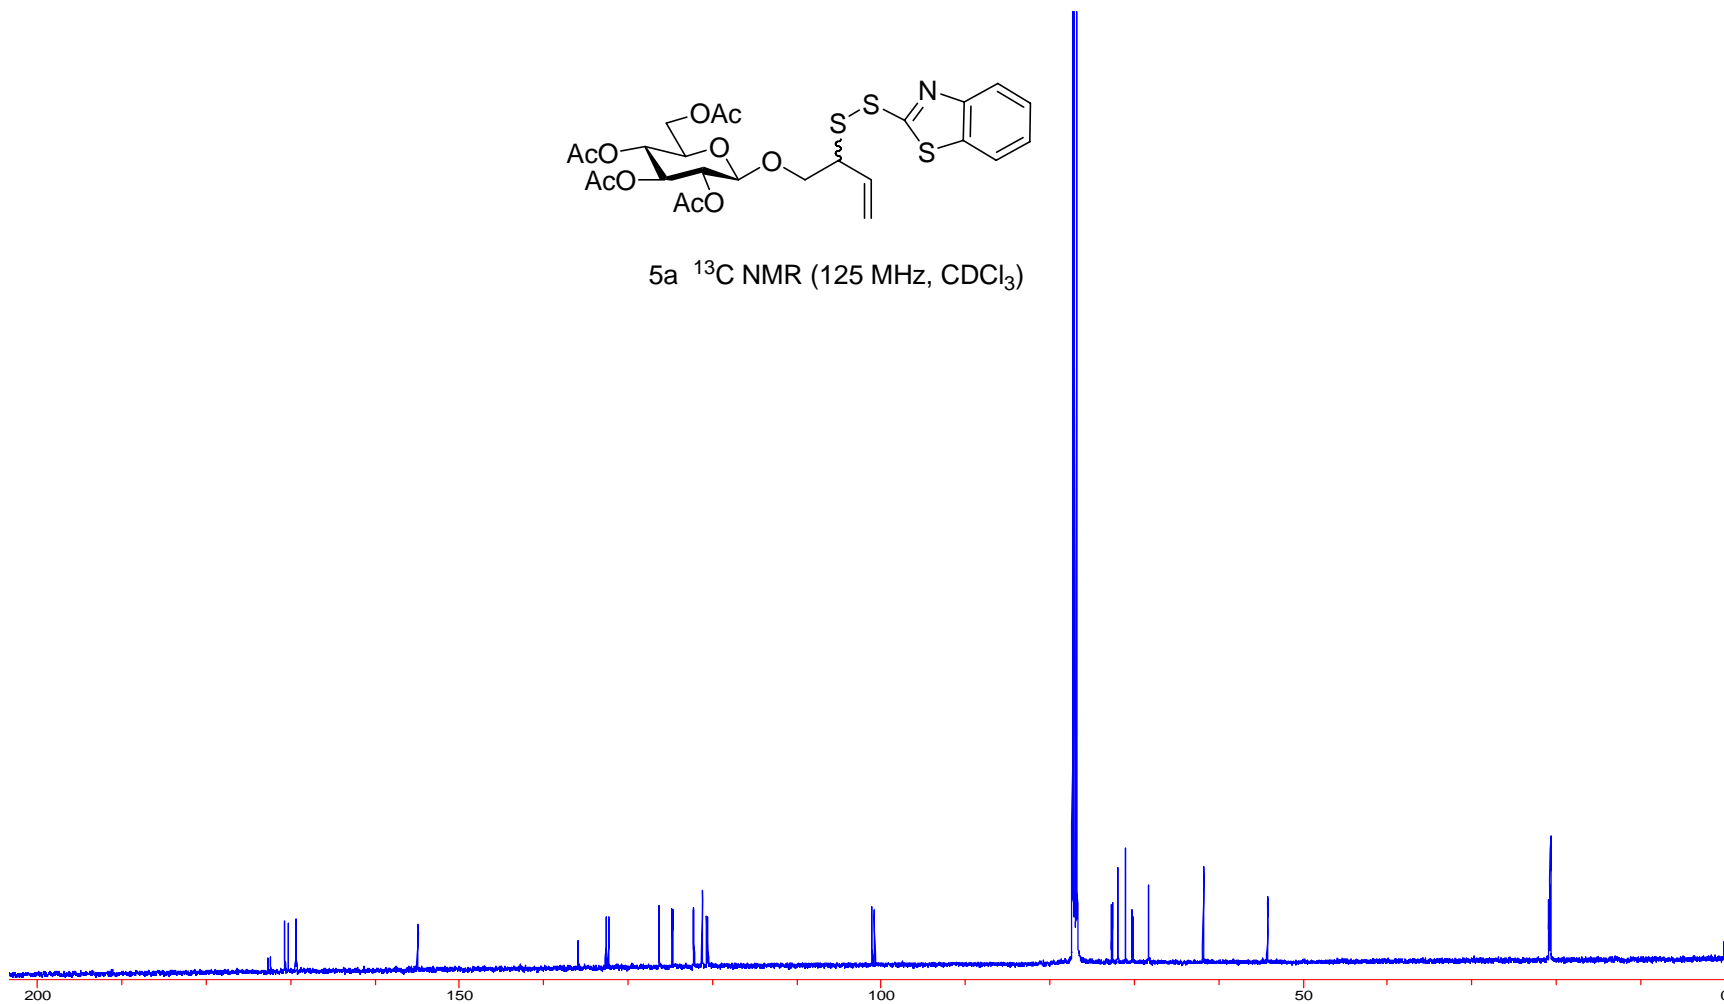



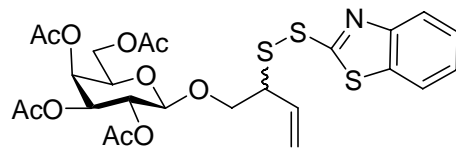

5b  $^{13}\text{C}$  NMR (125 MHz,  $\text{CDCl}_3$ )

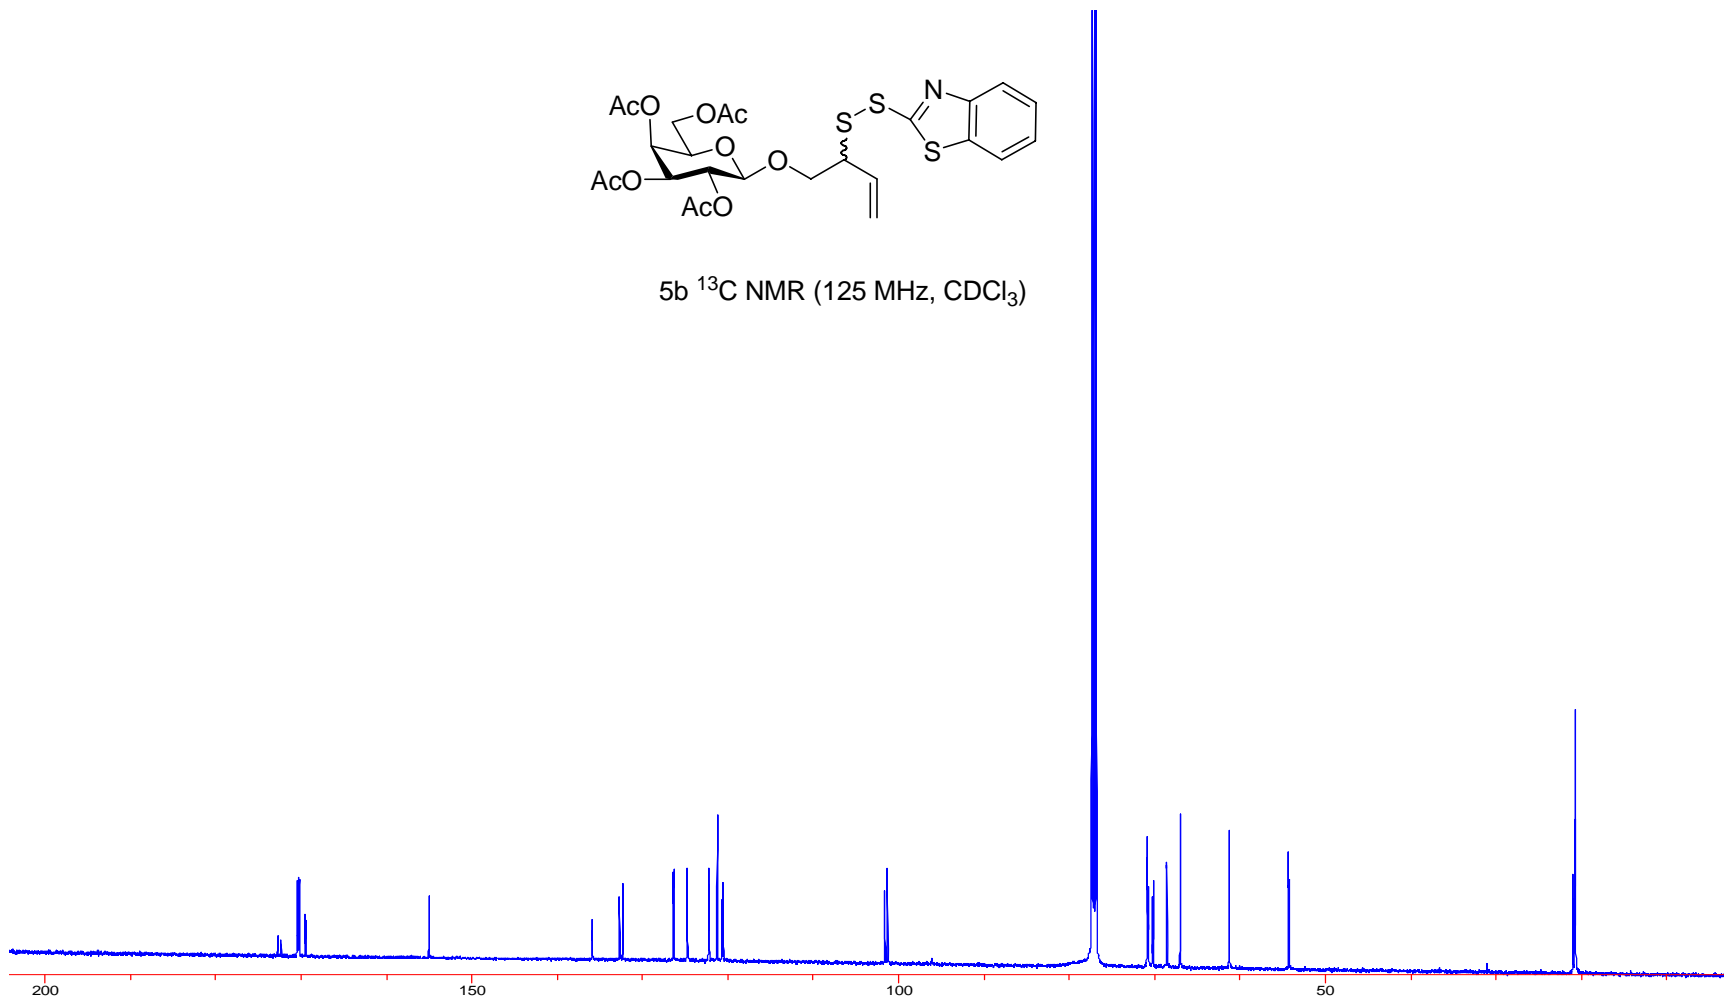

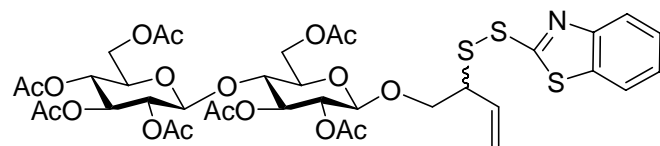

5c  $^1\text{H}$  NMR (500 MHz,  $\text{CDCl}_3$ )

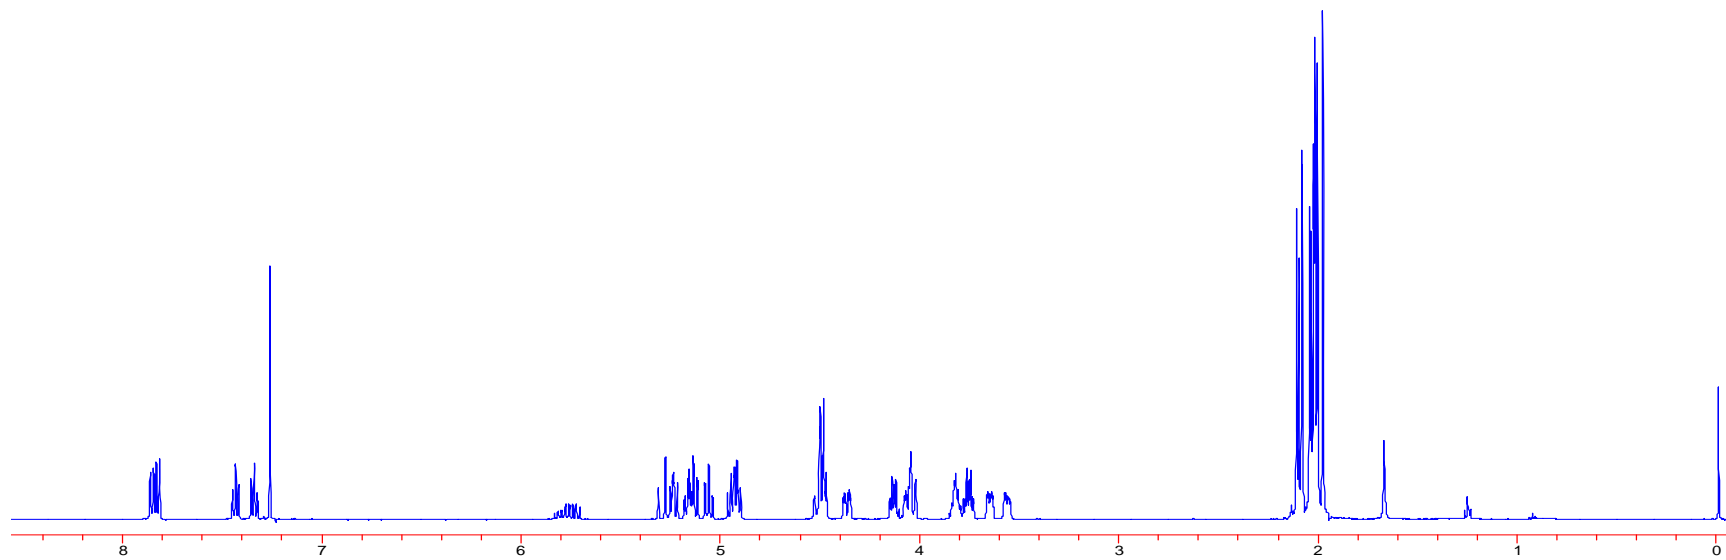

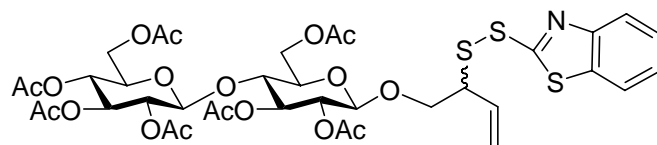

5c  $^{13}\text{C}$  NMR (125 MHz,  $\text{CDCl}_3$ )

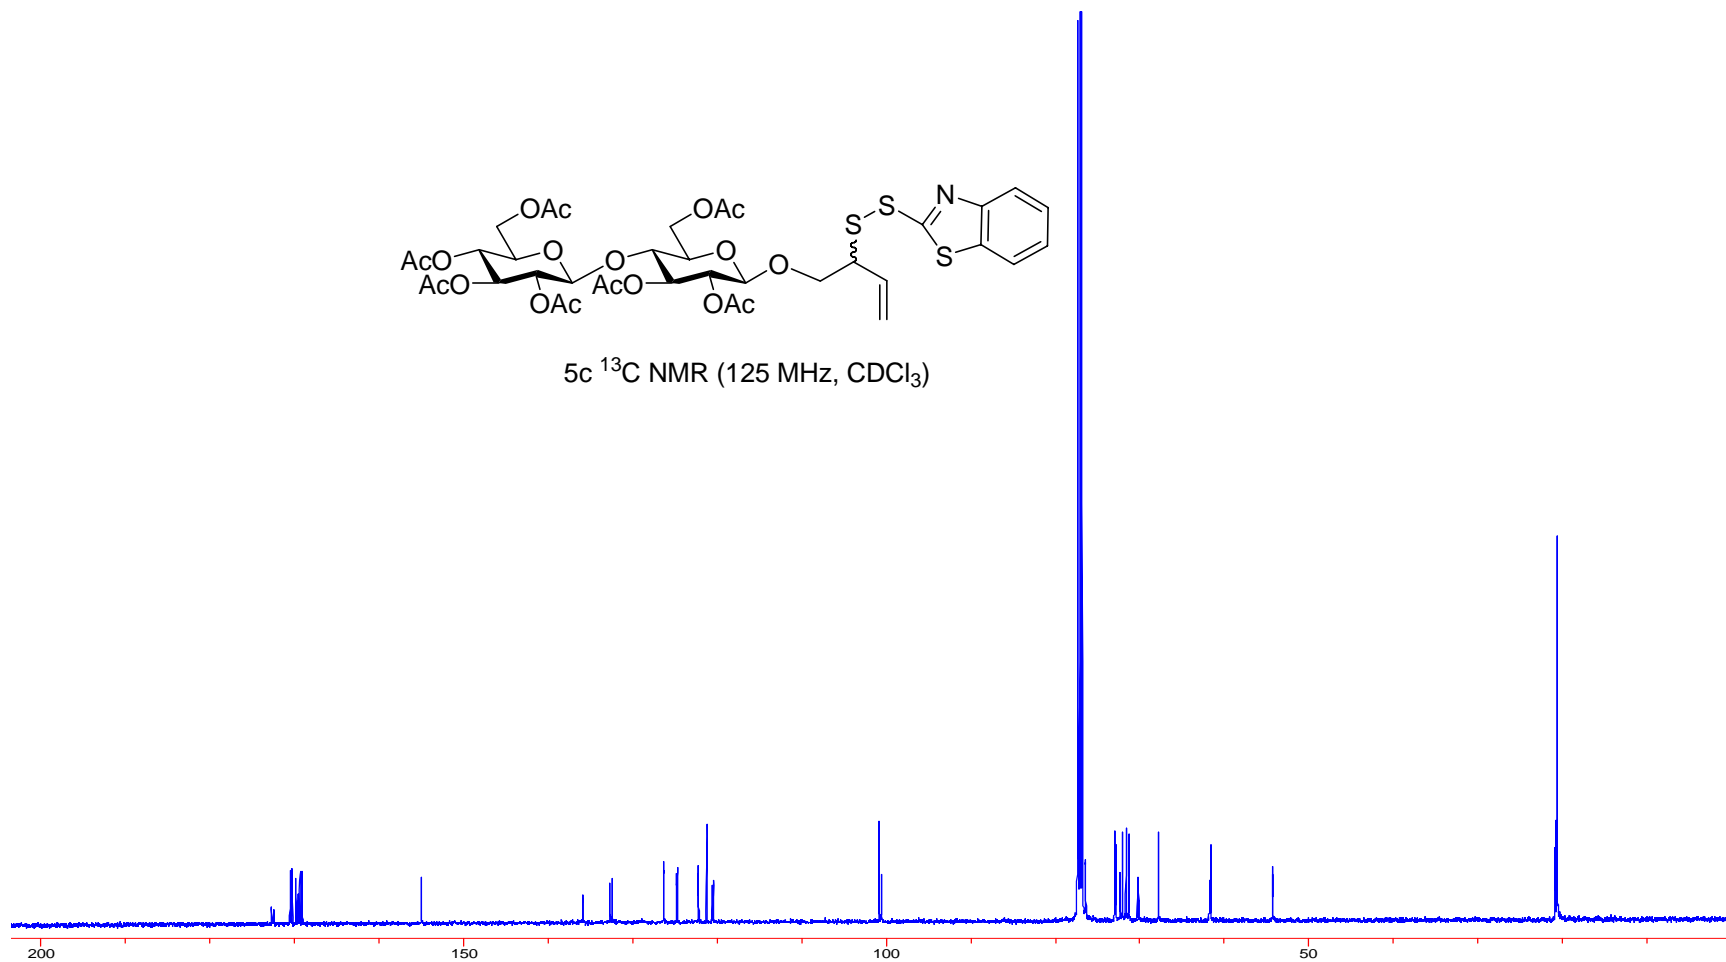



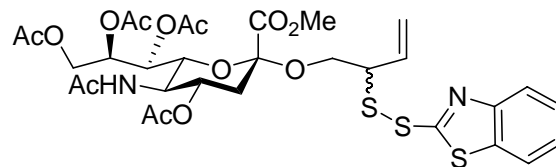

10  $^1\text{H}$  NMR (500 MHz,  $\text{CDCl}_3$ )

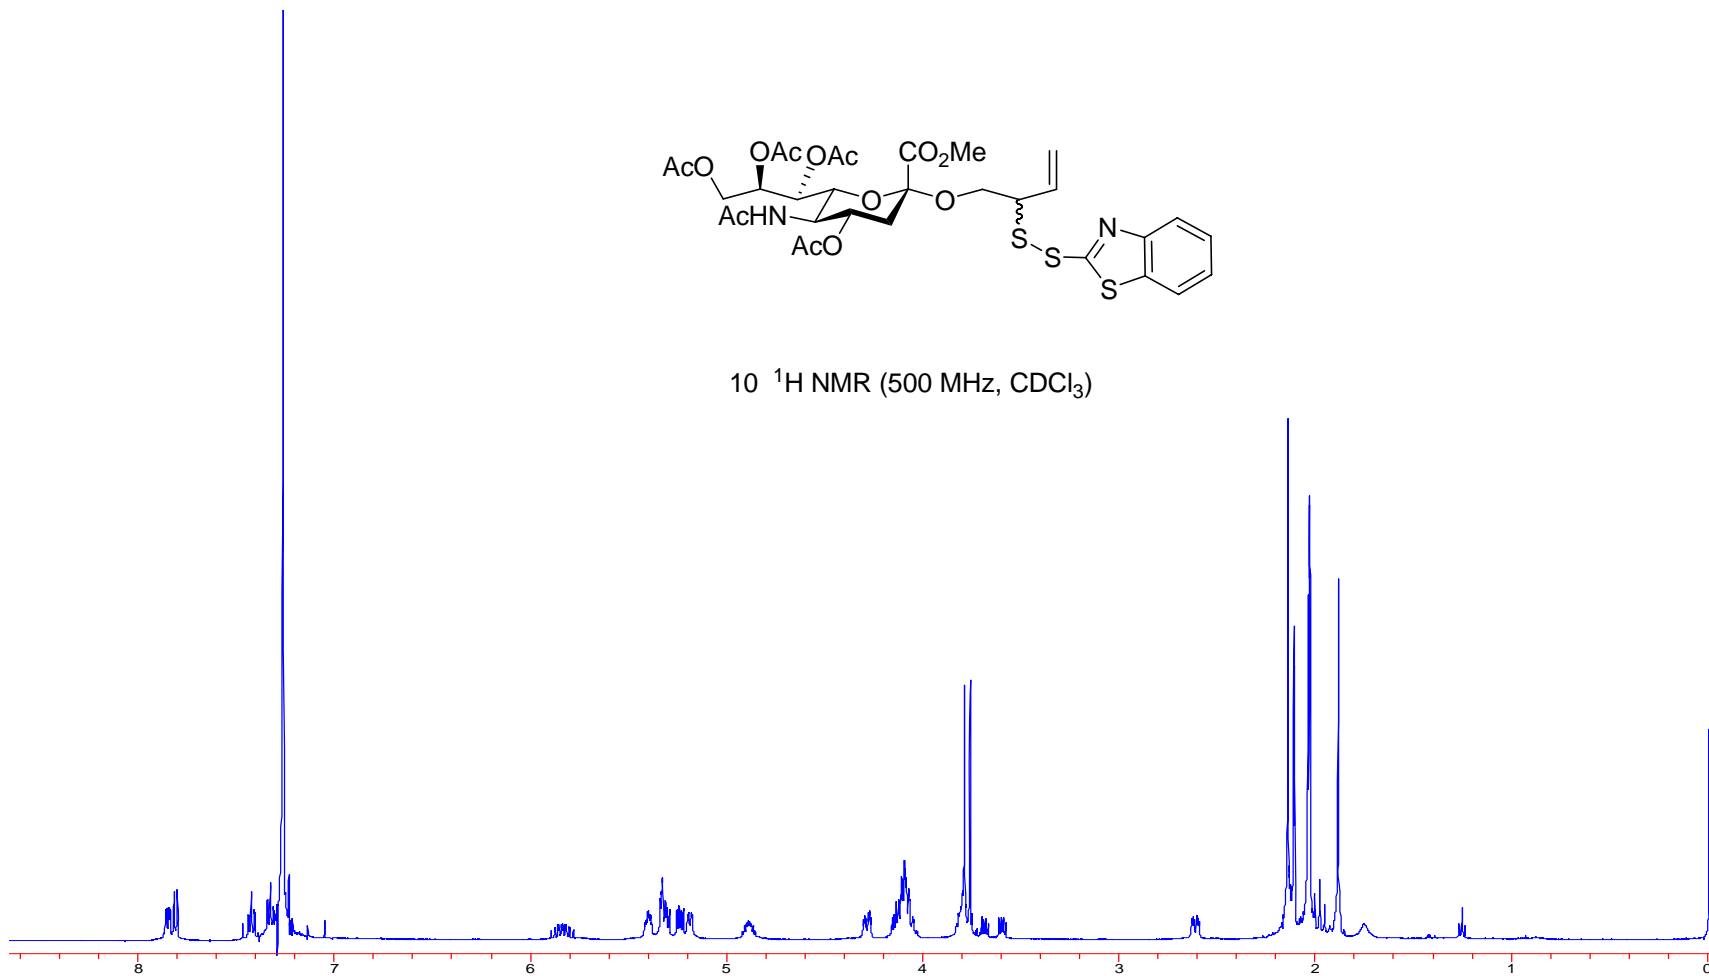

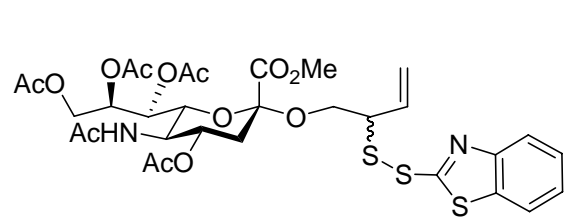

10 <sup>13</sup>C NMR (125 MHz, CDCl<sub>3</sub>)

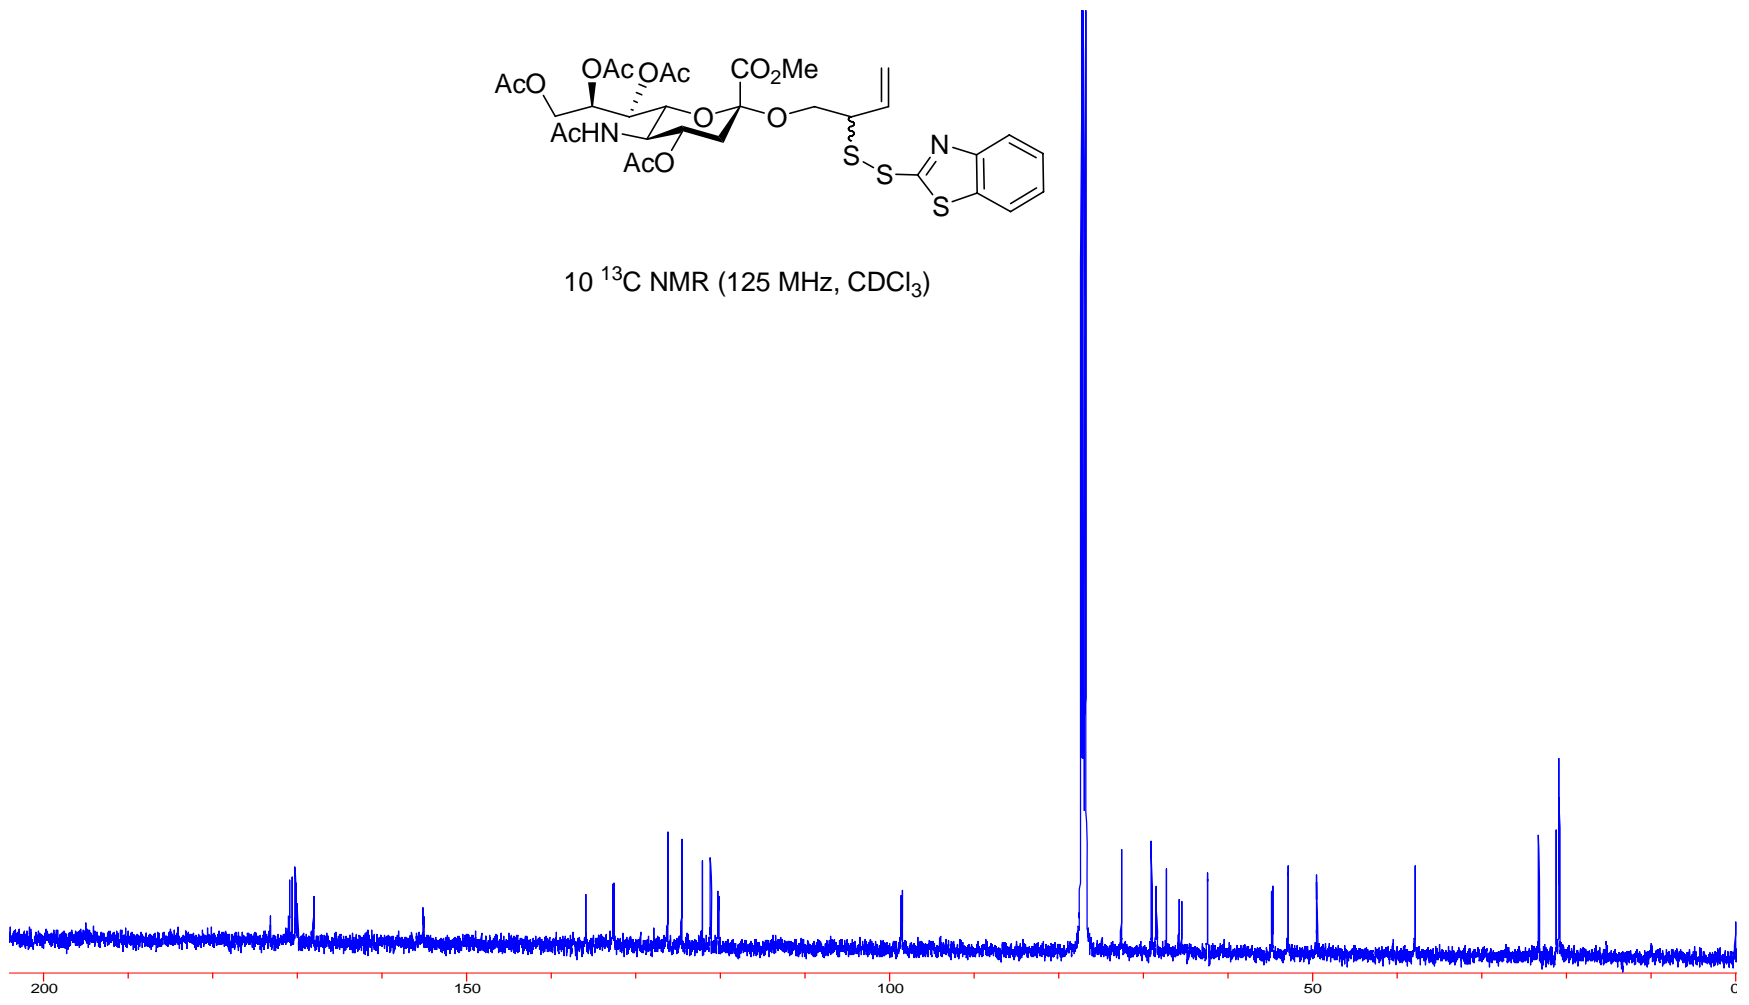

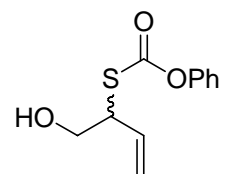

12  $^1\text{H}$  NMR (500 MHz,  $\text{CDCl}_3$ )

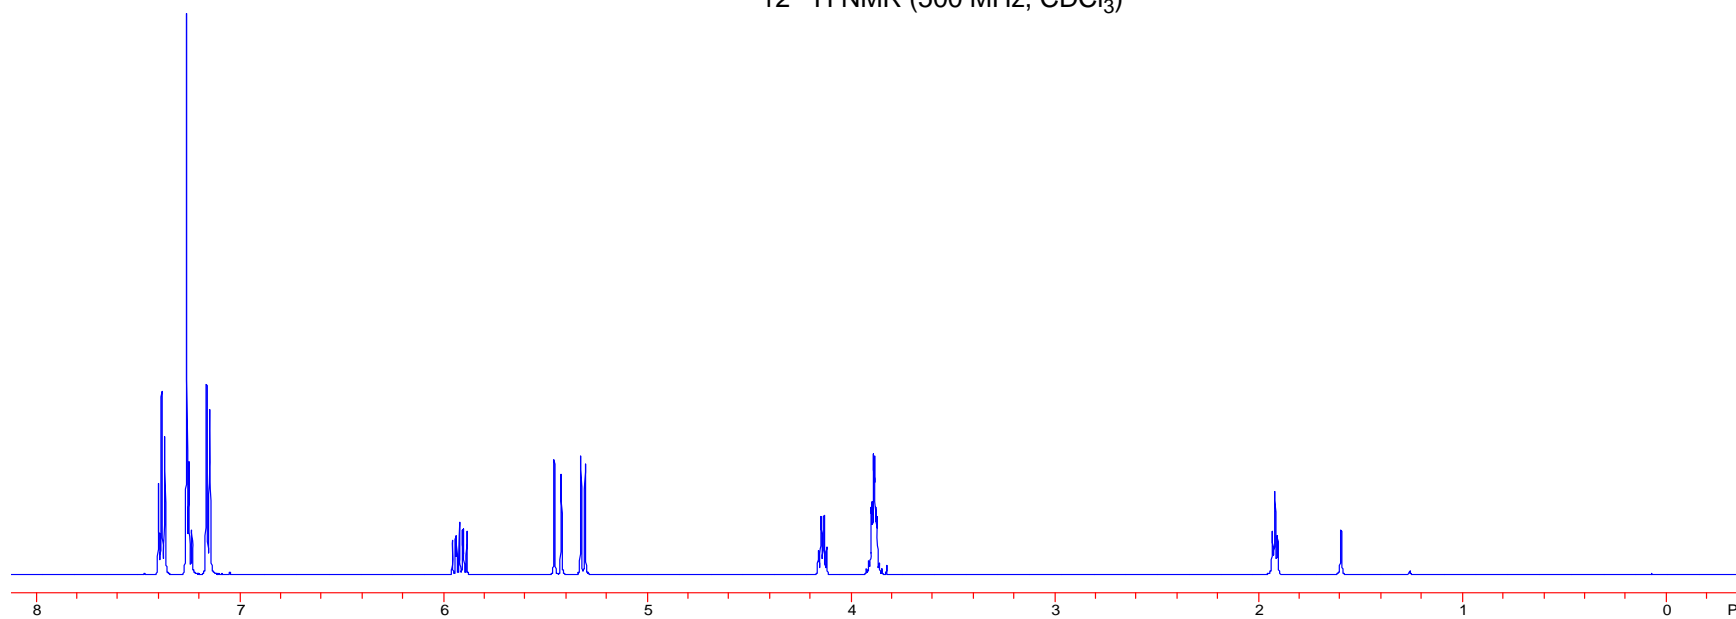

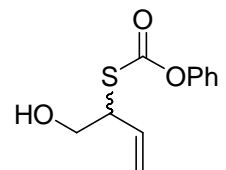

12  $^{13}\text{C}$  NMR (125 MHz,  $\text{CDCl}_3$ )

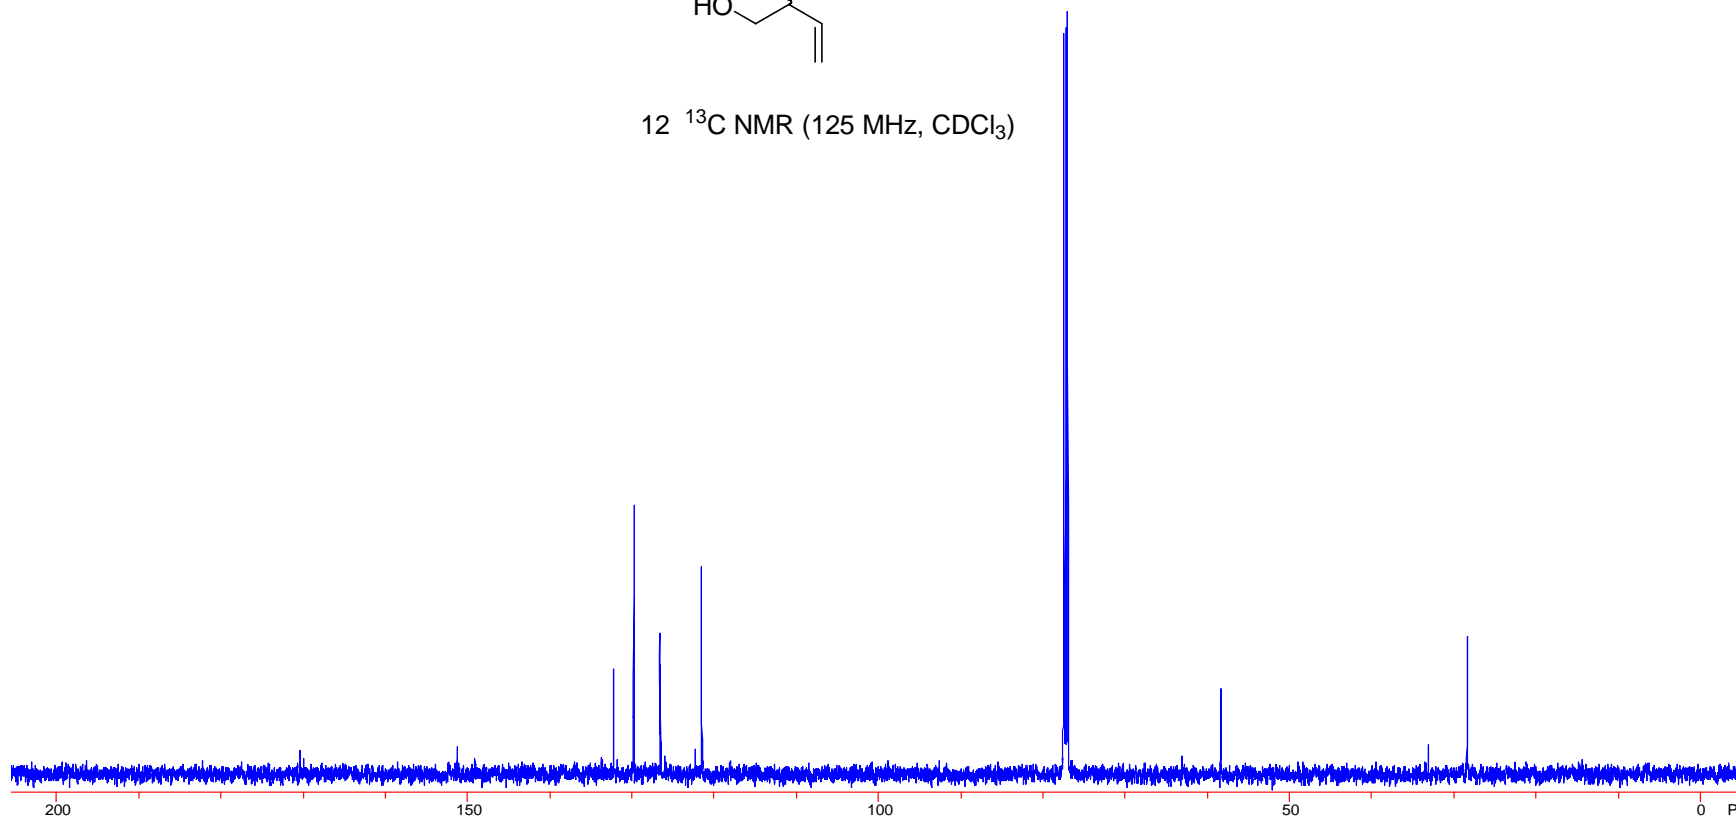





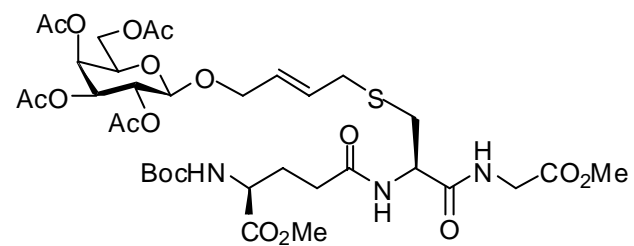

17 <sup>1</sup>H NMR (500 MHz, MeOD)

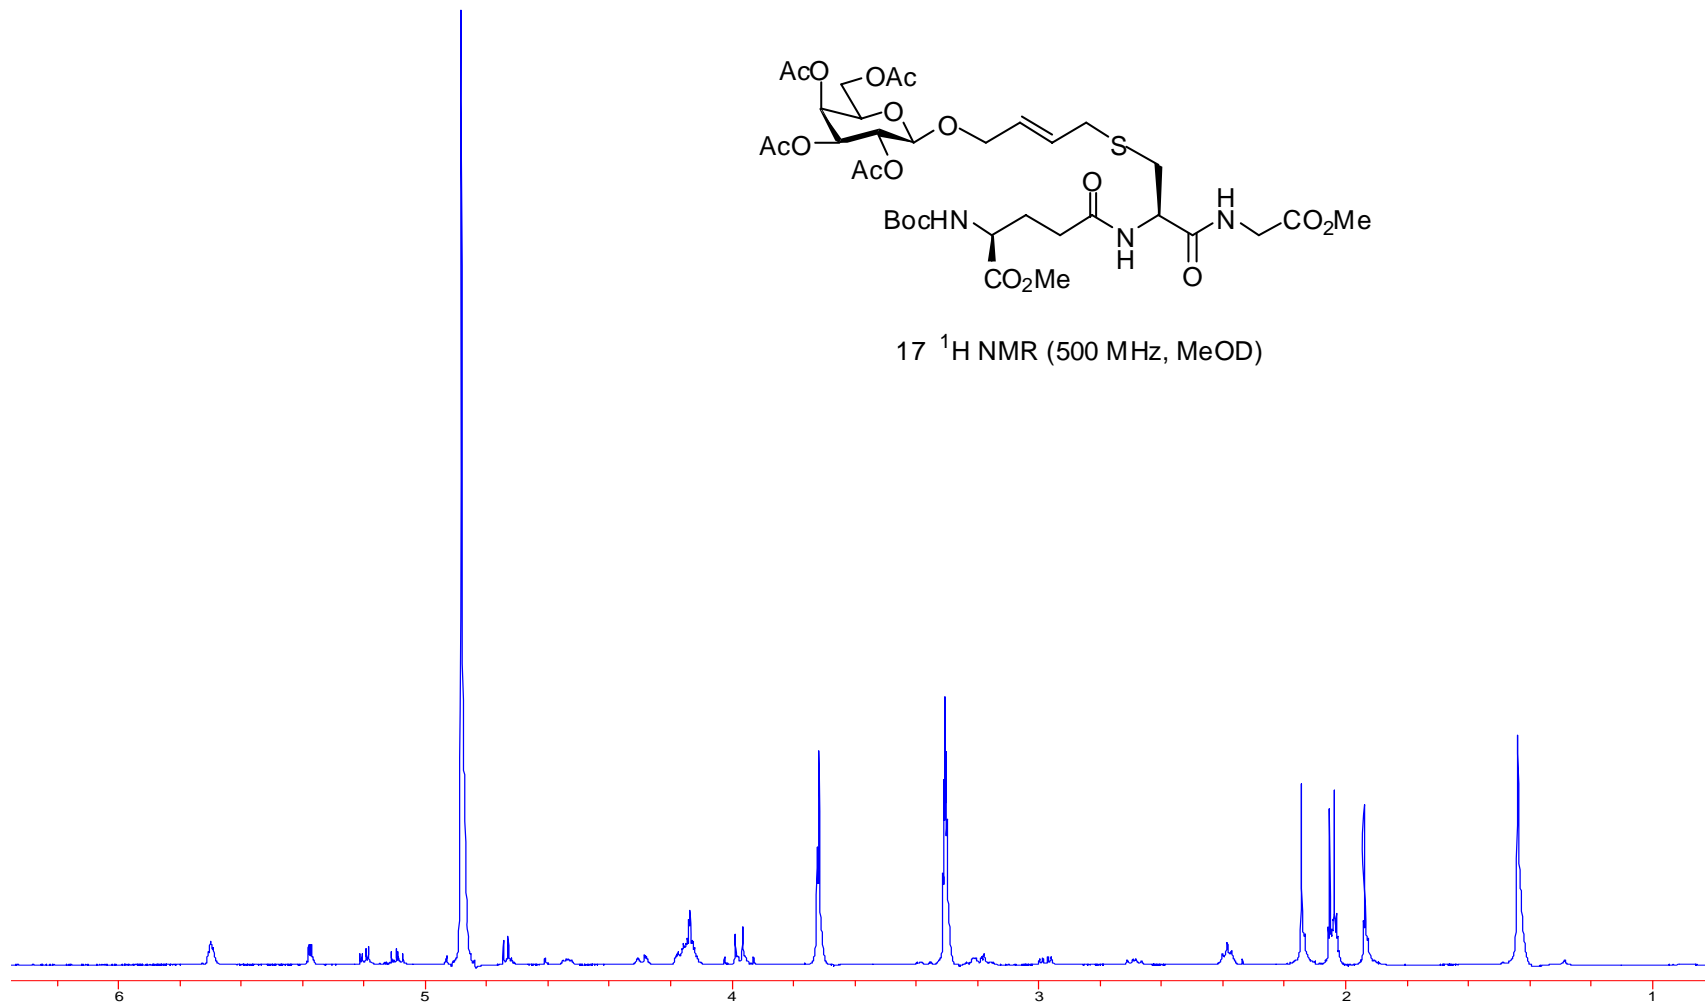

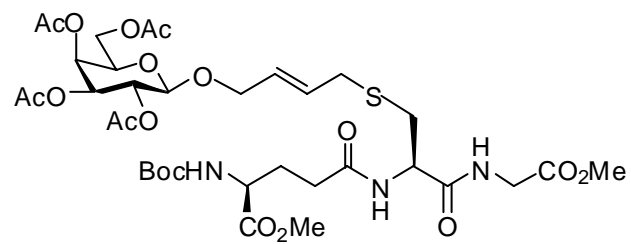

17  $^{13}\text{C}$  NMR (125 MHz, MeOD)

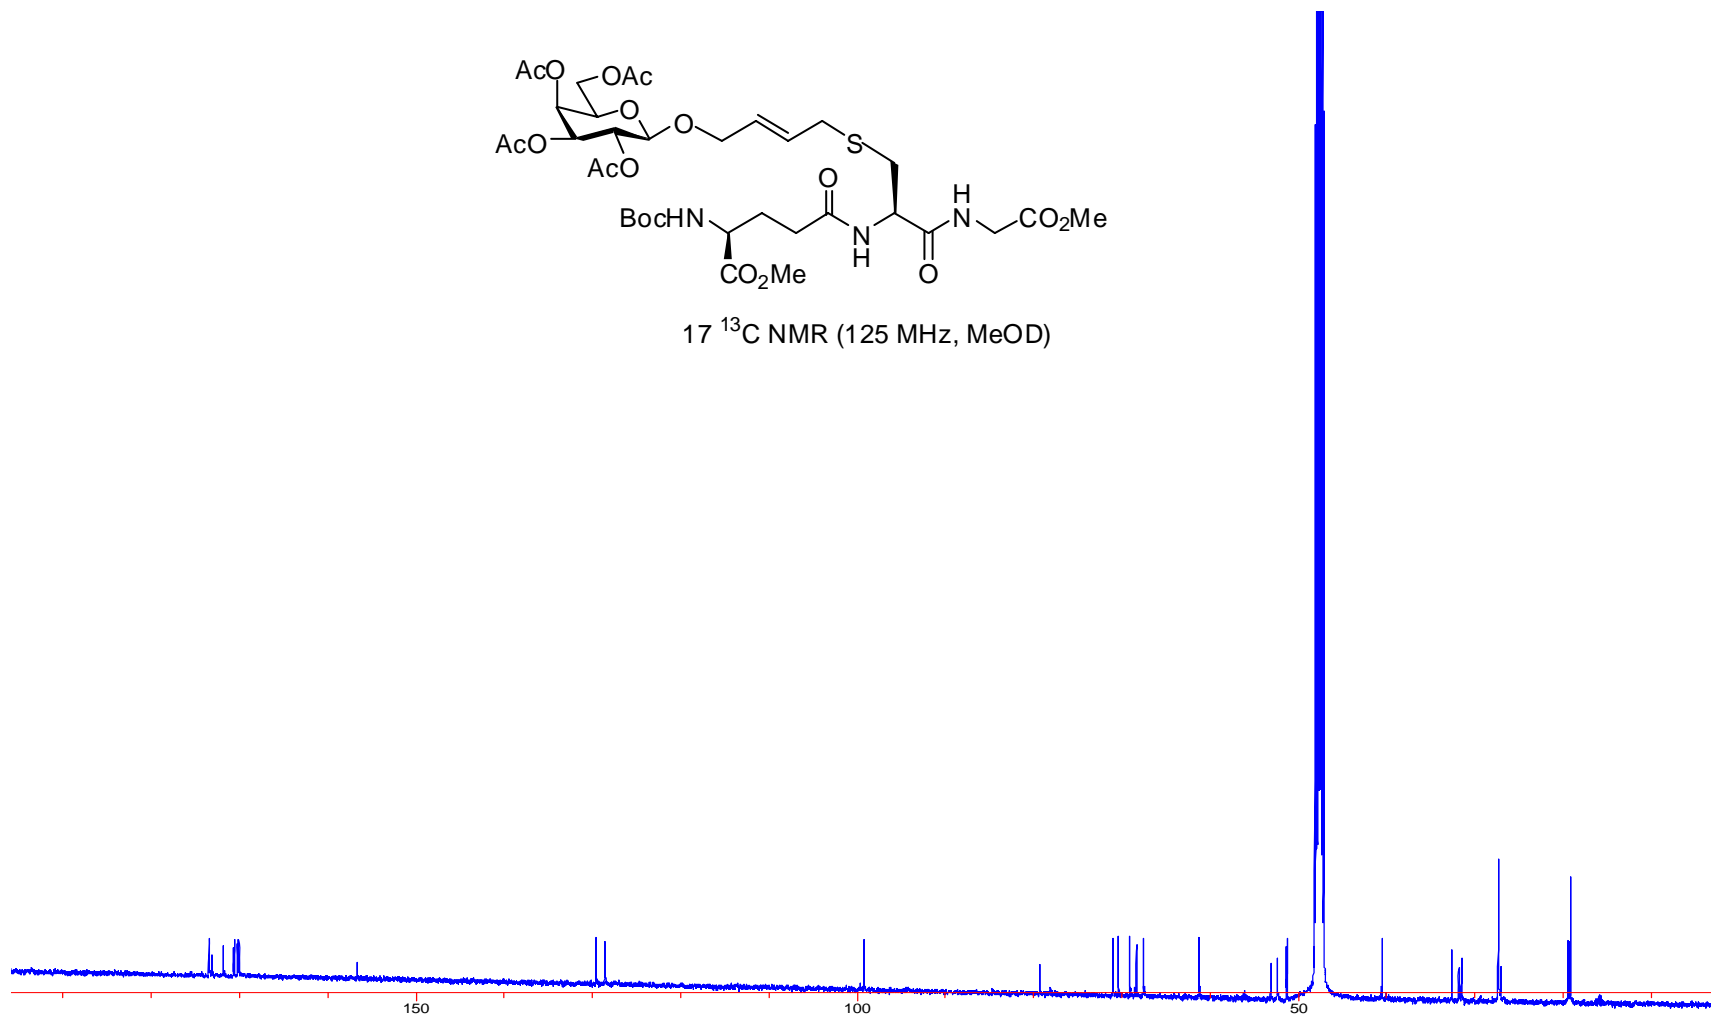







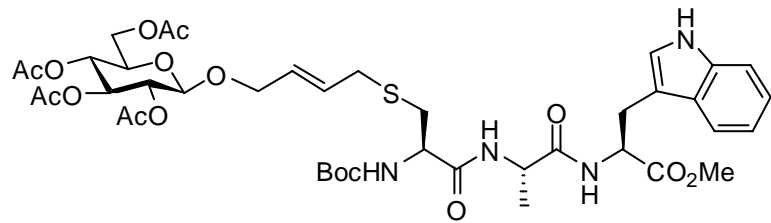

20  $^1\text{H}$  NMR (500 MHz, MeOD)

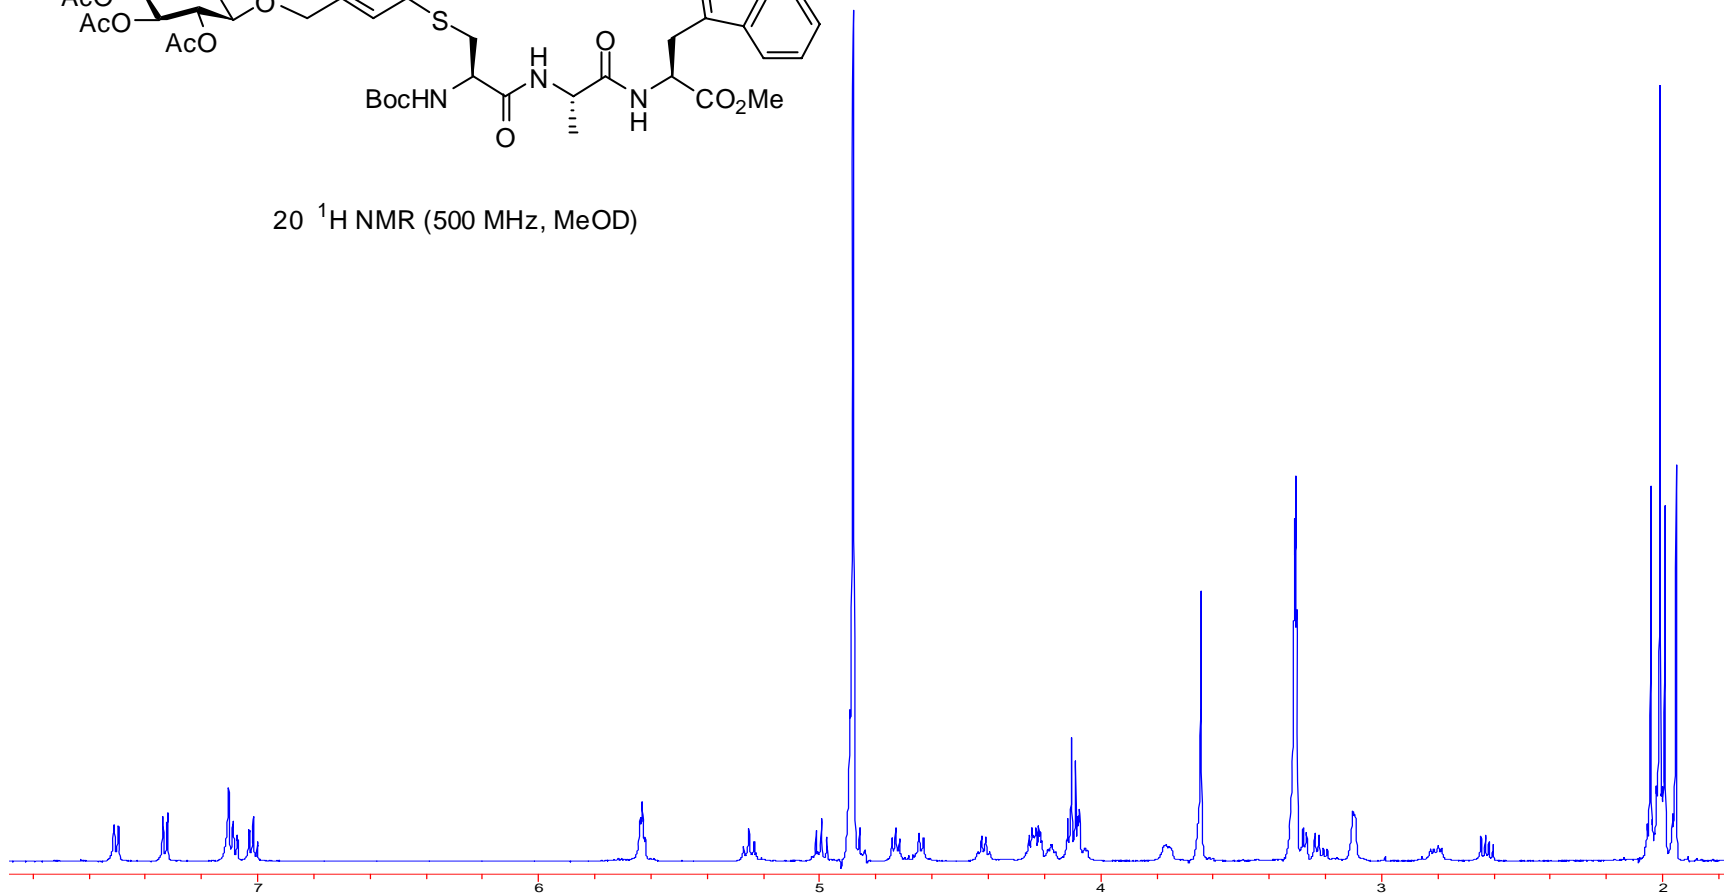

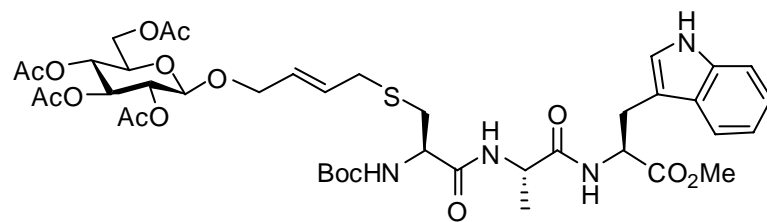

20  $^{13}\text{C}$  NMR (125 MHz, MeOD)

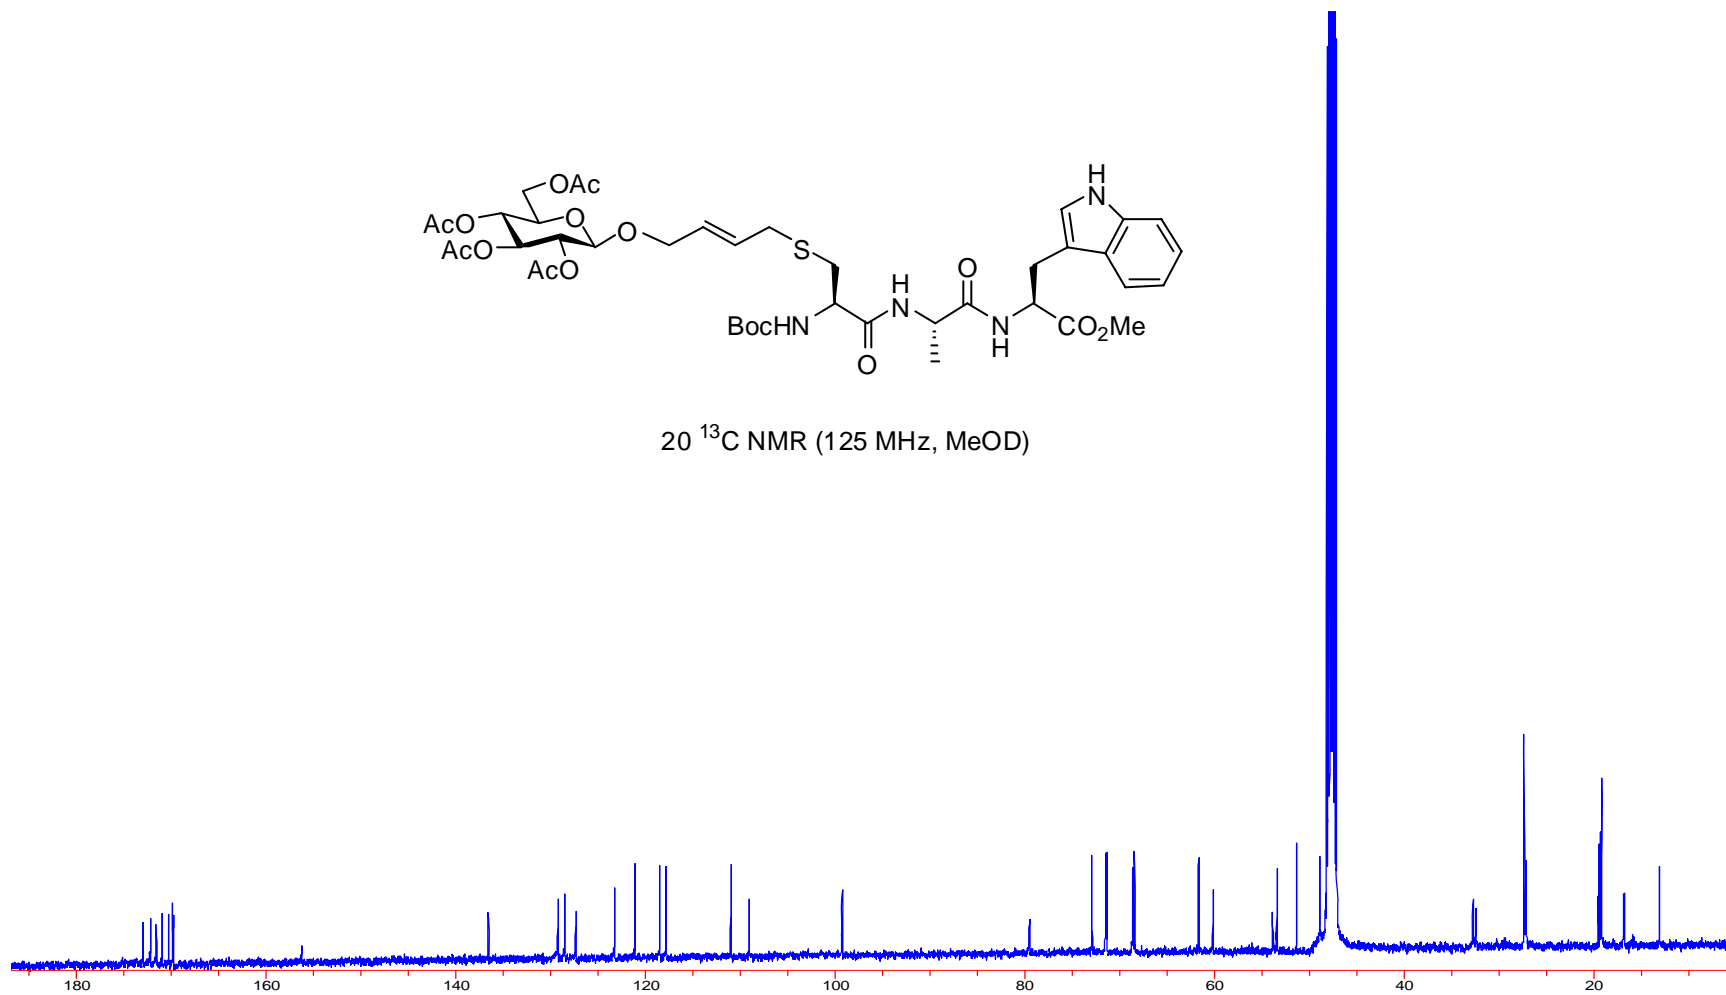



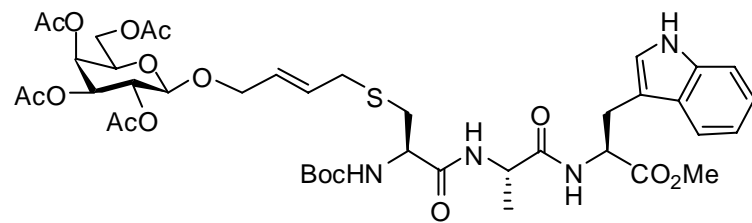

21  $^{13}\text{C}$  NMR (125 MHz,  $\text{CDCl}_3$ )

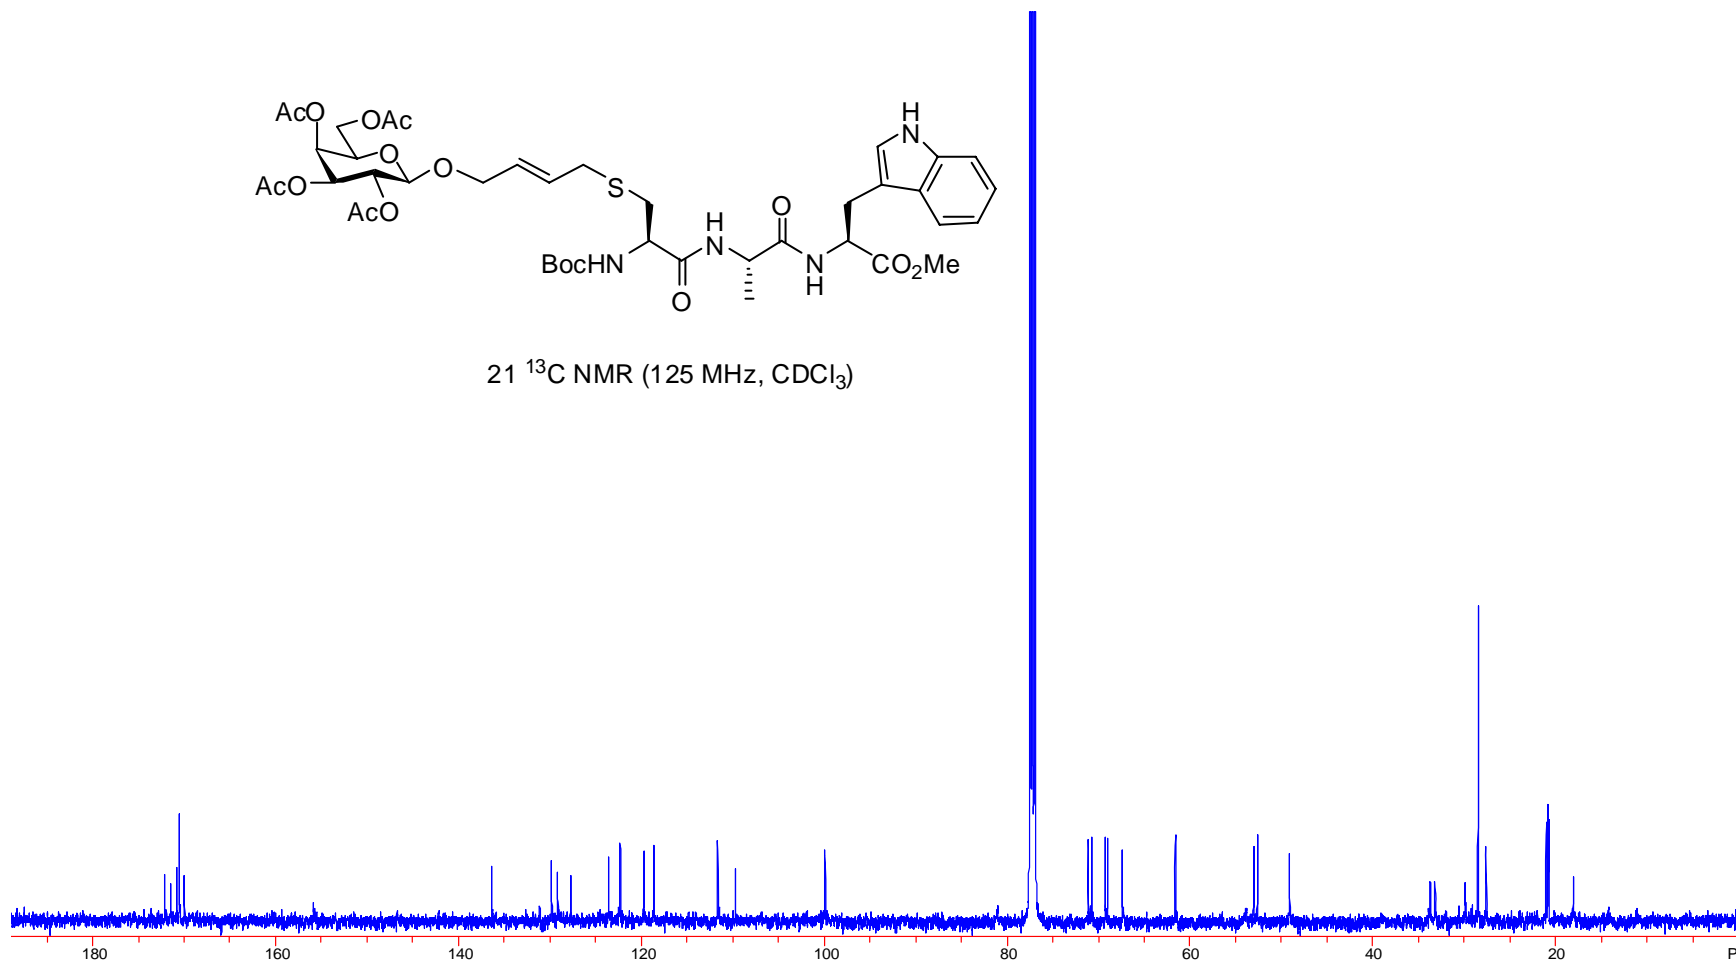

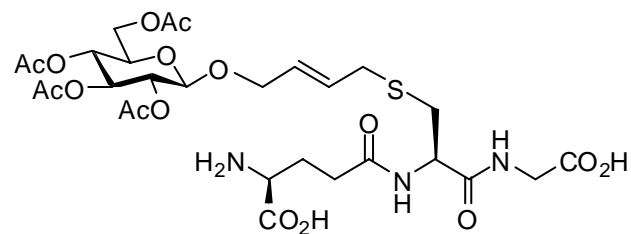

23  $^1\text{H}$  NMR (500 MHz,  $\text{D}_2\text{O}$ )

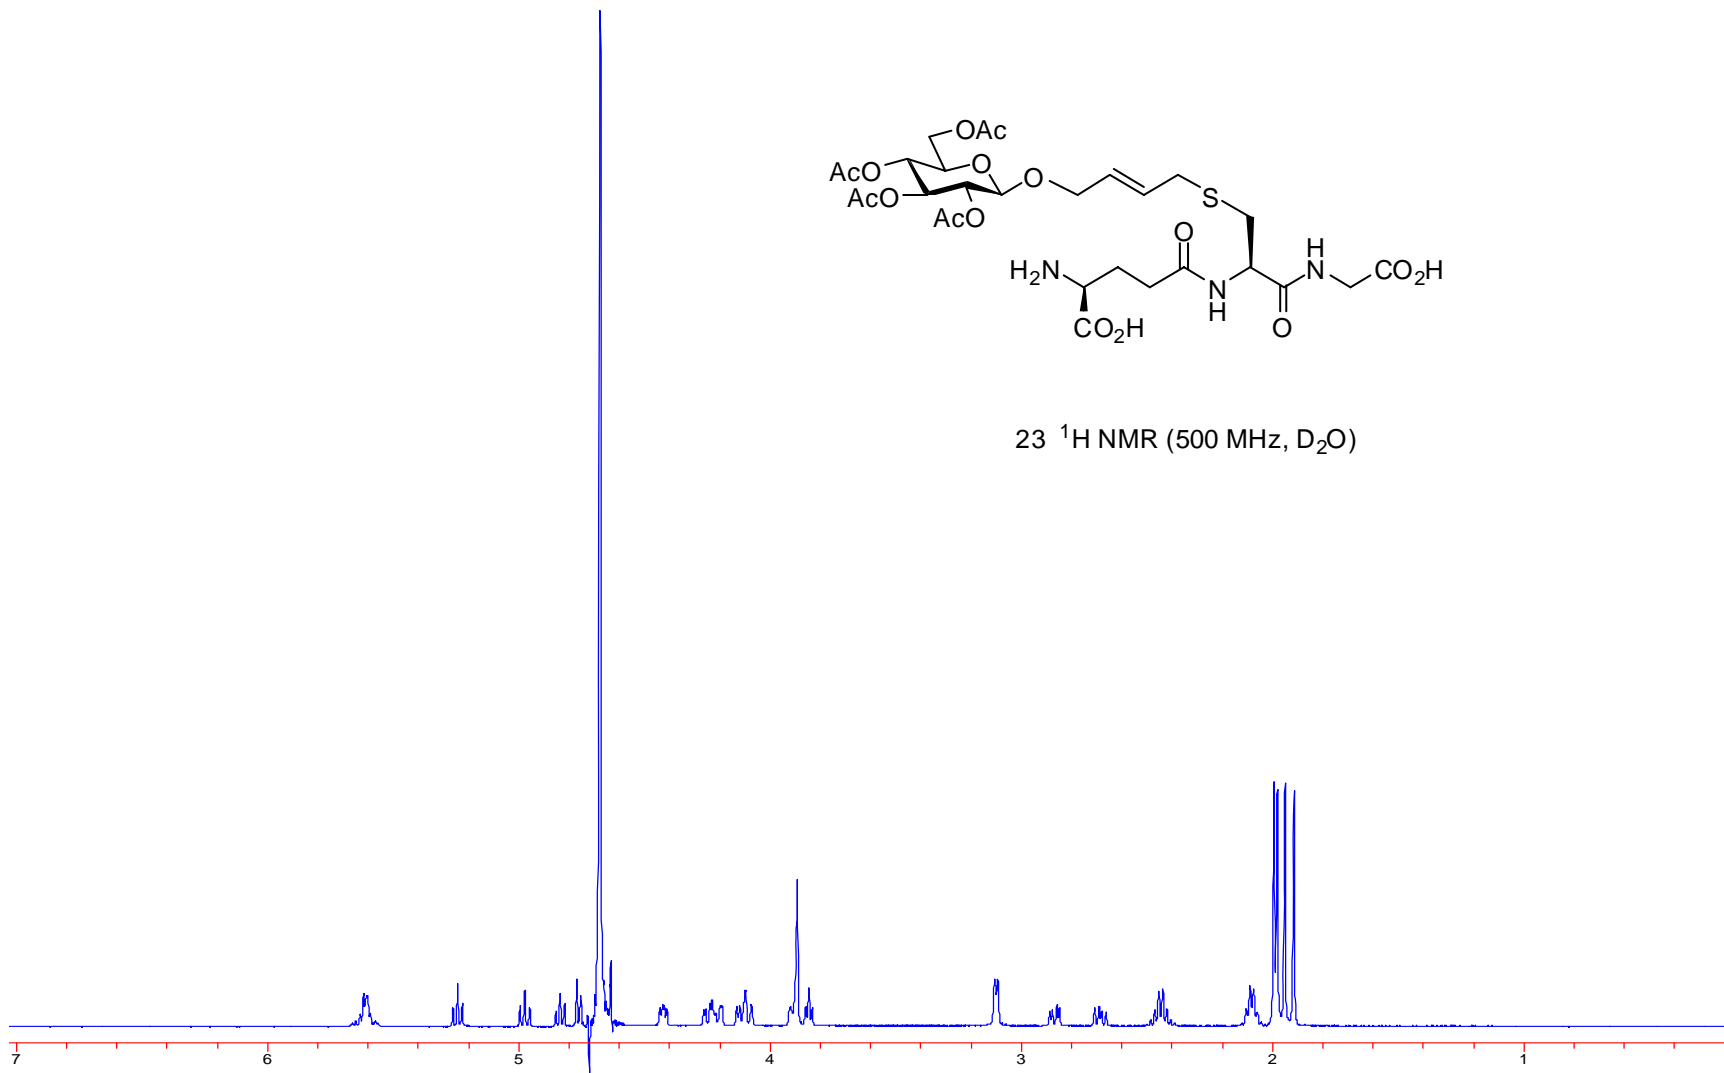

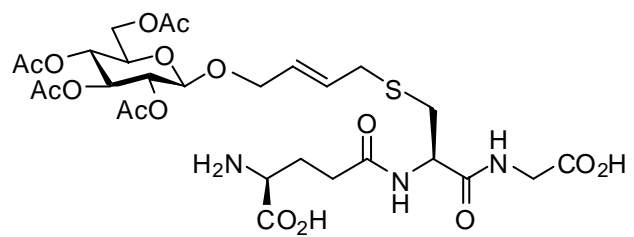

23 <sup>13</sup>C NMR (125 MHz, D<sub>2</sub>O)

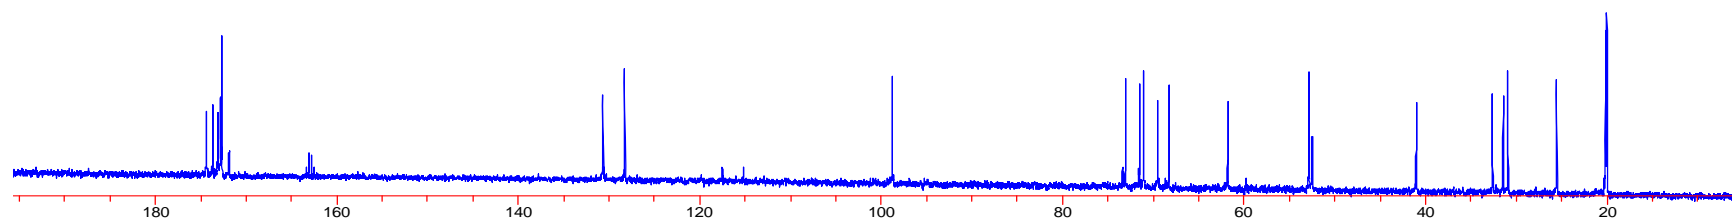



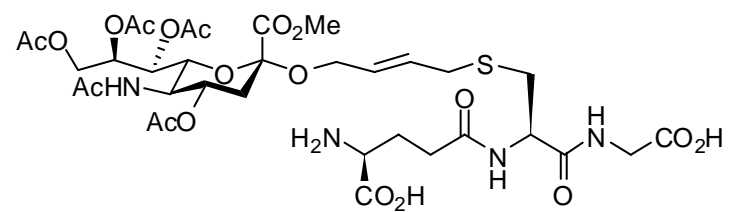

24 <sup>1</sup>H NMR (500 MHz, D<sub>2</sub>O)

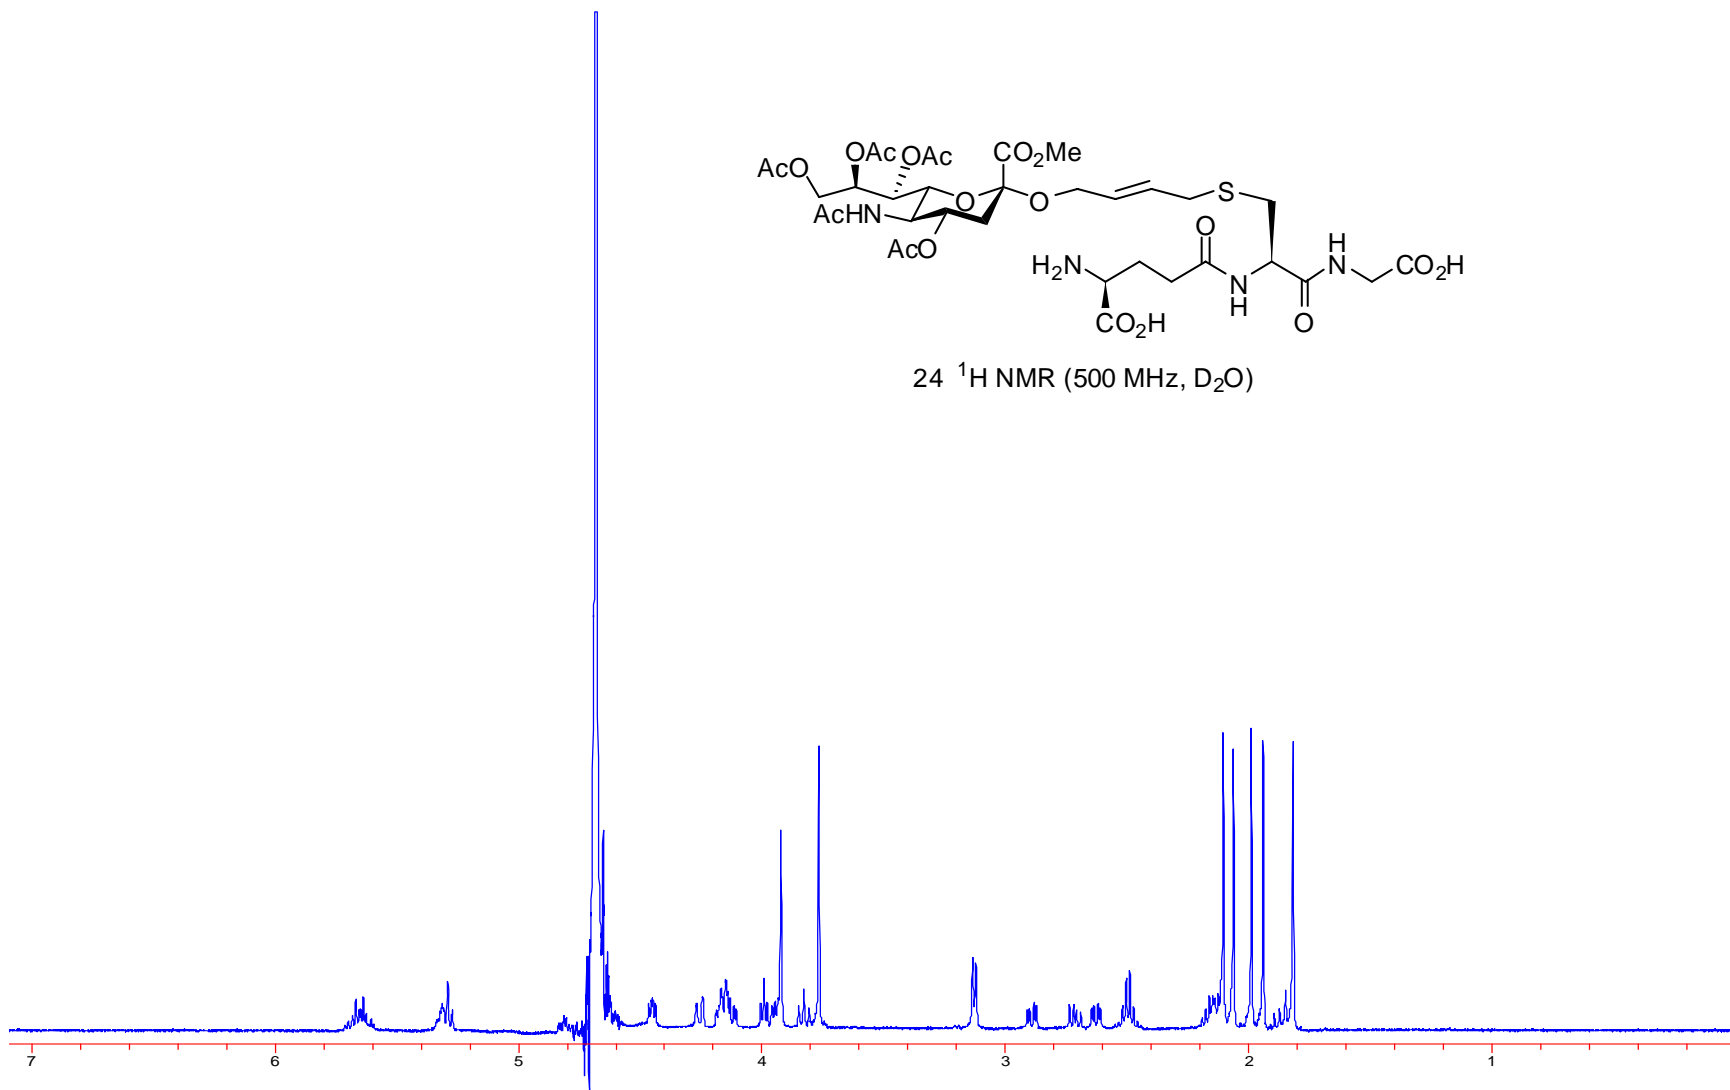

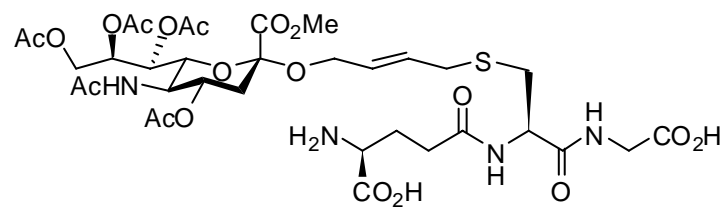

24 <sup>13</sup>C NMR (125 MHz, D<sub>2</sub>O)

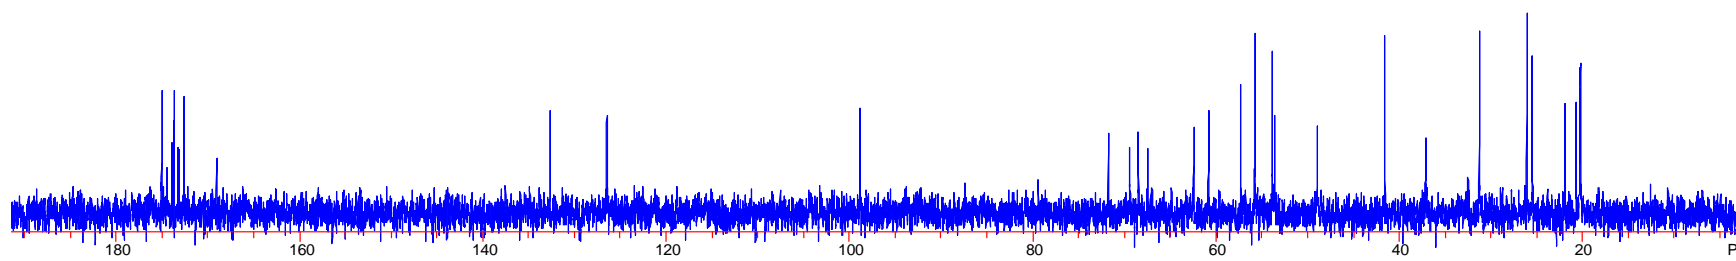

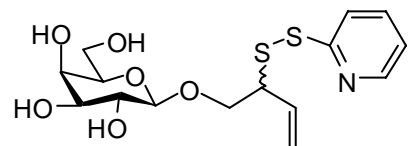

25b  $^1\text{H}$  NMR (500 MHz, MeOD)

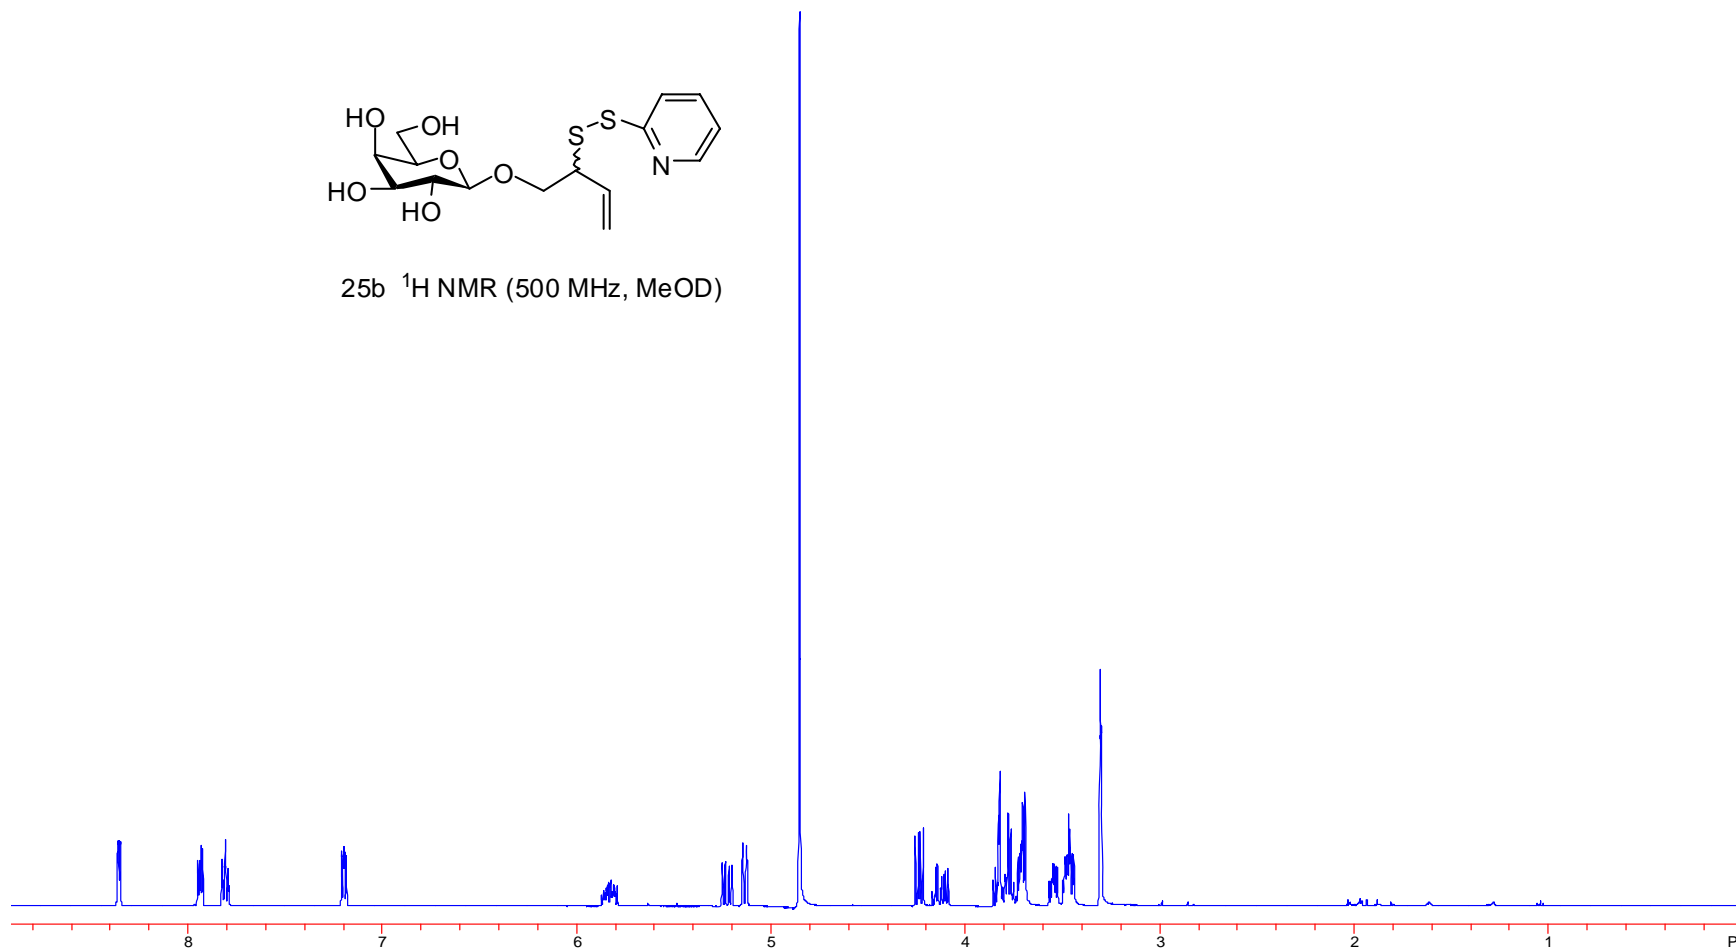

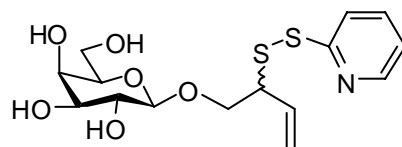

25b <sup>13</sup>C NMR (125 MHz, MeOD)

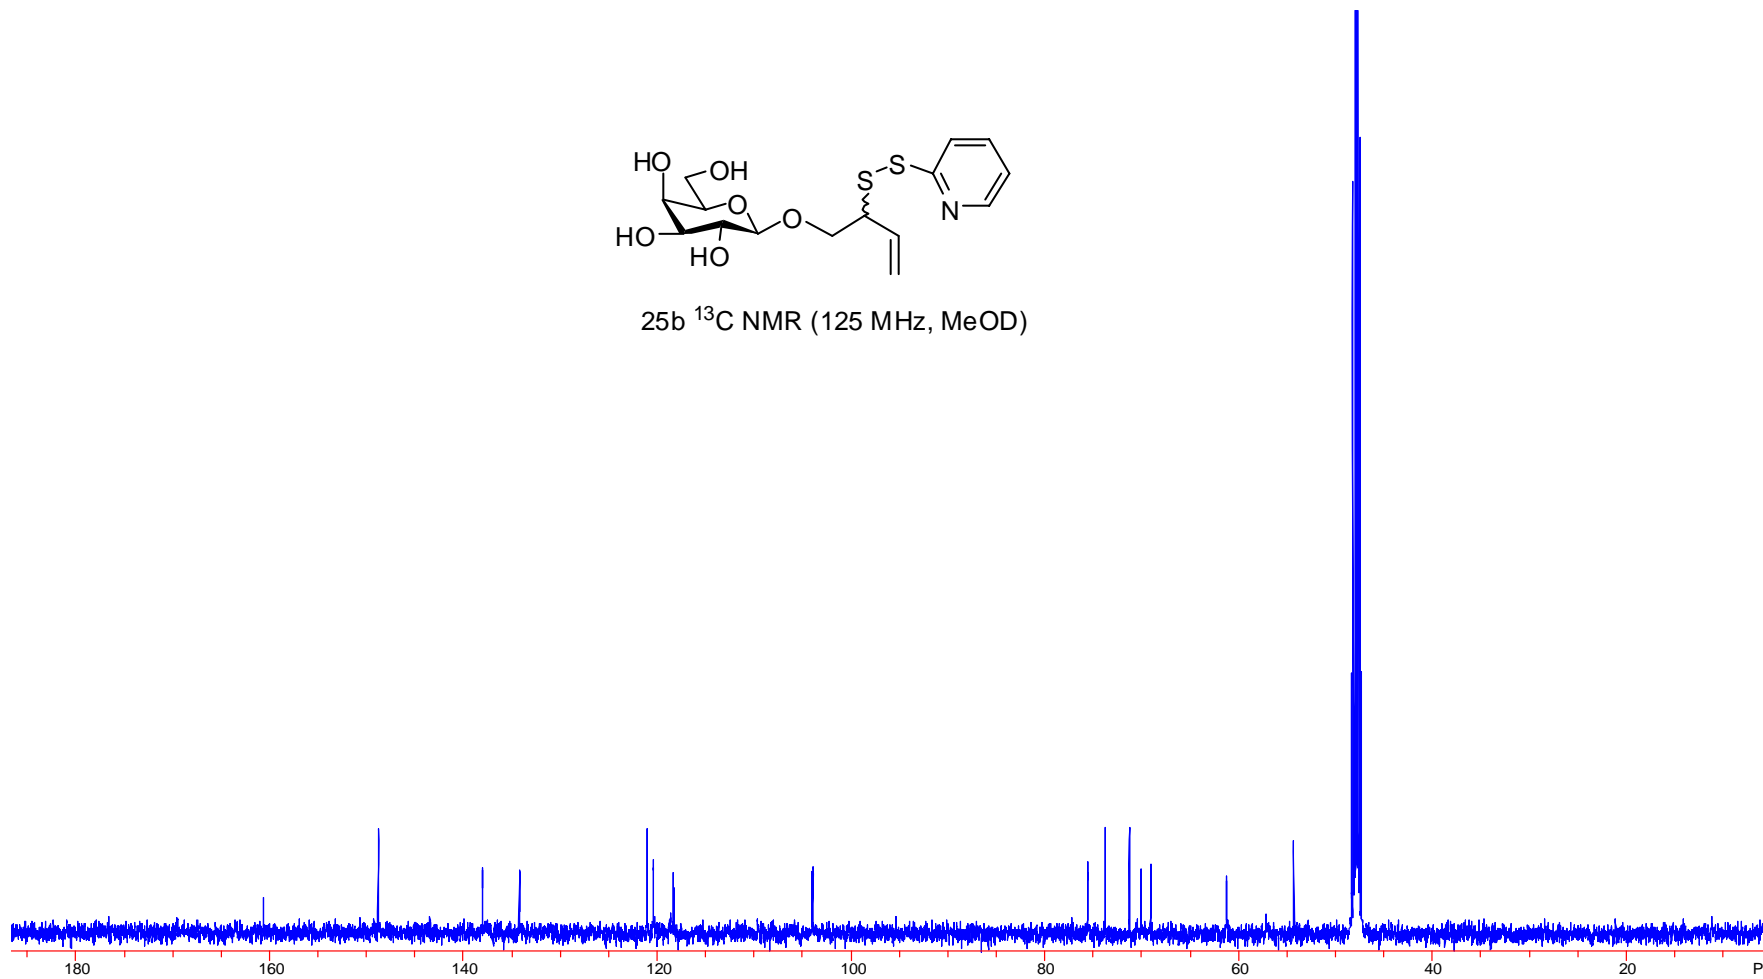

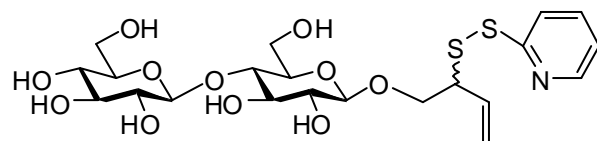

25c  $^1\text{H}$  NMR (500 MHz, MeOD)

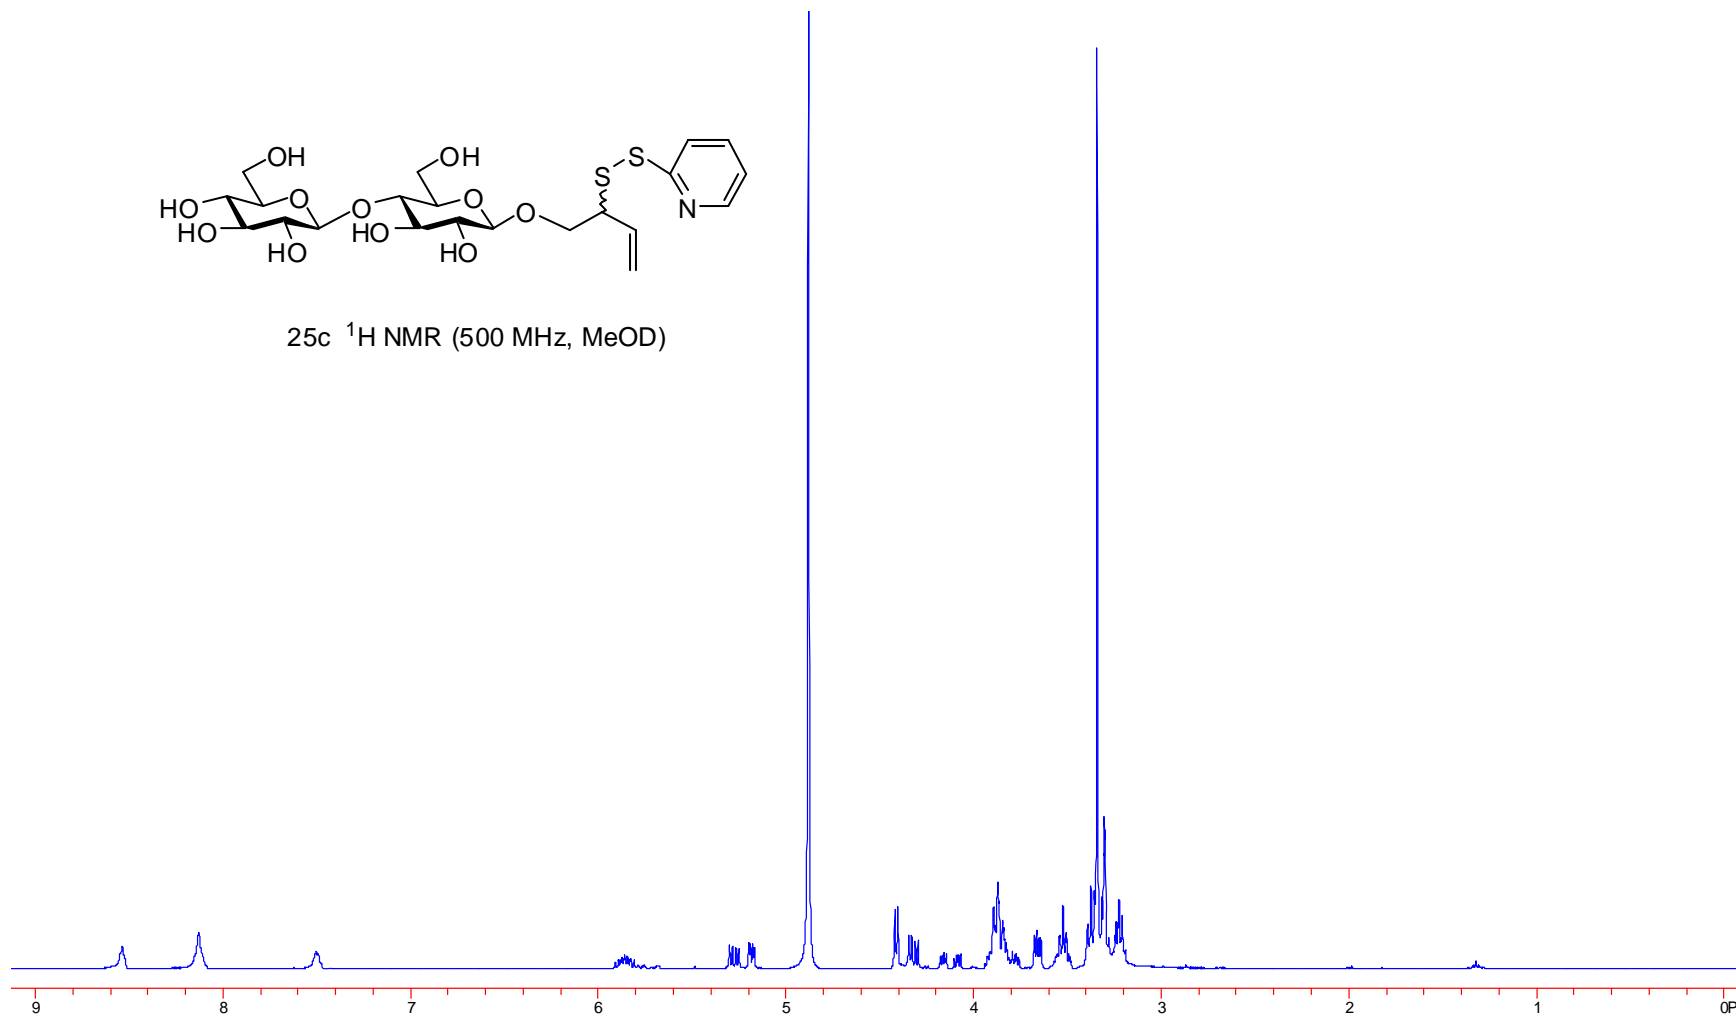

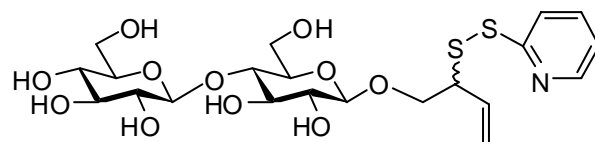

25c  $^{13}\text{C}$  NMR (125 MHz, MeOD)

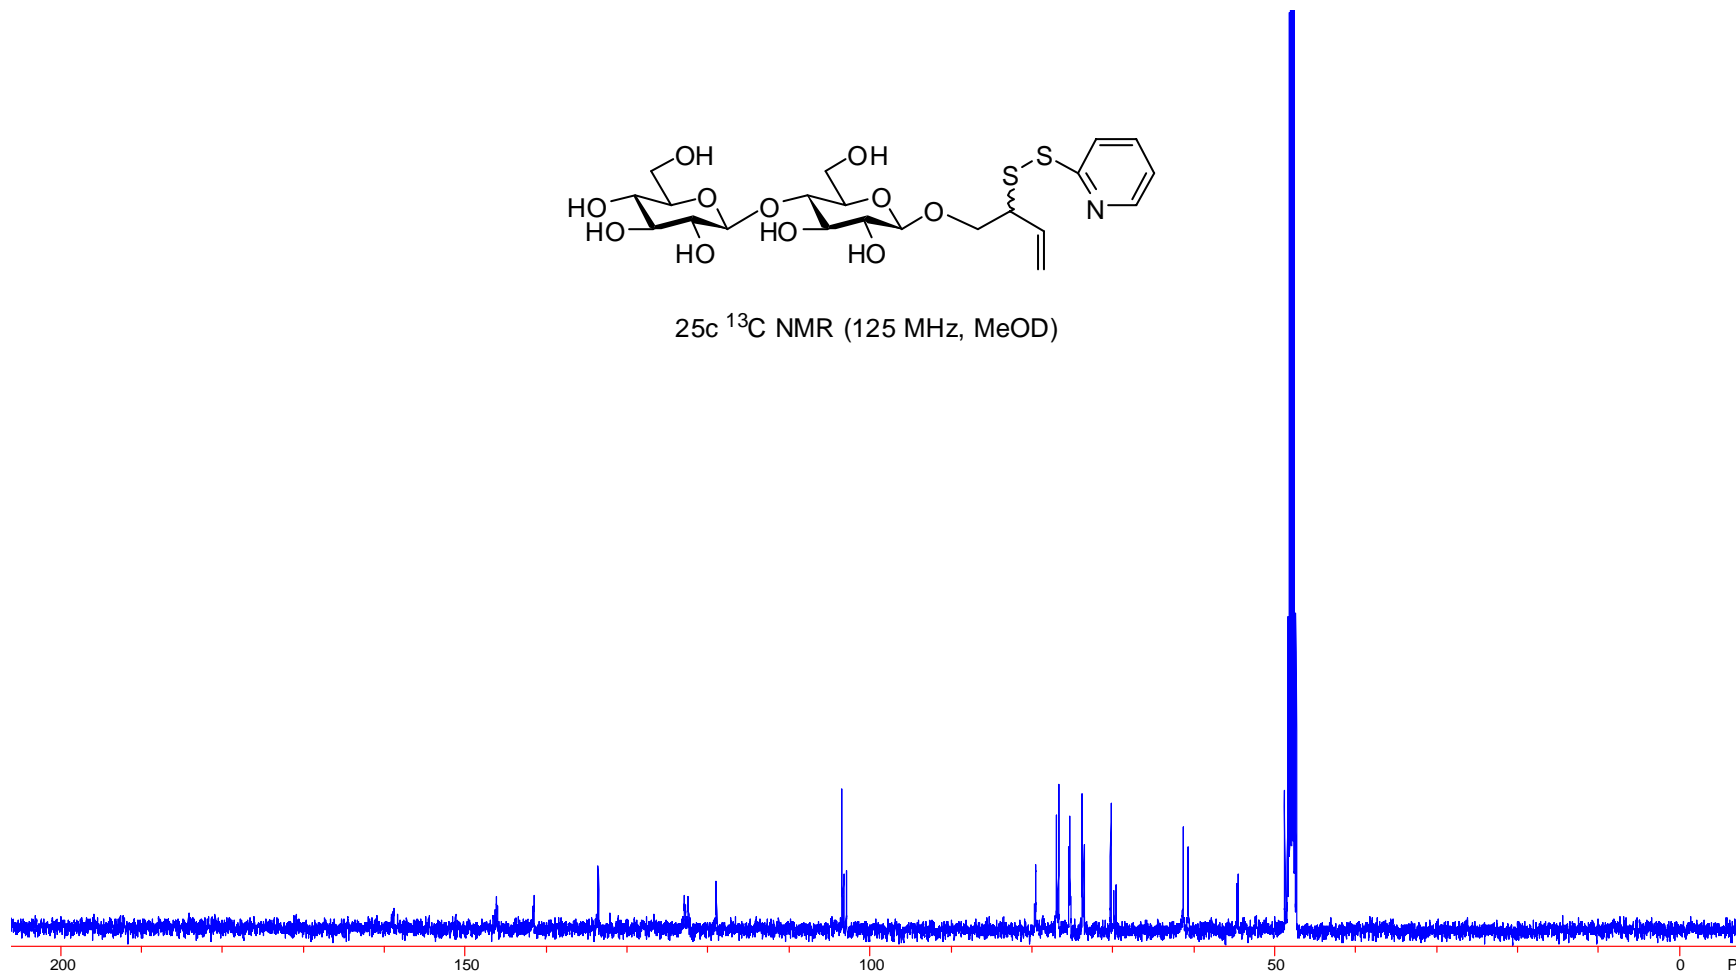

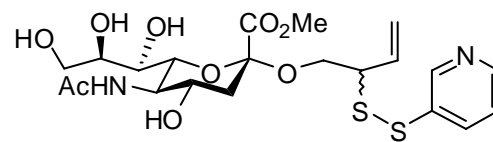

26 <sup>1</sup>H NMR (500 MHz, MeOD)

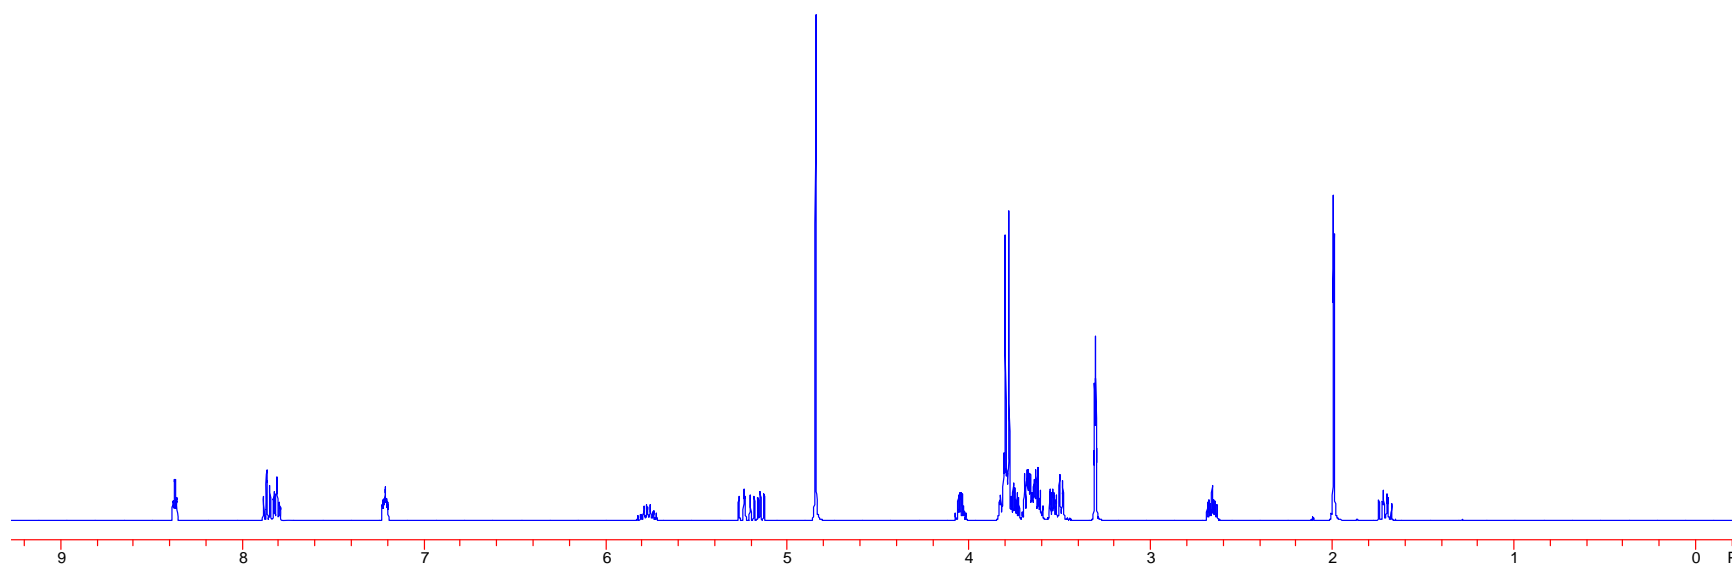

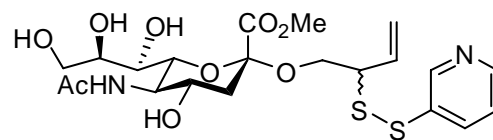

26 <sup>13</sup>C NMR (125 MHz, MeOD)

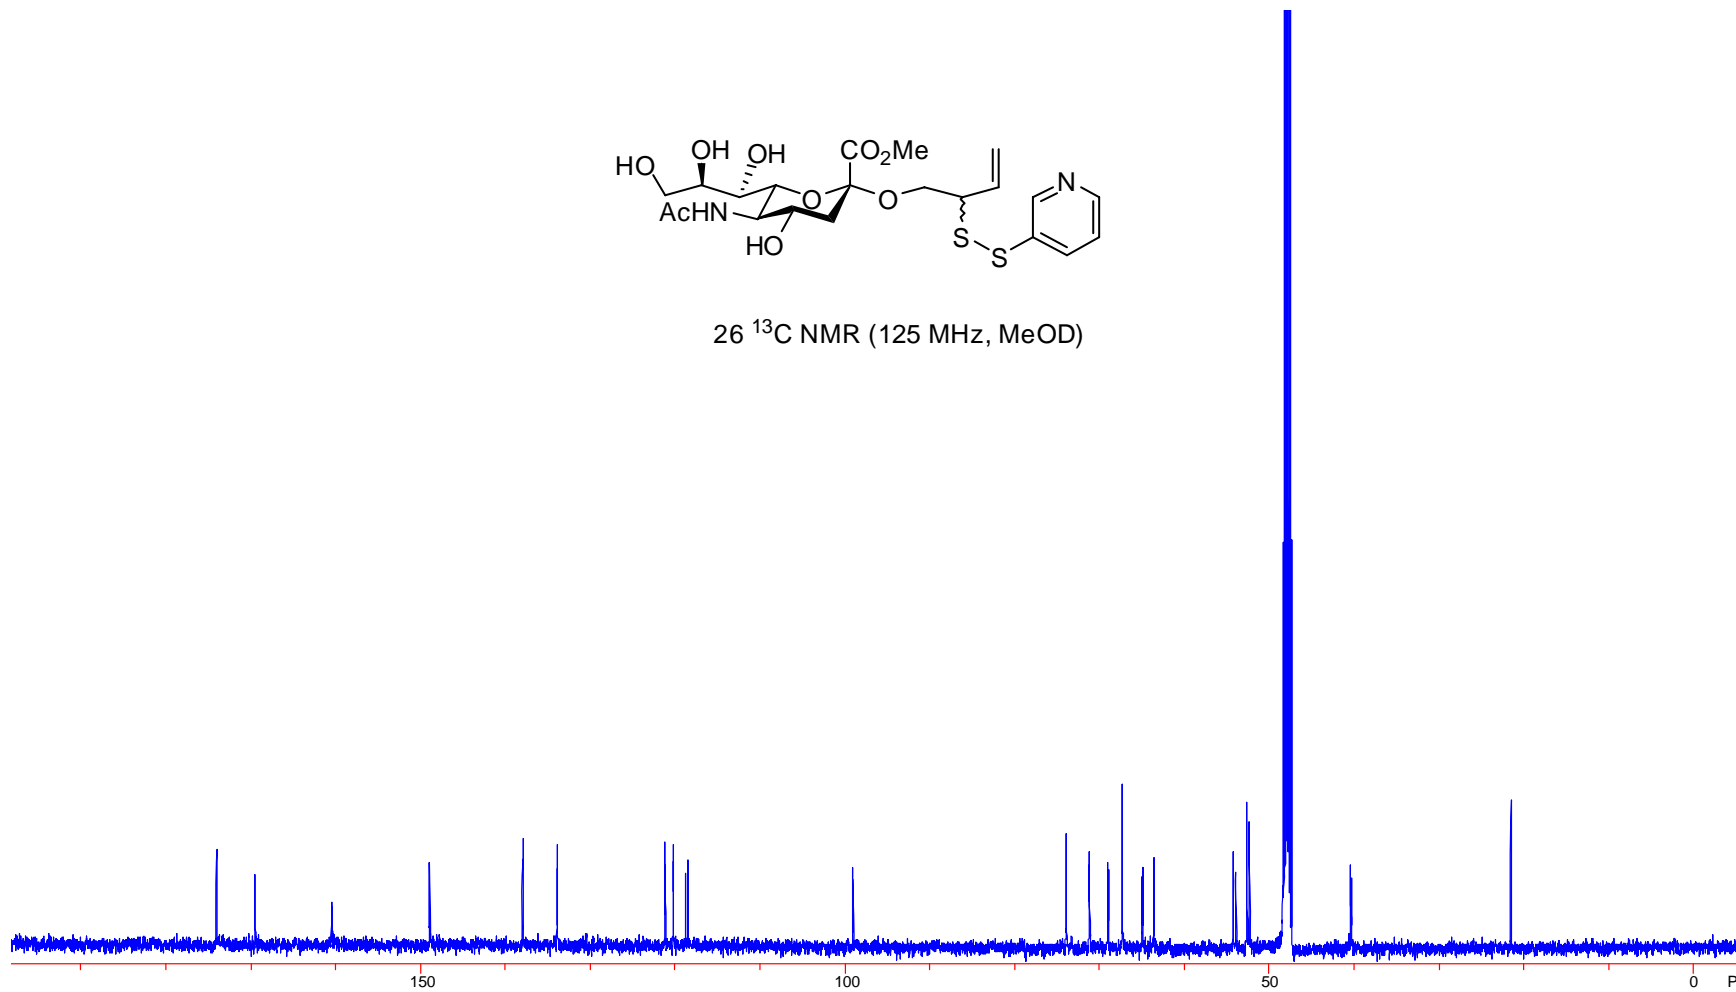



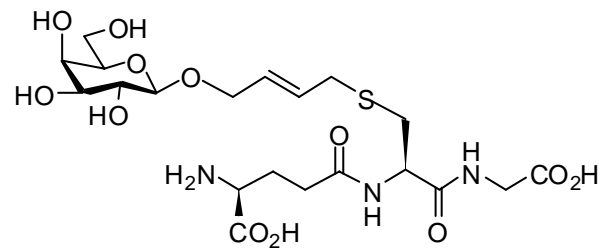

27  $^1\text{H}$  NMR (400 MHz,  $\text{D}_2\text{O}$ )

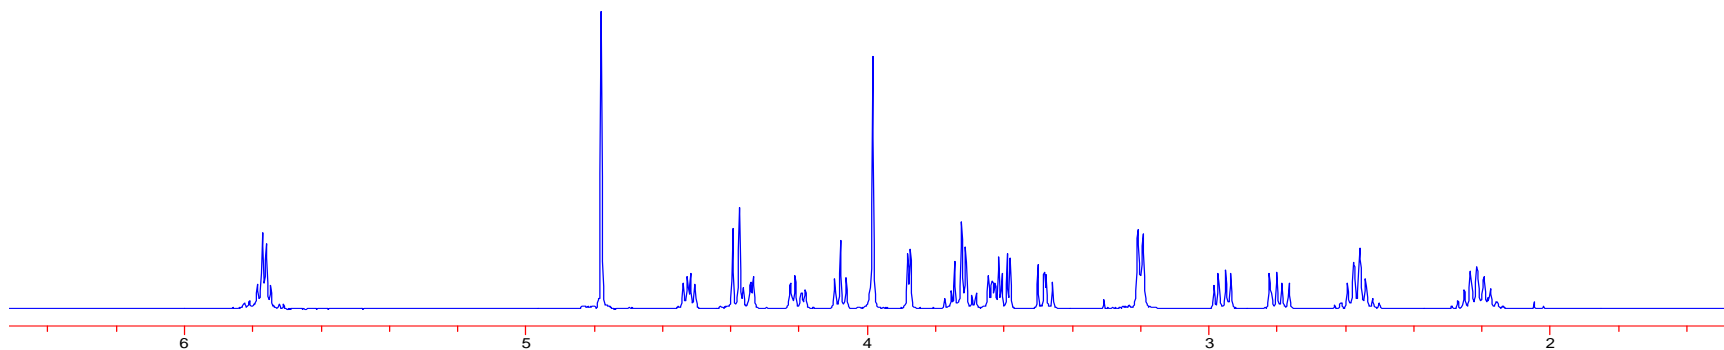

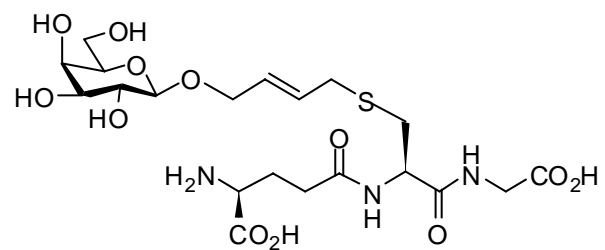

27  $^{13}\text{C}$  NMR (100 MHz, D<sub>2</sub>O)

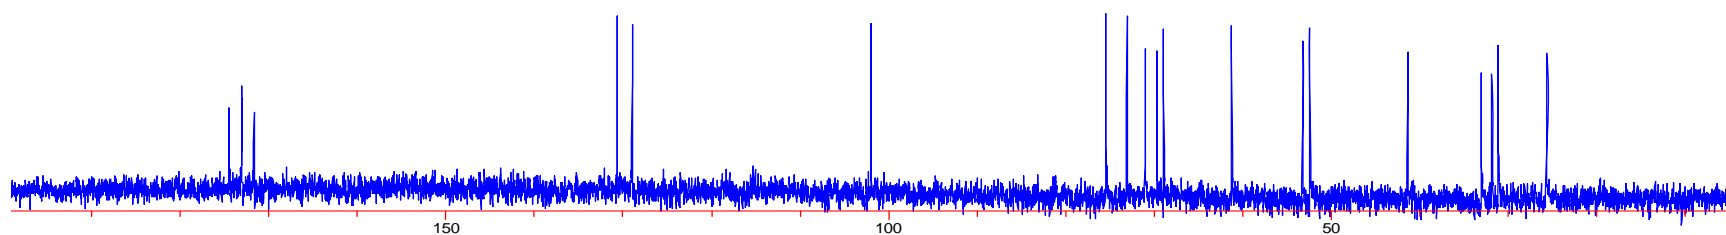

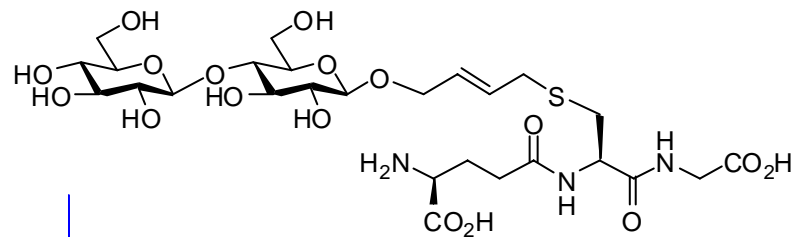

28 <sup>1</sup>H NMR (400 MHz, MeOD)

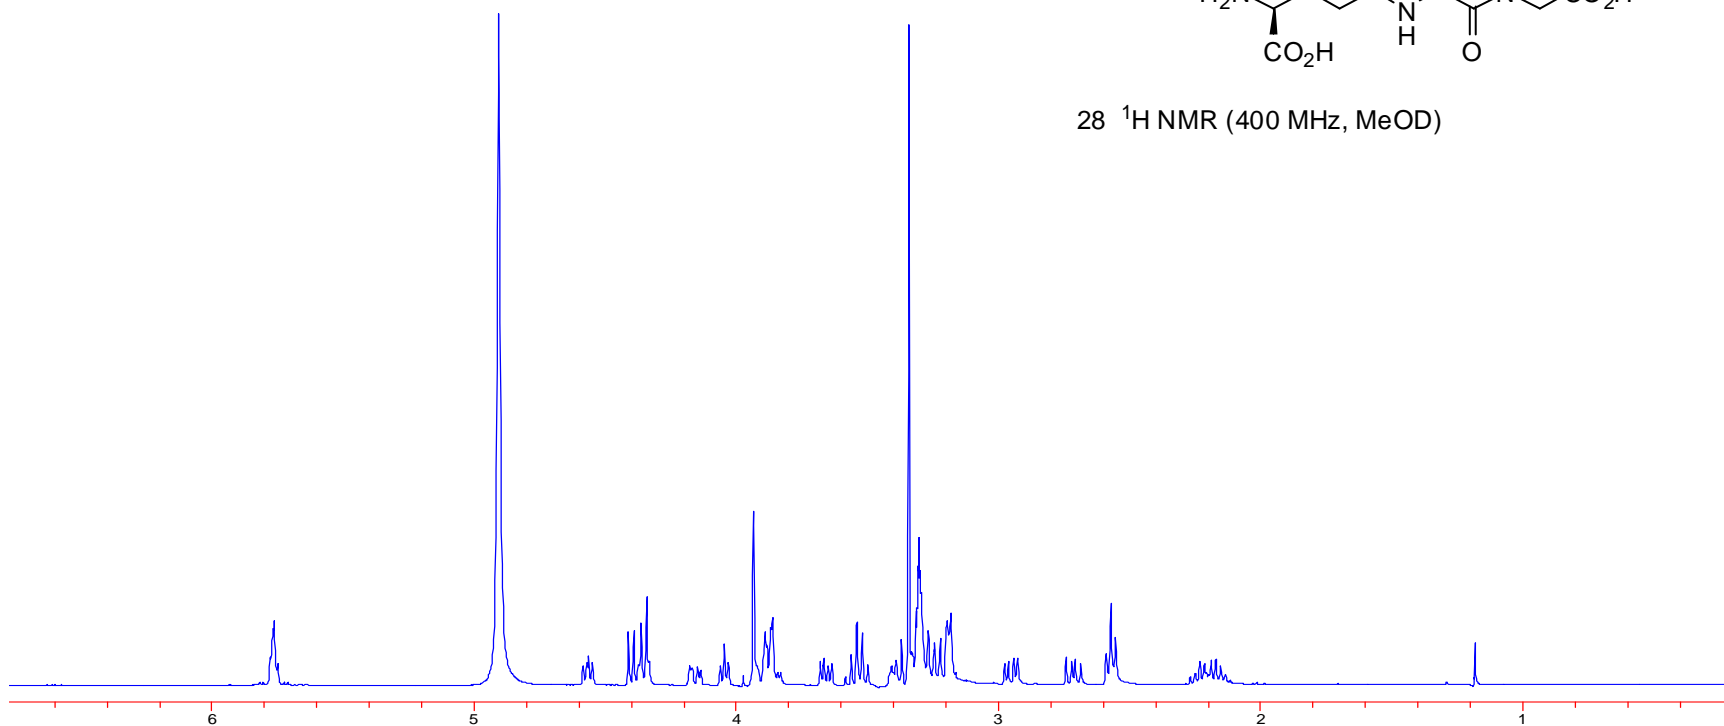

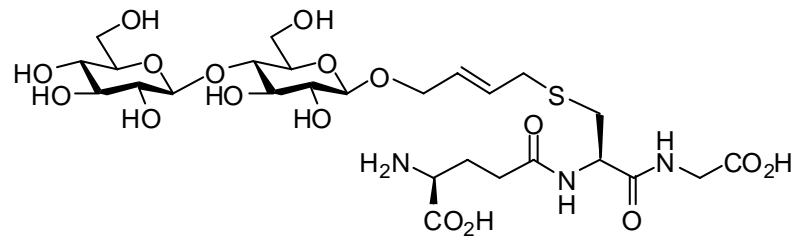

28 <sup>13</sup>C NMR (100 MHz, MeOD)

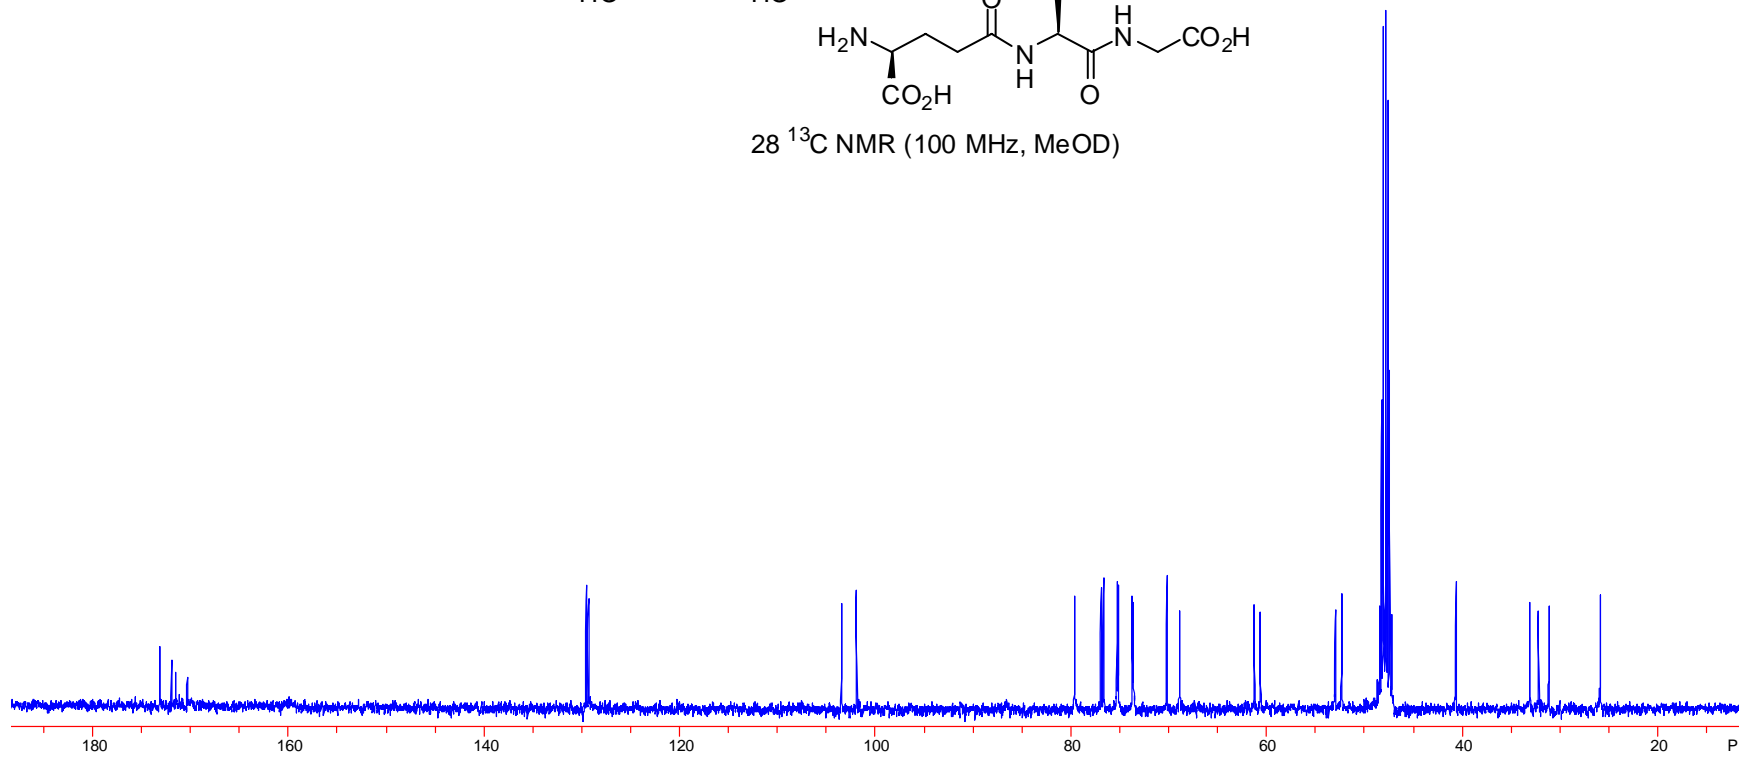

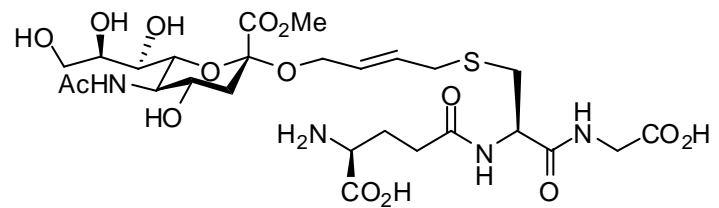

29 <sup>1</sup>H NMR (500 MHz, D<sub>2</sub>O)

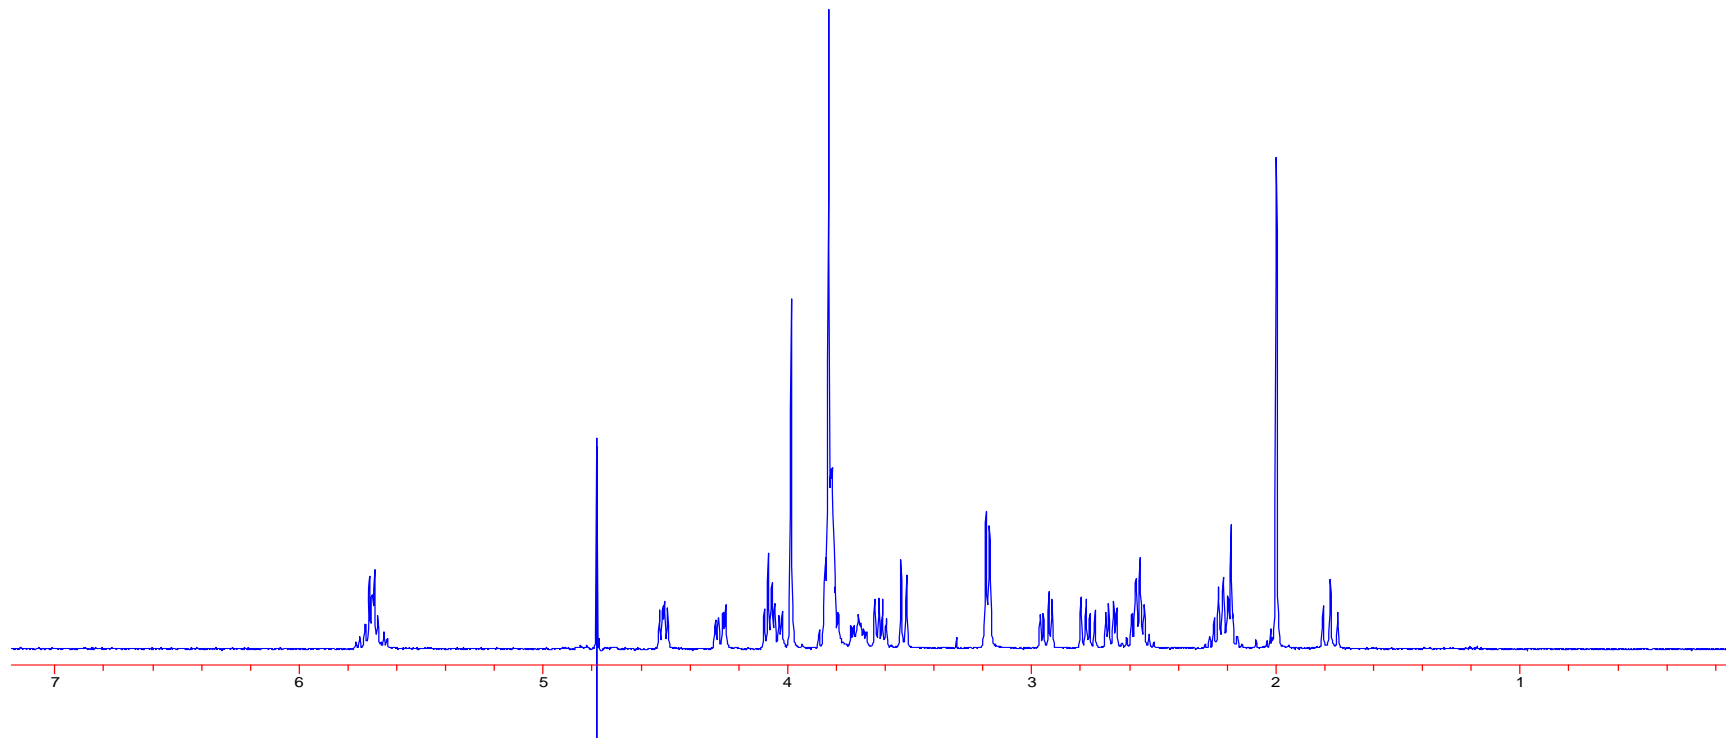

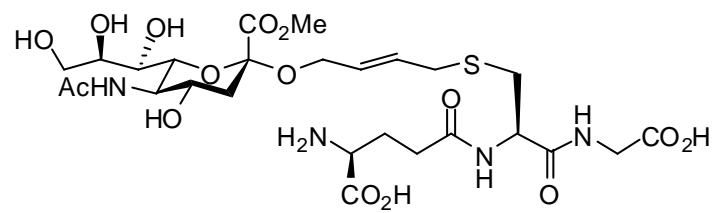

29 <sup>13</sup>C NMR (125 MHz, D<sub>2</sub>O)

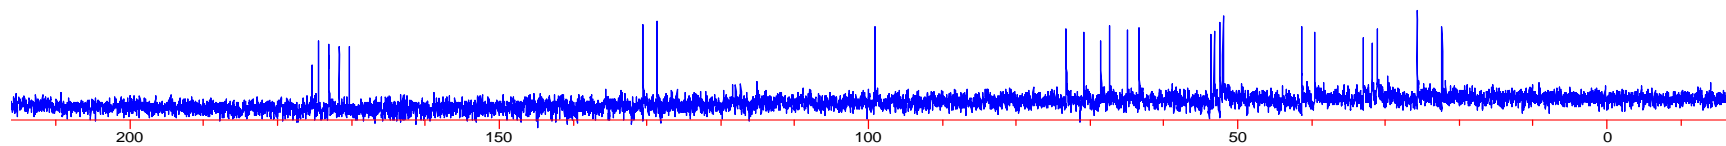

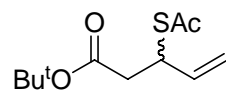

32 <sup>1</sup>H NMR (500 MHz, CDCl<sub>3</sub>)

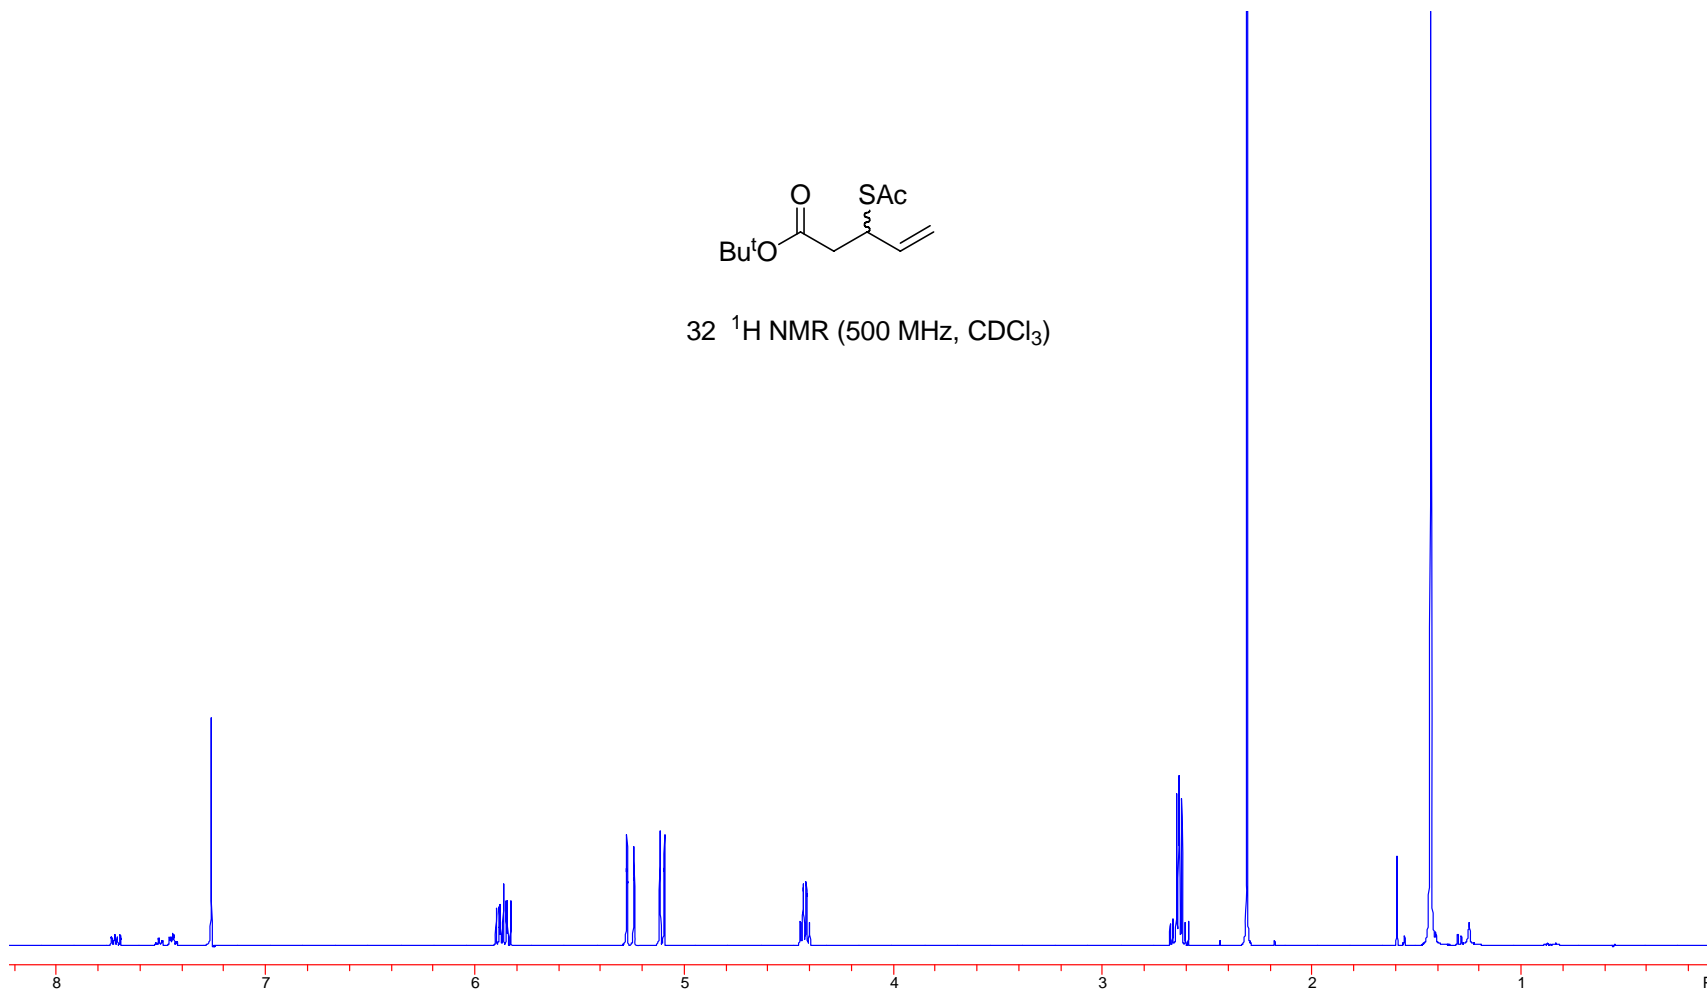

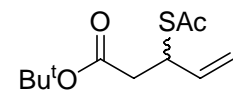

32  $^{13}\text{C}$  NMR (125 MHz,  $\text{CDCl}_3$ )

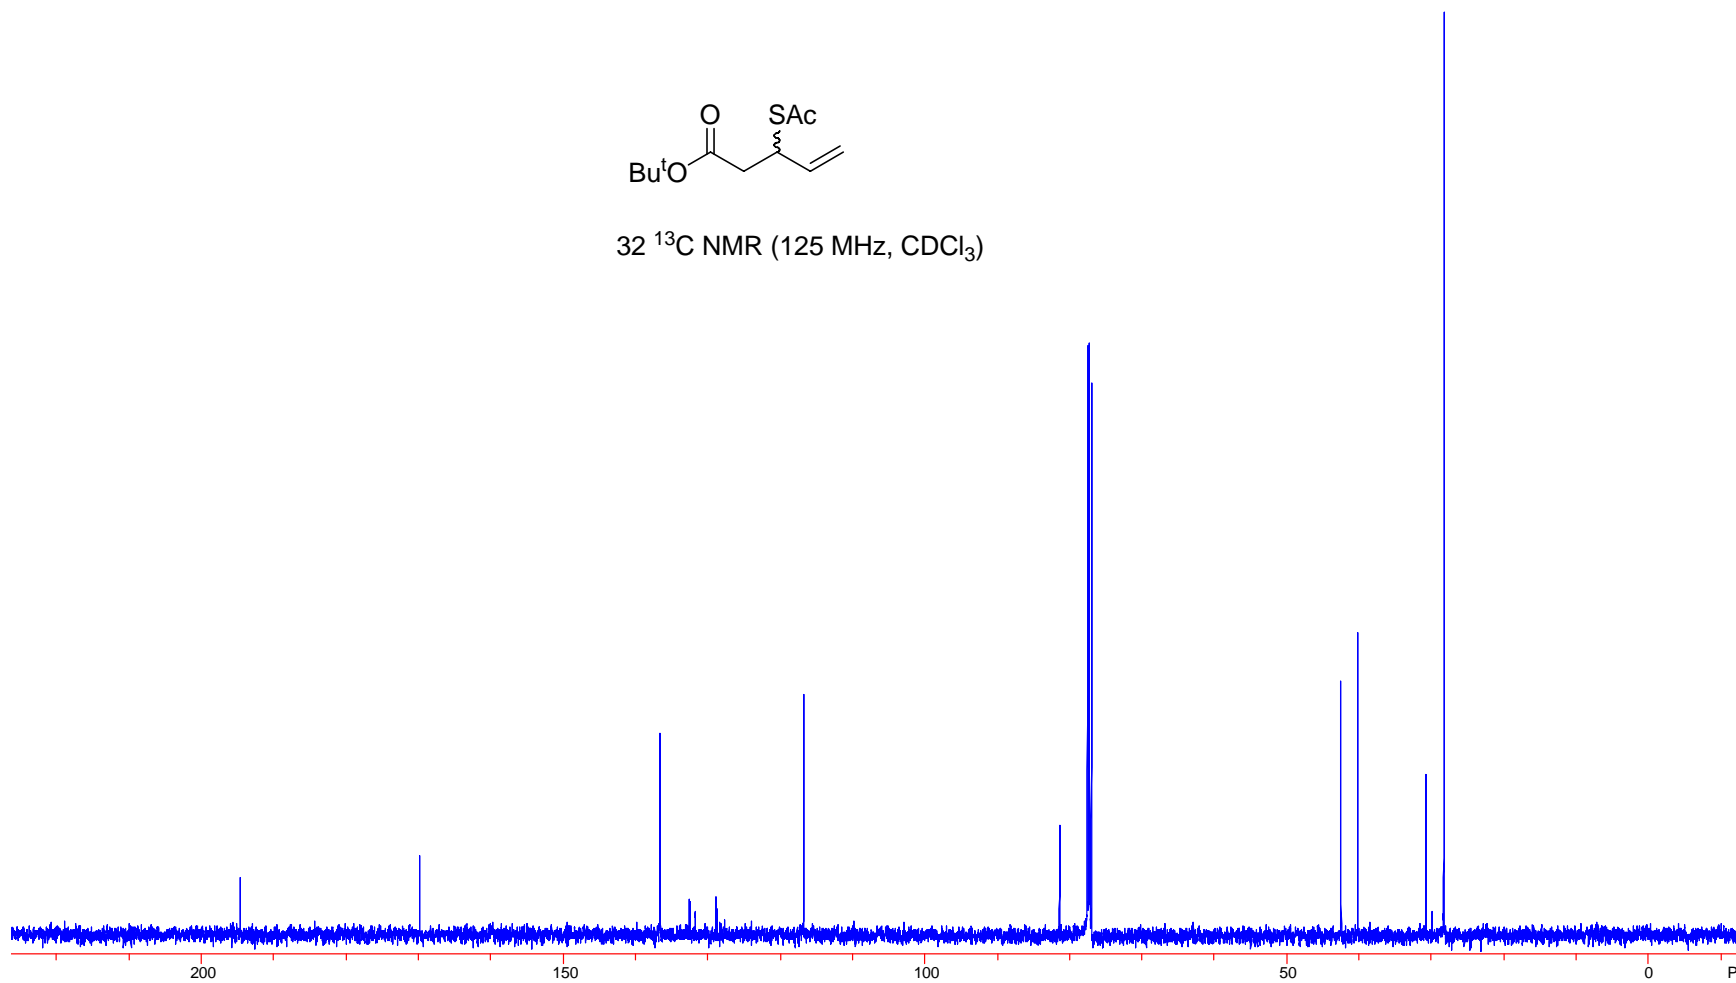



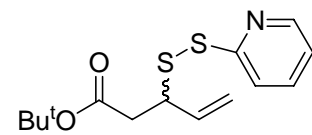

33  $^1\text{H}$  NMR (500 MHz,  $\text{CDCl}_3$ )

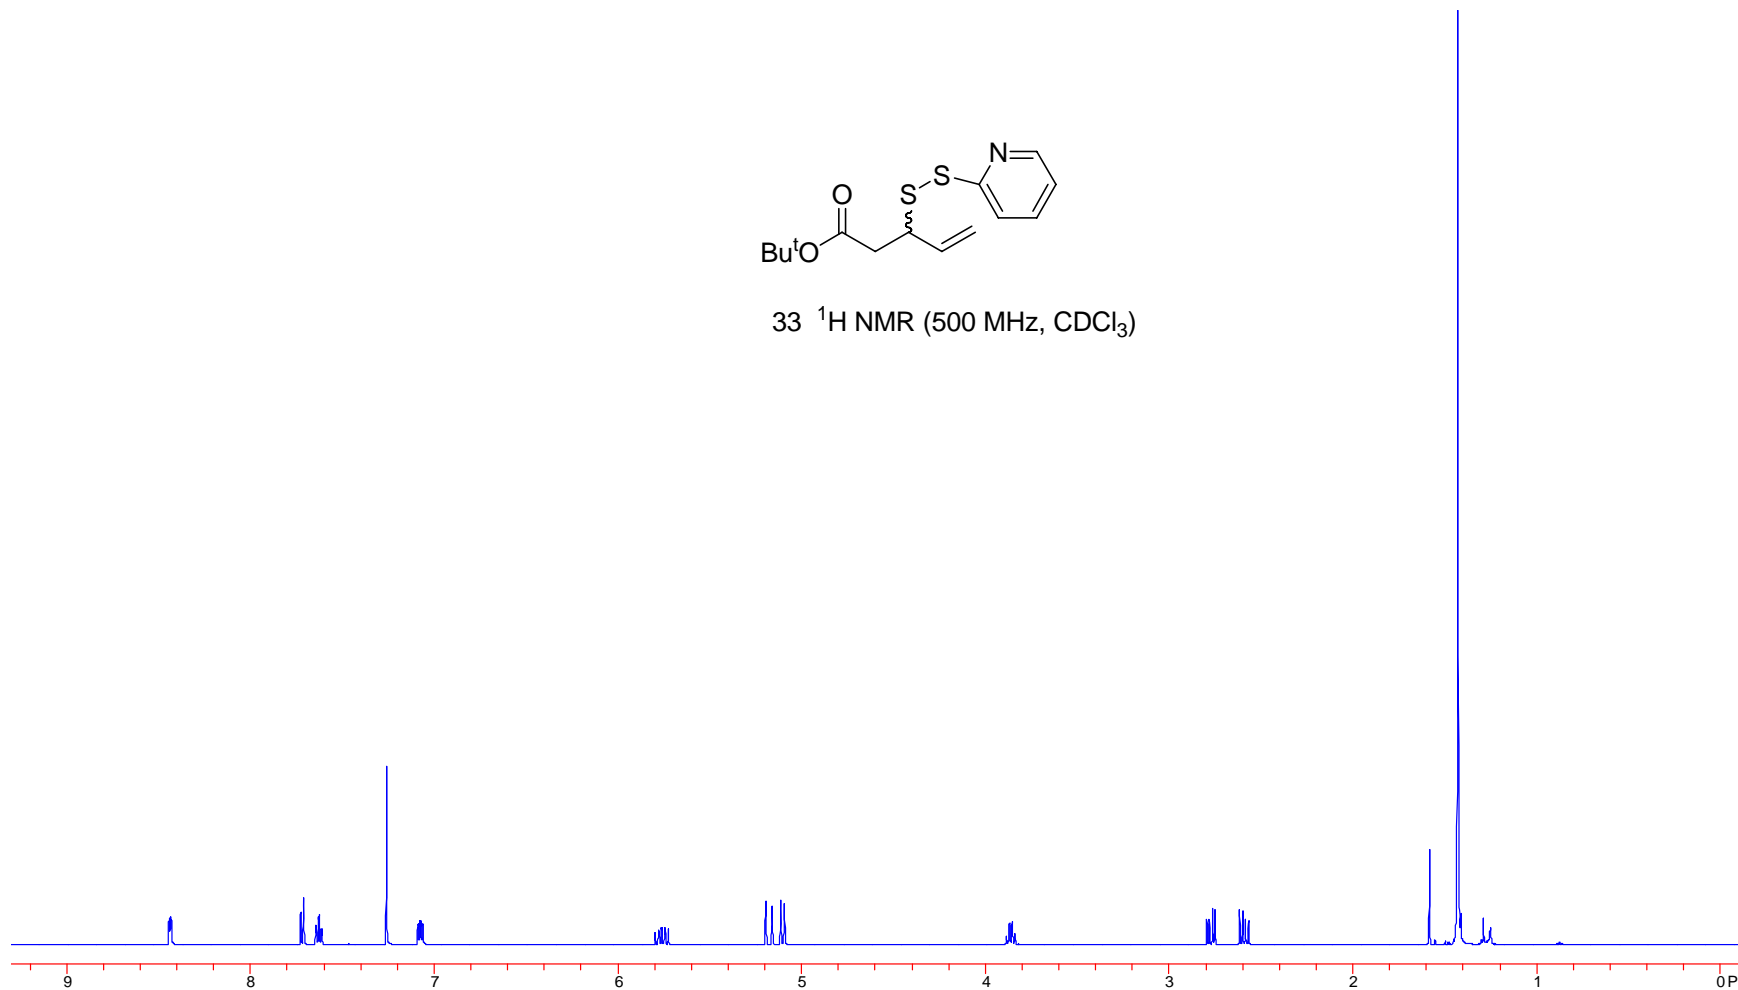

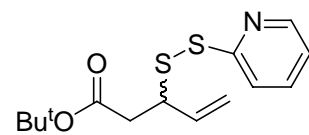

33  $^{13}\text{C}$  NMR (125 MHz,  $\text{CDCl}_3$ )

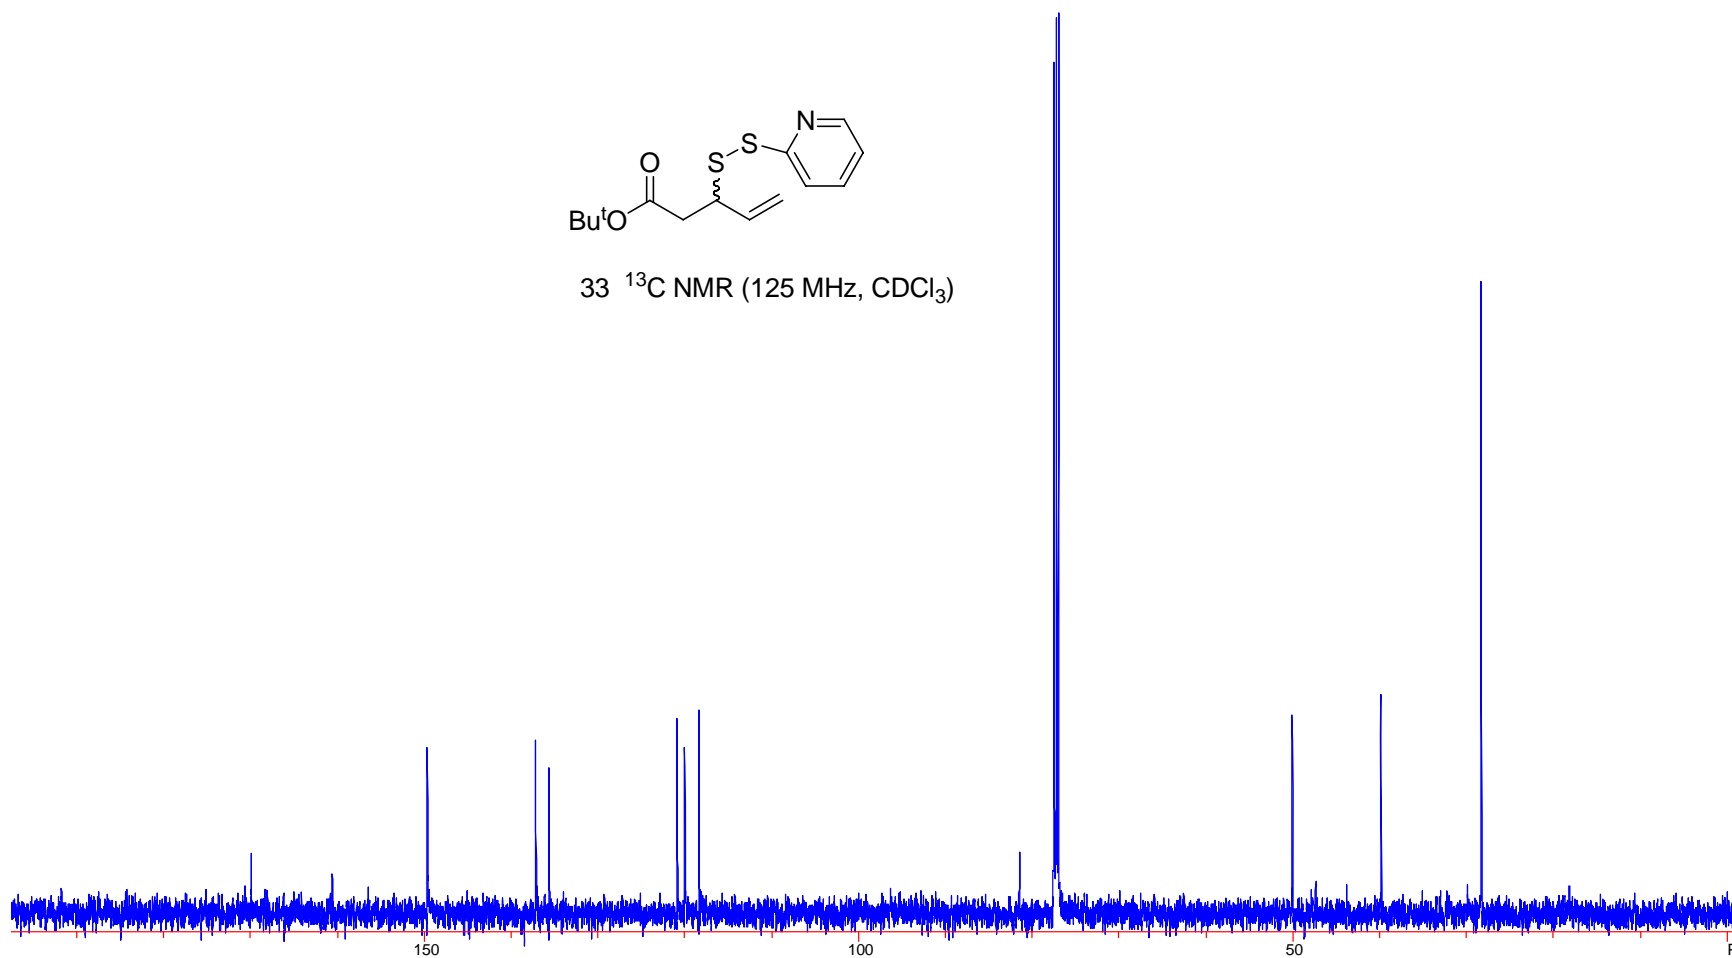

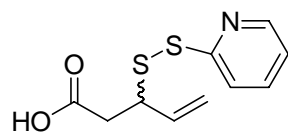

34  $^1\text{H}$  NMR (400 MHz,  $\text{CDCl}_3$ )

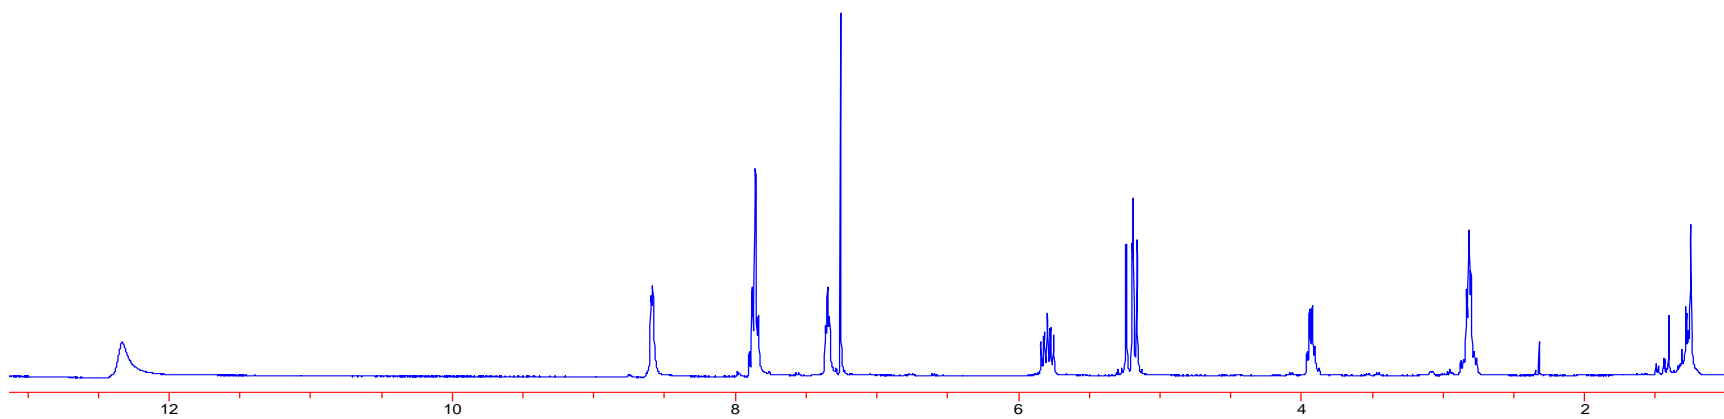

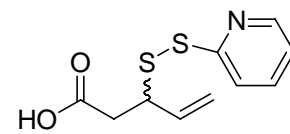

34  $^{13}\text{C}$  NMR (100 MHz,  $\text{CDCl}_3$ )

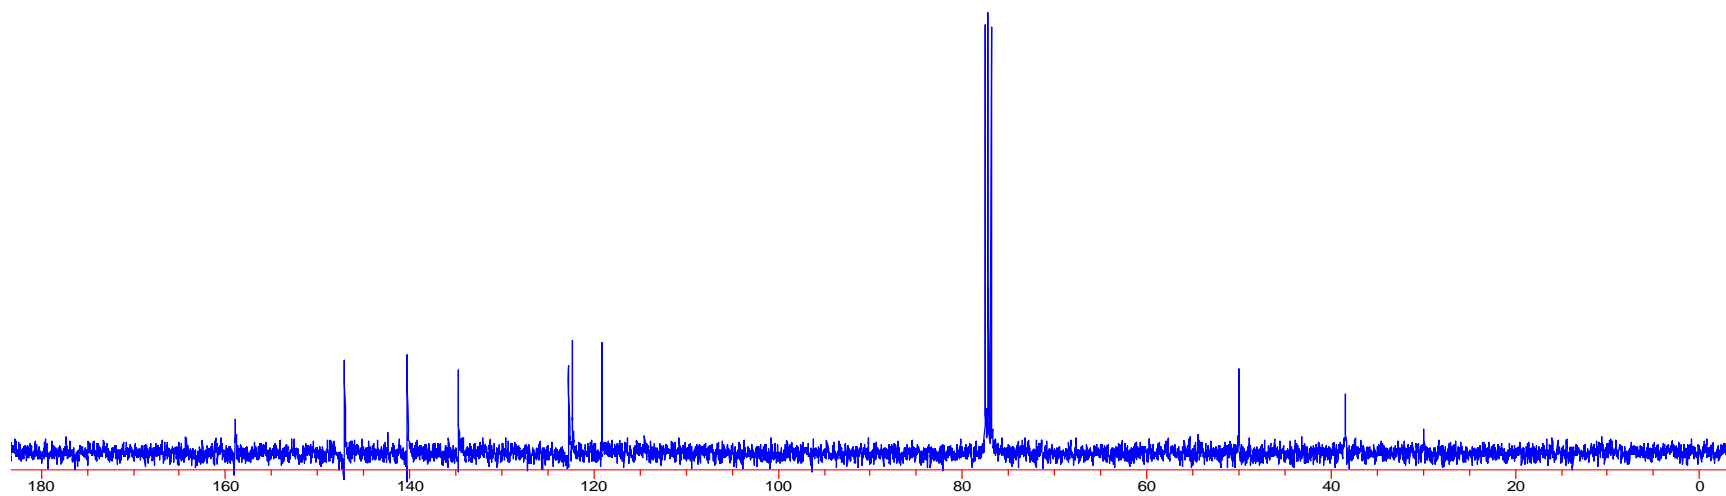

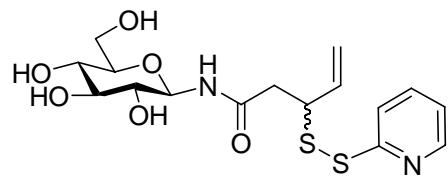

36a  $^1\text{H}$  NMR (400 MHz,  $\text{D}_2\text{O}$ )

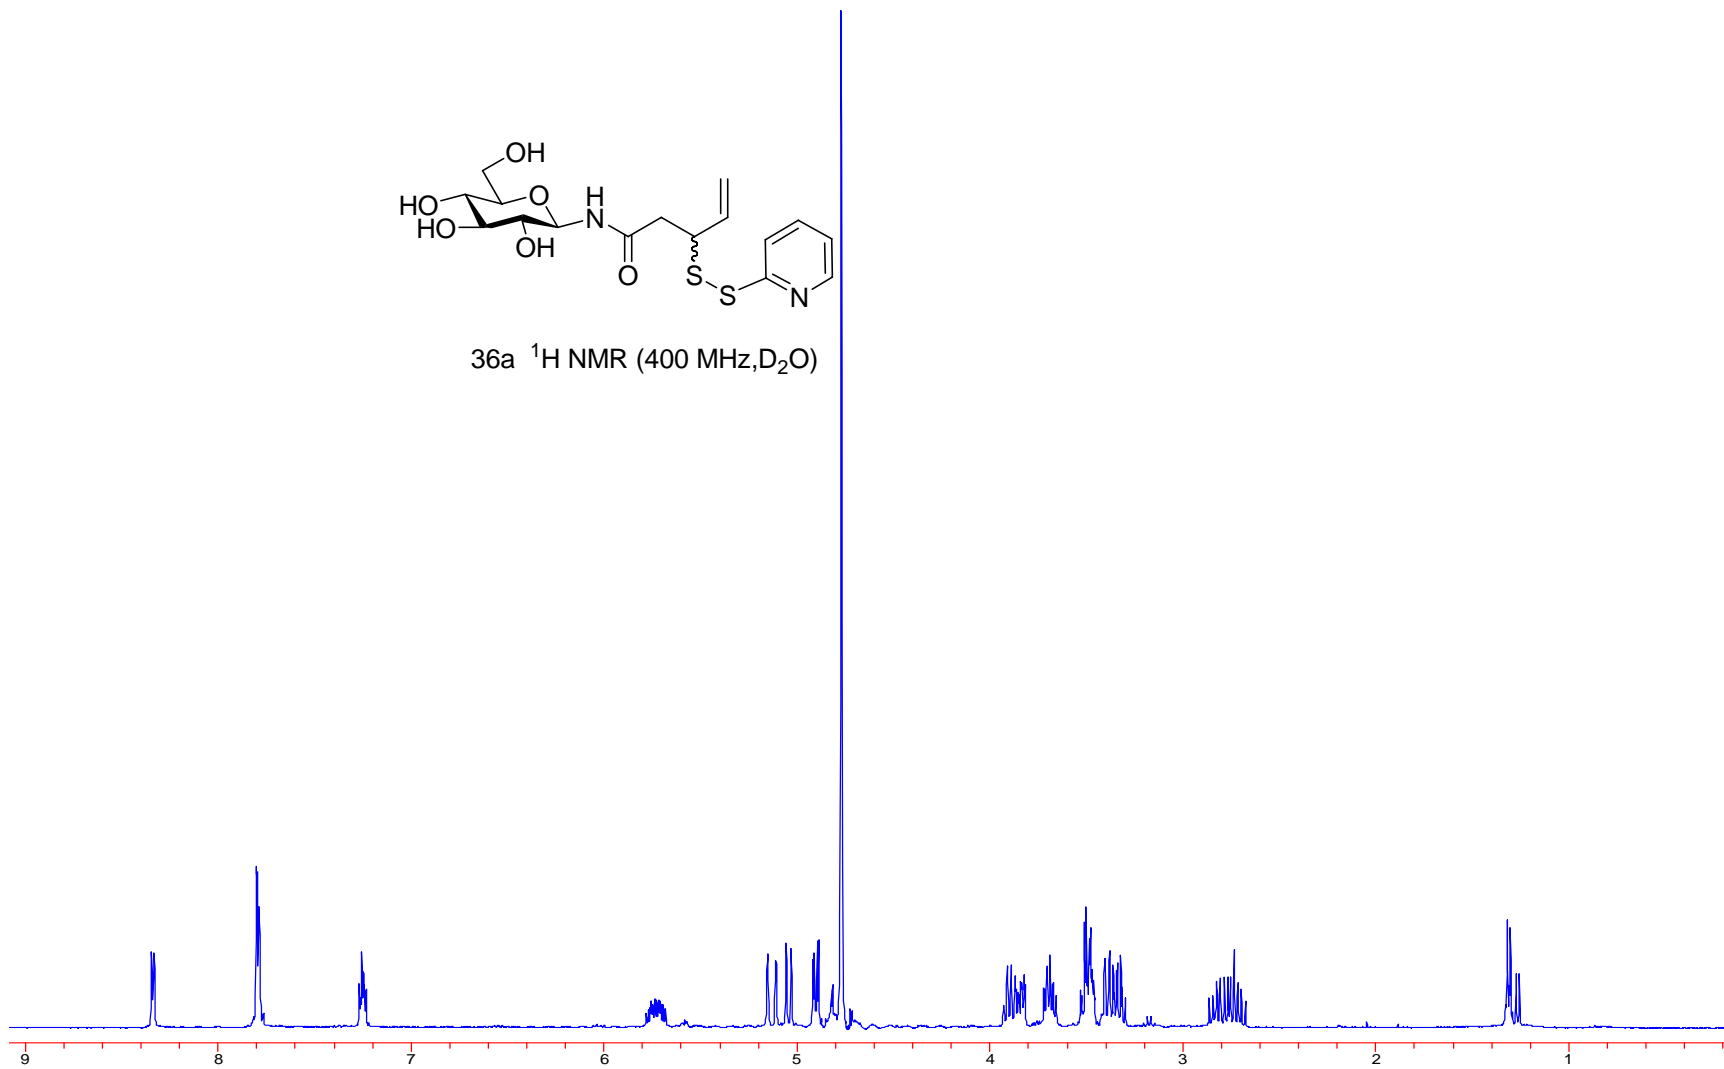

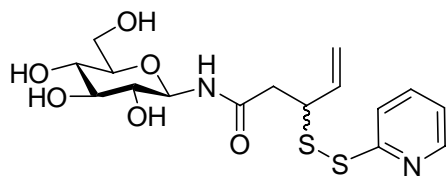

36a  $^{13}\text{C}$  NMR (100 MHz,  $\text{D}_2\text{O}$ )

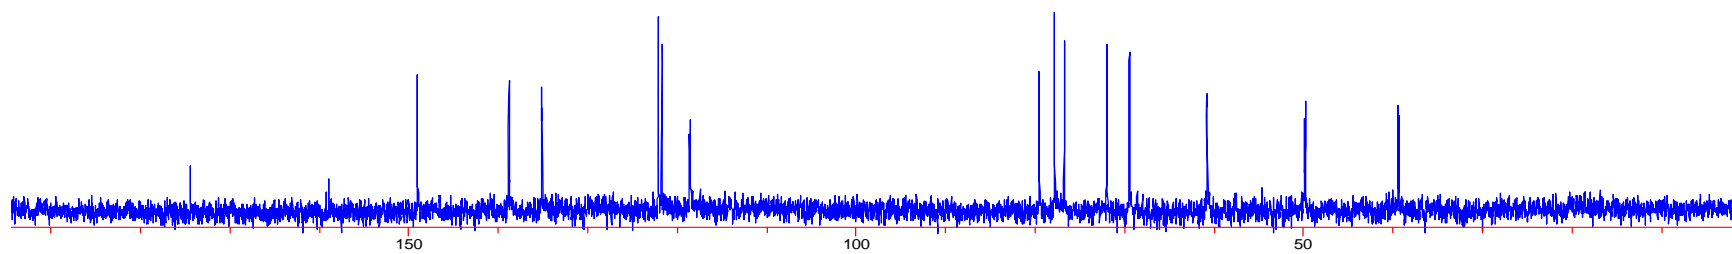

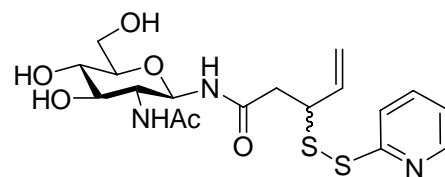

36b <sup>1</sup>H NMR (400 MHz, D<sub>2</sub>O)

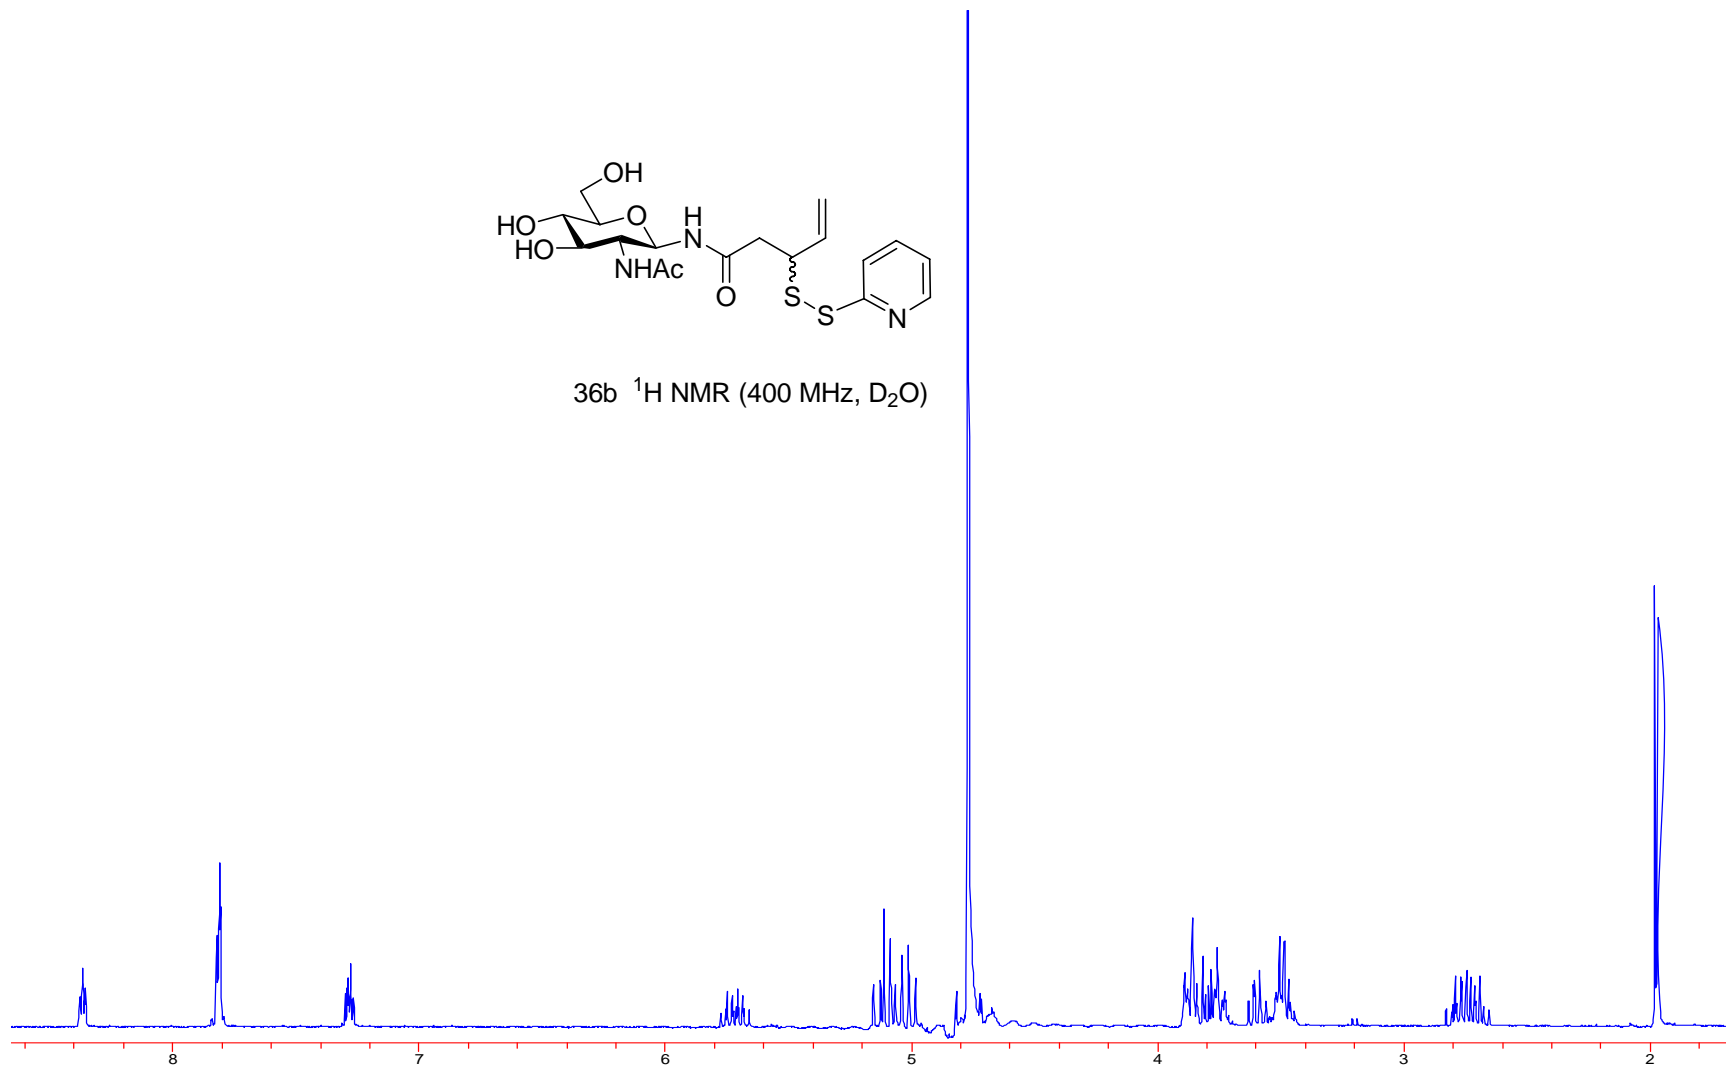

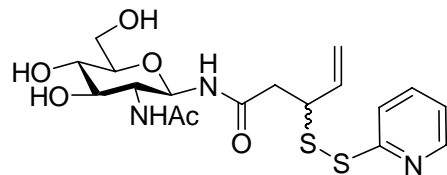

36b  $^{13}\text{C}$  NMR (100 MHz, MeOD)

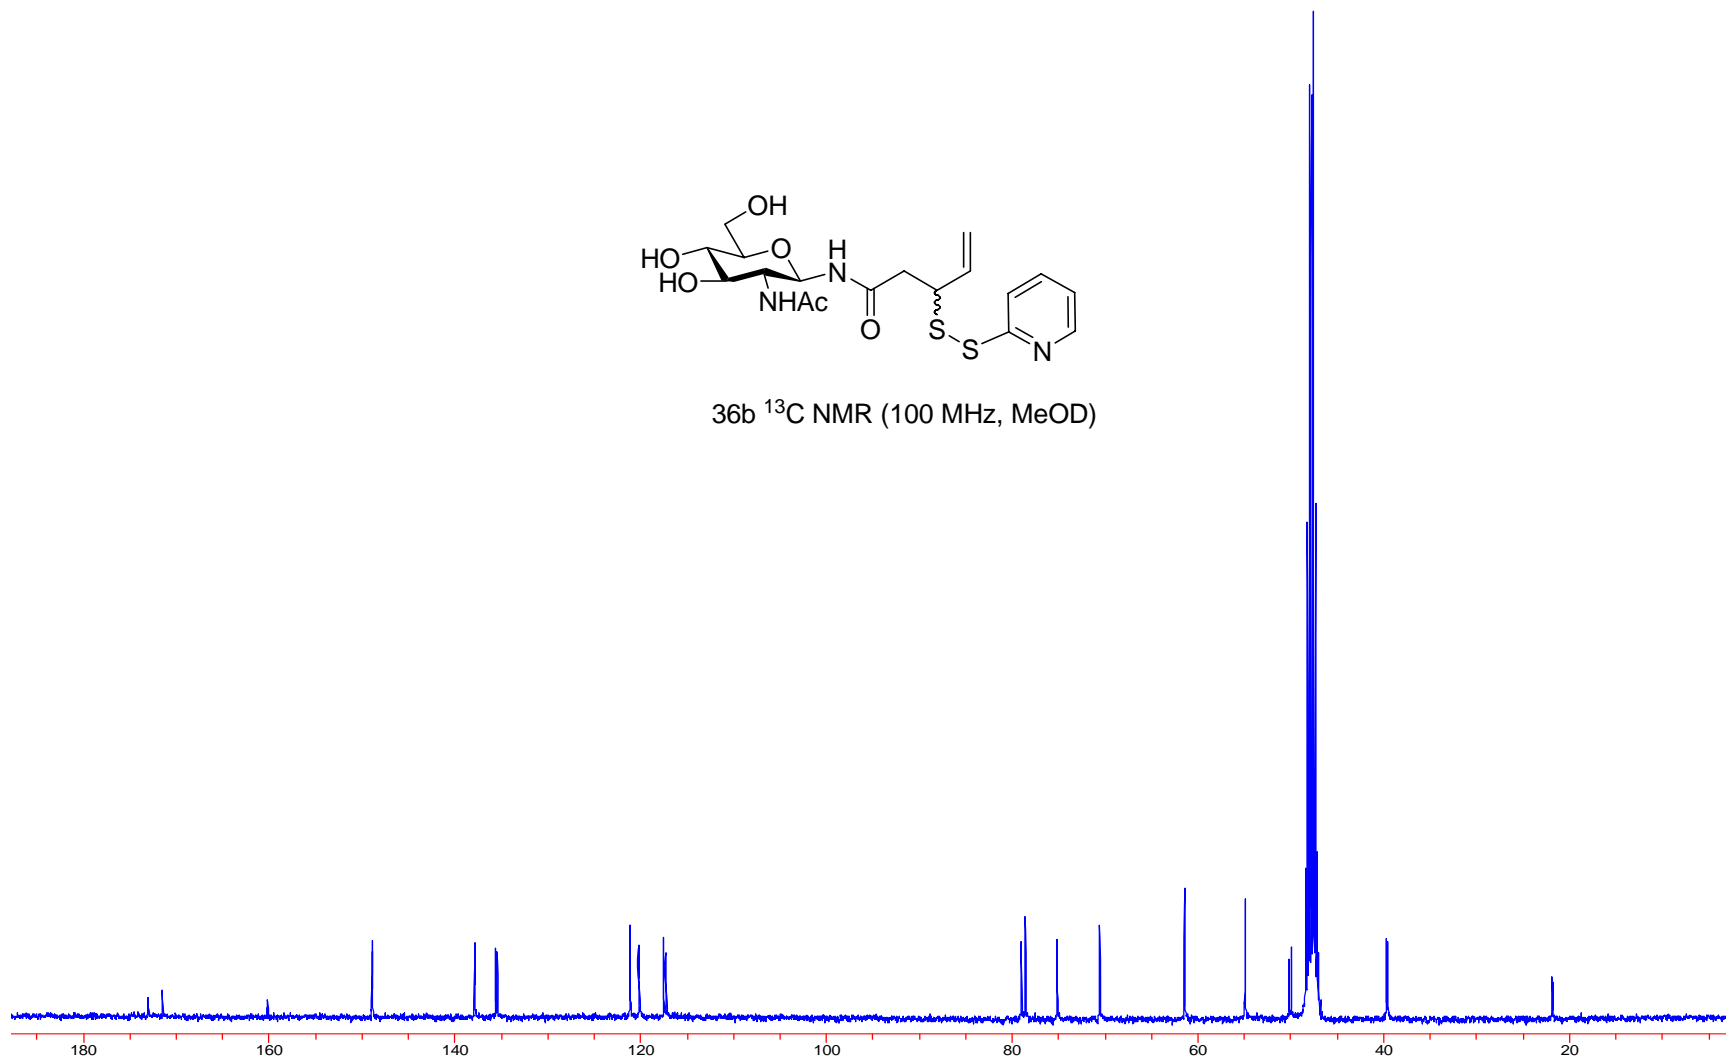



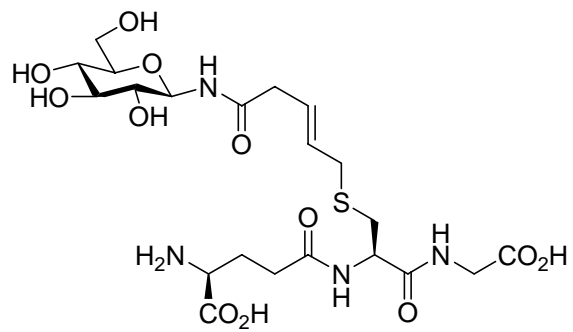

37  $^1\text{H}$  NMR (400 MHz,  $\text{D}_2\text{O}$ )

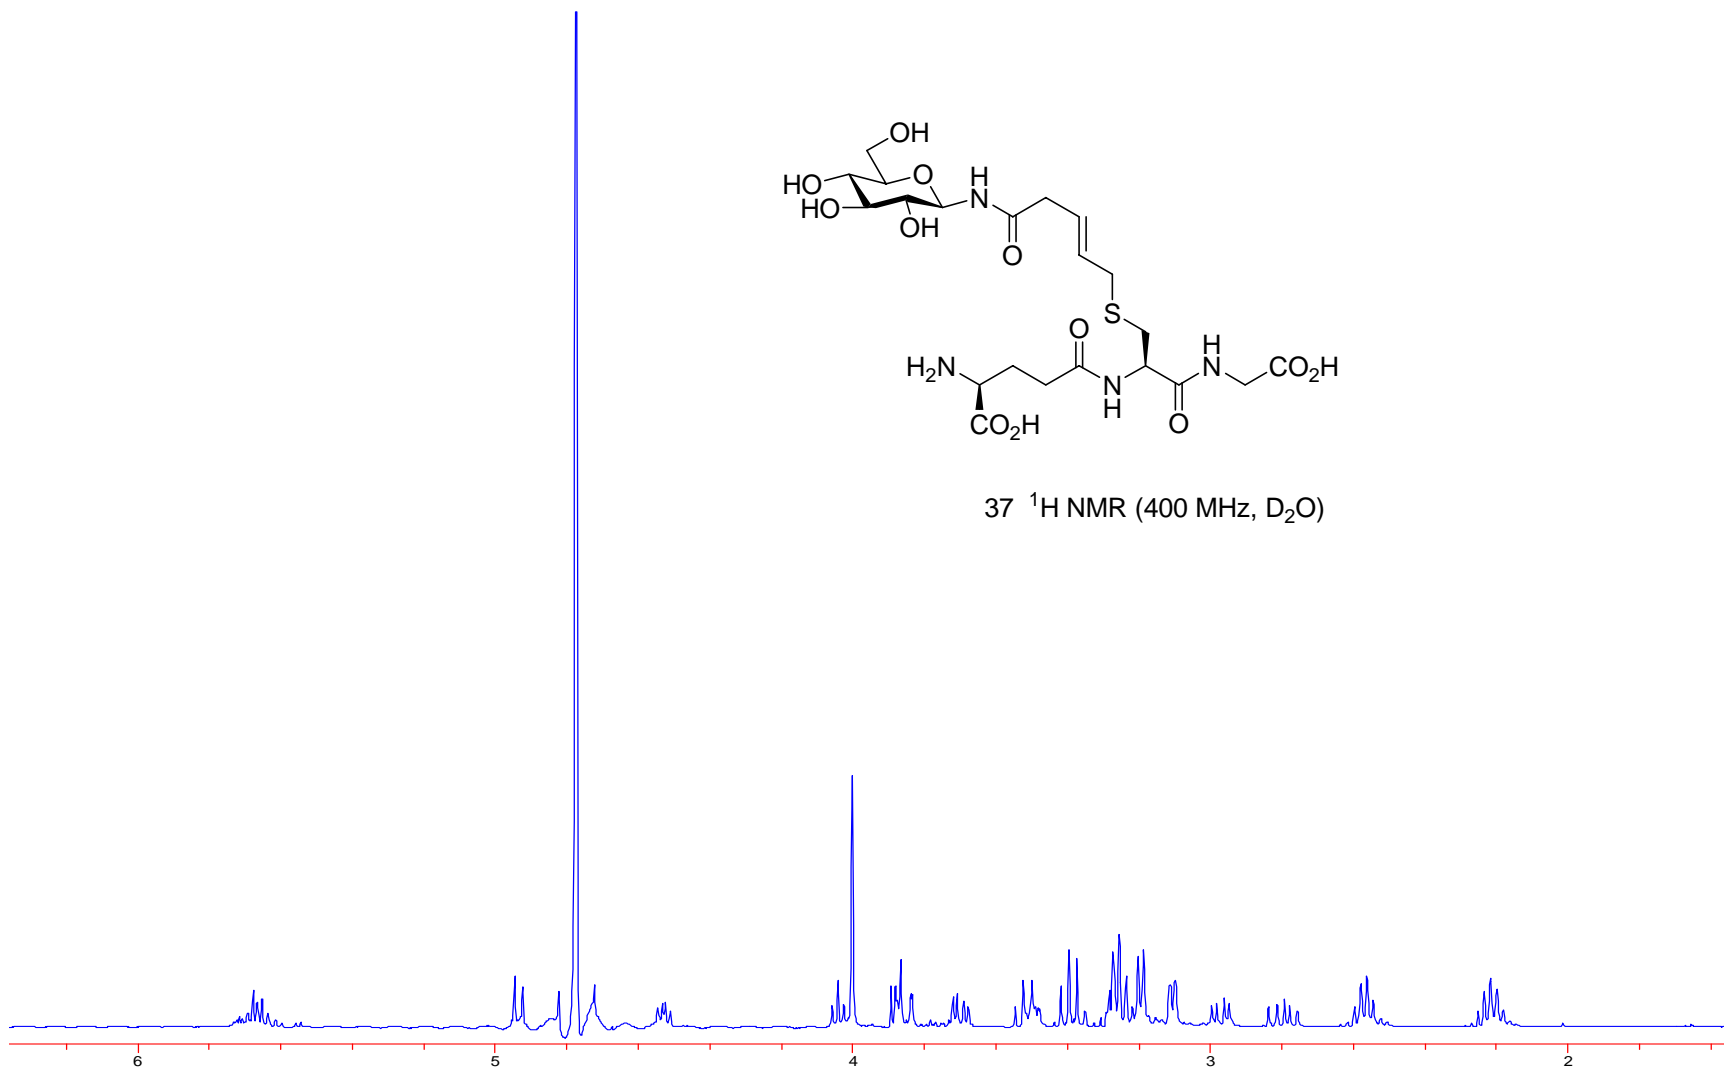

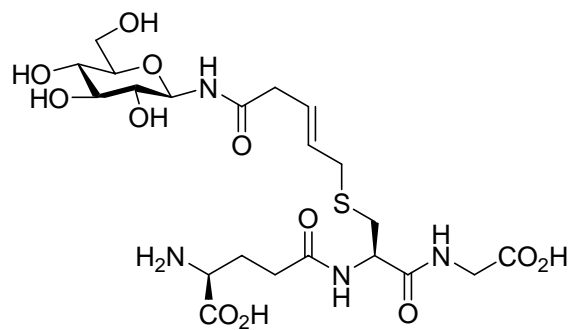

37  $^{13}\text{C}$  NMR (100 MHz,  $\text{D}_2\text{O}$ )

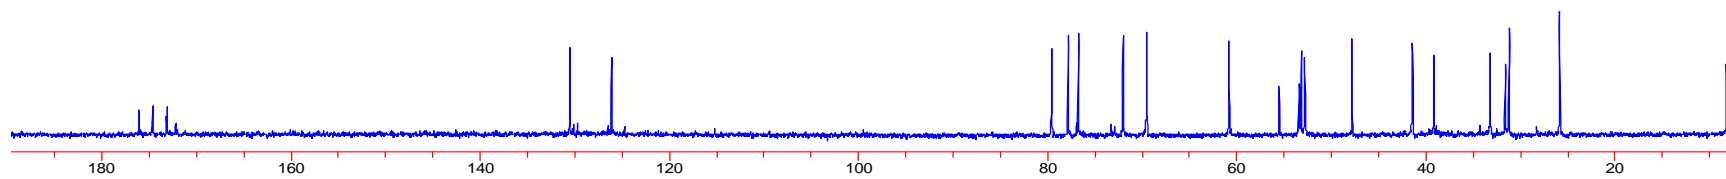

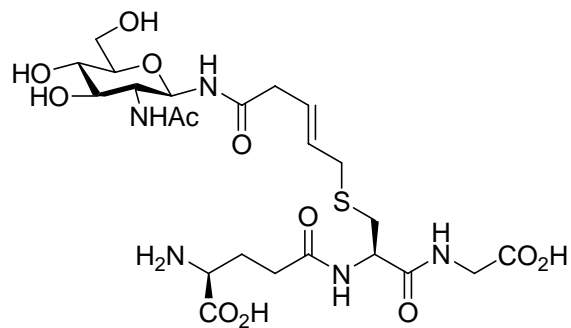

38

38 <sup>1</sup>H NMR (400 MHz, D<sub>2</sub>O)

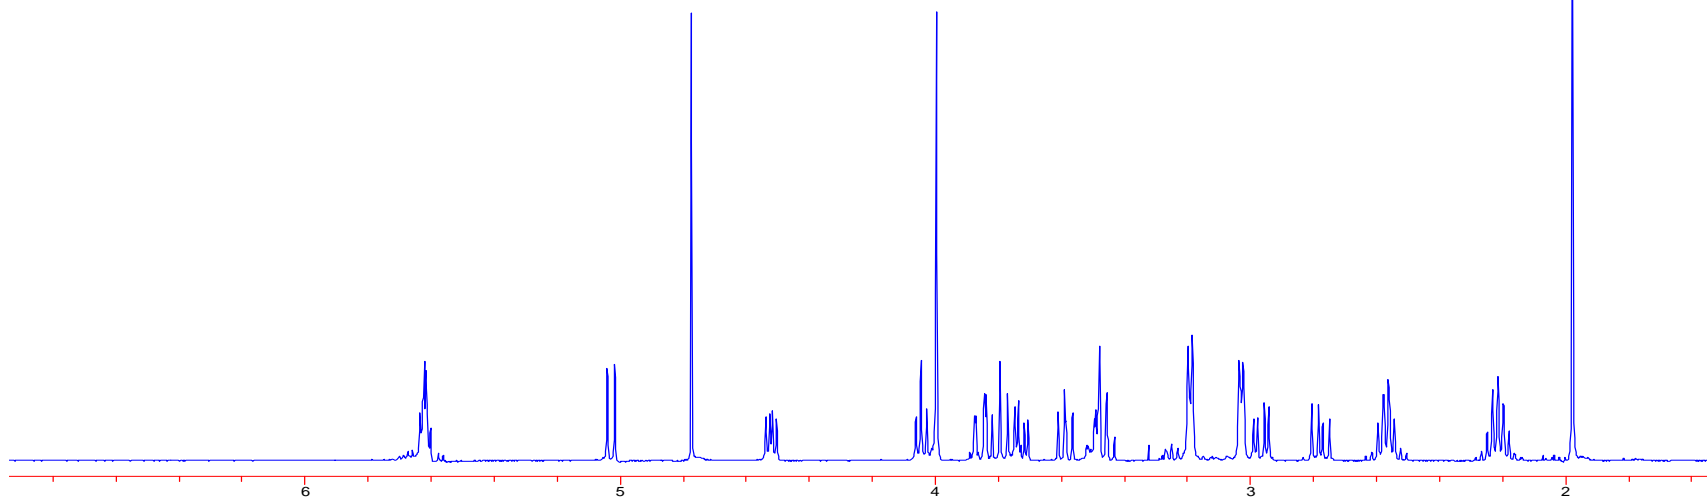

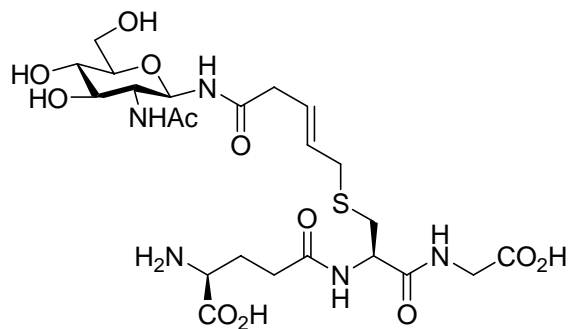

38

38  $^{13}\text{C}$  NMR (100 MHz,  $\text{D}_2\text{O}$ )

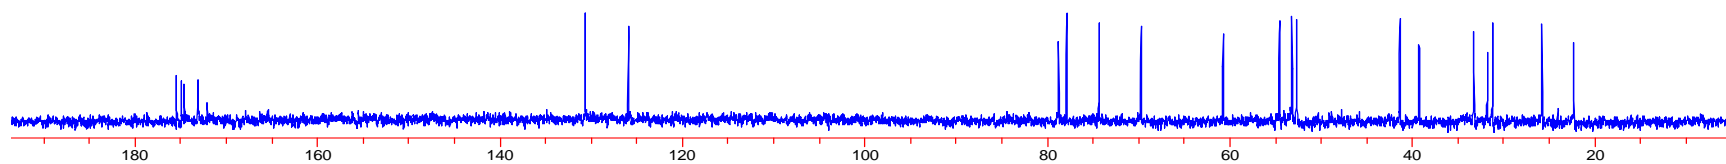

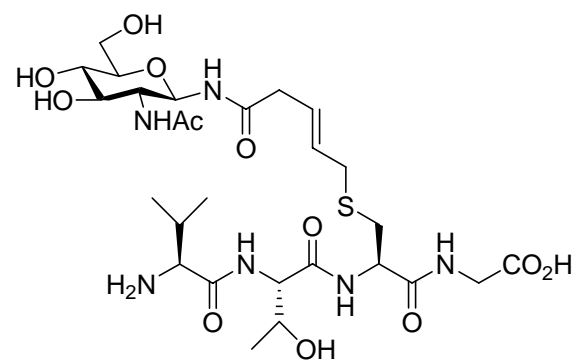

40  $^1\text{H}$  NMR (400 MHz,  $\text{D}_2\text{O}$ )

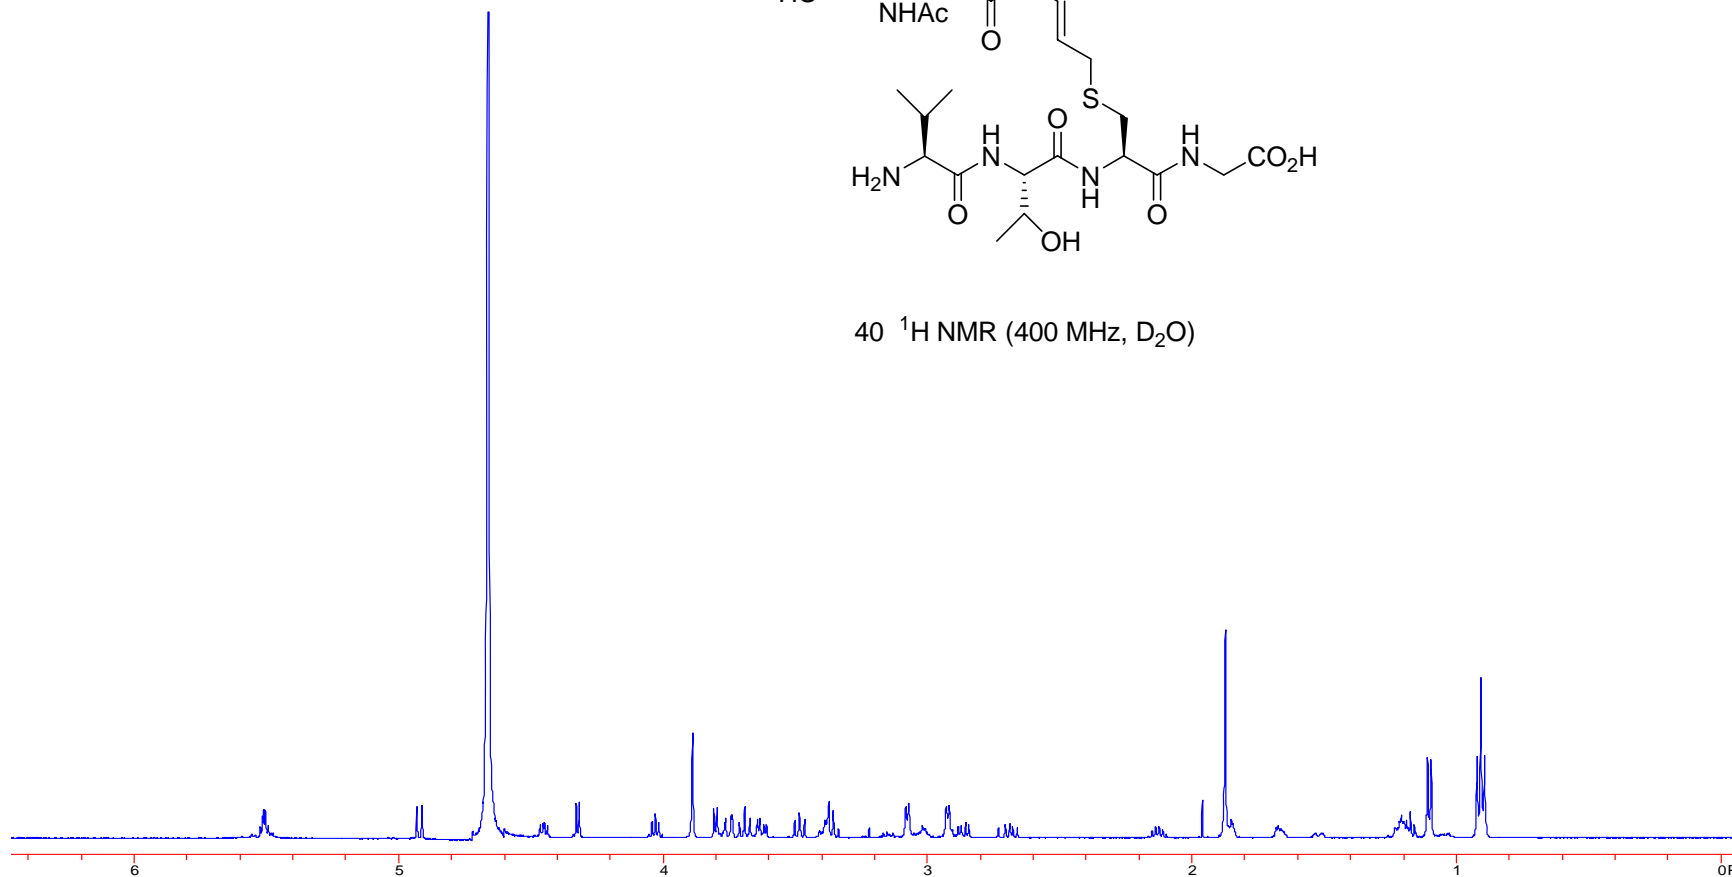

Supplement: NIHMS86296-supplement-1_si_001.pdf [file NIHMS86296-supplement-1_si_001.pdf]
